# Supplementary material
Source: PubMed Central journal article supplement (PMC4560617)

# **Spin-center shift: Alcohols as alkylating agents in heteroarene C–H functionalization**

Jian Jin, David W. C. MacMillan\*

## **Table of Contents**

**I. General Information**

**II. Mechanistic Studies**

**III. Reaction Setup**

**IV. Reaction Optimization**

**V. Experimental Procedures and Product Characterization**

**VI. NMR Spectra**

## I. General Information

Commercial reagents, photocatalysts, thiol catalysts, *p*-toluenesulfonic acid monohydrate (TsOH), and dimethyl sulfoxide (DMSO) were purchased from Sigma–Aldrich and Acros Organics, and used directly without purification. All heteroarenes and alcohols were used directly from commercial suppliers. Organic solutions were concentrated under reduced pressure on a Büchi rotary evaporator using an isopropyl alcohol-dry ice bath. Chromatographic purification of products was accomplished by flash chromatography on silica gel (Fluka, 230-400 mesh). Thin layer chromatography (TLC) was performed on Analtech Uniplate 0.25 mm silica gel plates. Visualization of the developed chromatogram was performed by fluorescence quenching, *p*-anisaldehyde, potassium permanganate, or ceric ammonium molybdate stain.  $^1\text{H}$  and  $^{13}\text{C}$  NMR spectra were recorded on a Bruker UltraShield Plus 500 MHz (125 MHz) instrument, and are internally referenced to residual protio solvent signals (note:  $\text{CDCl}_3$  referenced at 7.26 and 77.0 ppm respectively;  $\text{CD}_3\text{OD}$  referenced at 3.31 and 49.0 ppm respectively). Data for  $^1\text{H}$  NMR are reported as follows: chemical shift ( $\delta$  ppm), multiplicity (s = singlet, d = doublet, t = triplet, q = quartet, m = multiplet, dd = doublet of doublets, dt = doublet of triplets, br = broad), coupling constant (Hz) and integration. Data for  $^{13}\text{C}$  NMR are reported in terms of chemical shift and no special nomenclature is used for equivalent carbons. IR spectra were recorded on a Perkin Elmer Spectrum 100 FTIR spectrometer and are reported in wavenumbers ( $\text{cm}^{-1}$ ). High resolution mass spectra were obtained at Princeton University mass spectrometry facilities on Agilent Technologies 6220 Time-Of-Flight LC/MS with electrospray ionization method.

## II. Mechanistic Studies

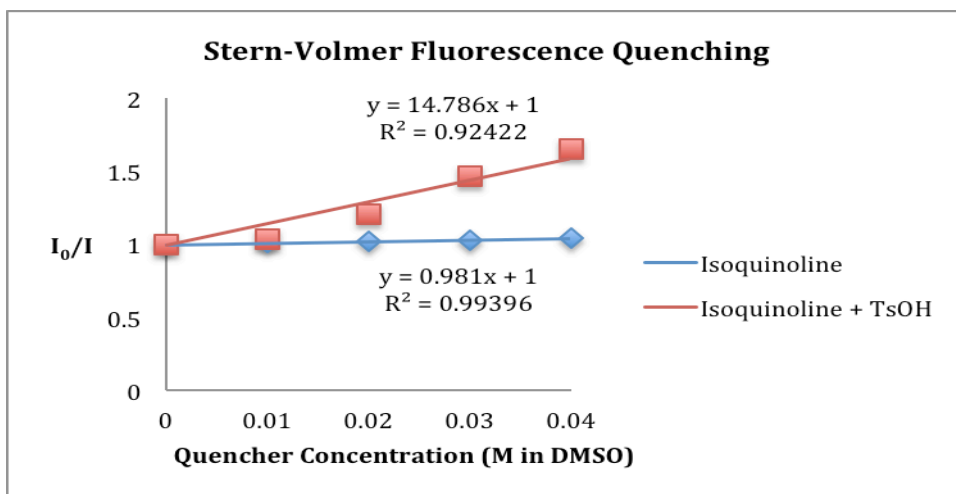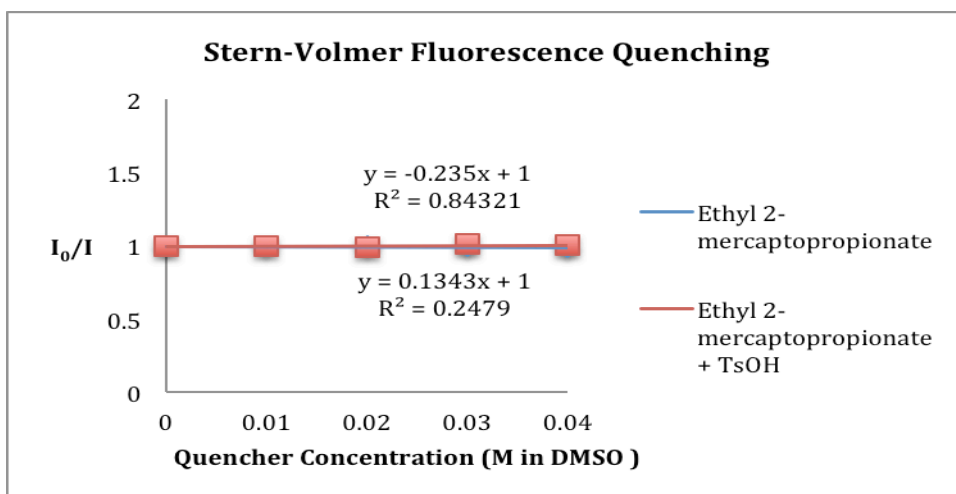

**Fig. S1.** Stern-Volmer quenching experiments of the heteroarene and thiol catalyst.

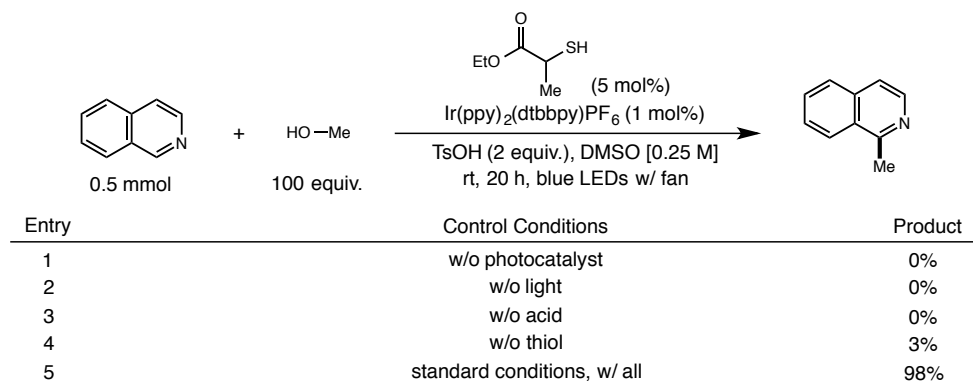

<sup>1</sup>H NMR yield using TsOH as the internal standard.

**Fig. S2.** Control experiments.

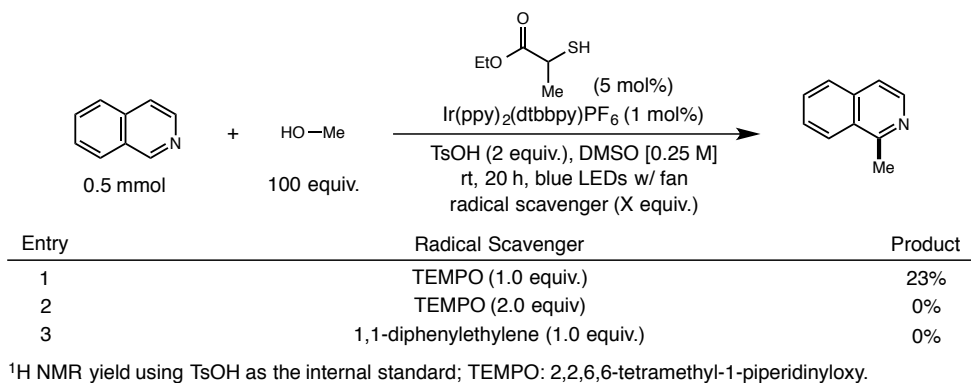

<sup>1</sup>H NMR yield using TsOH as the internal standard; TEMPO: 2,2,6,6-tetramethyl-1-piperidinyloxy.

**Fig. S3. Radical quenching experiments with TEMPO and 1,1-diphenylethylene.**

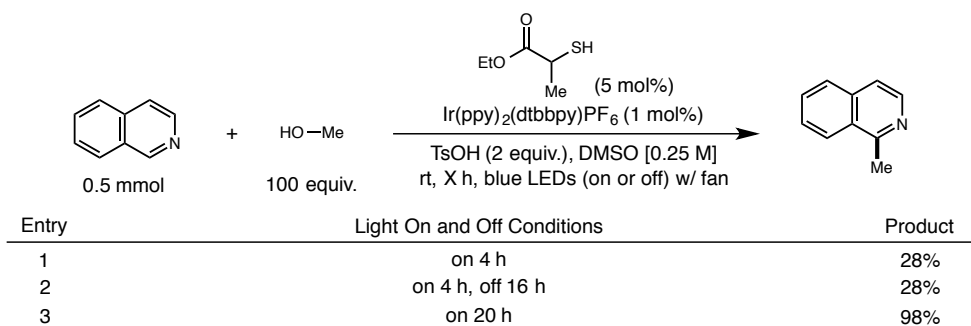

<sup>1</sup>H NMR yield using TsOH as the internal standard.

**Fig. S4. Light on and off experiments.**

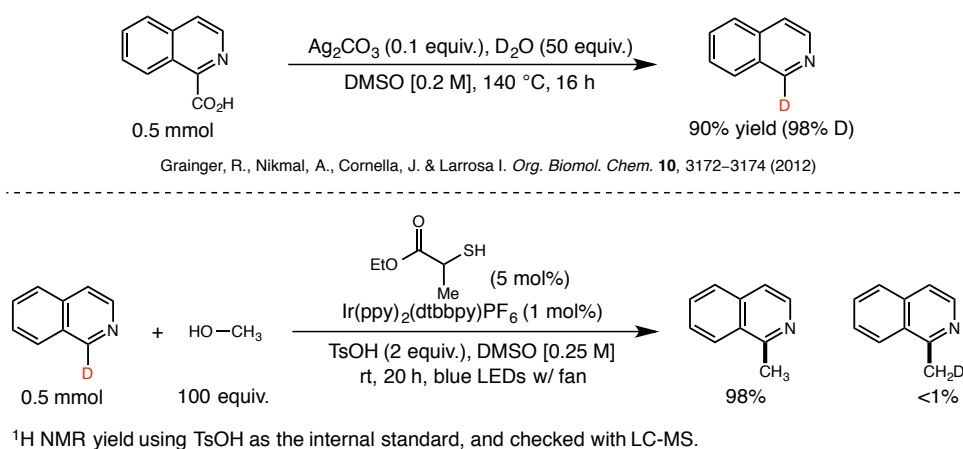

<sup>1</sup>H NMR yield using TsOH as the internal standard, and checked with LC-MS.

**Fig. S5. Deuterium-labeling experiments.**

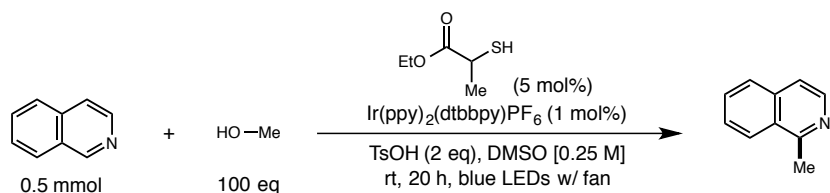

| Entry | Degas Procedures                                      | Product |
|-------|-------------------------------------------------------|---------|
| 1     | none                                                  | 56%     |
| 2     | head space purging with N <sub>2</sub> for 15 min     | 98%     |
| 3     | into solution sparging with N <sub>2</sub> for 15 min | 99%     |
| 4     | freeze-pump-thaw 3 times                              | 98%     |

<sup>1</sup>H NMR yield using TsOH as the internal standard.

**Fig. S6. Oxygen effect to the alkylation reaction.**

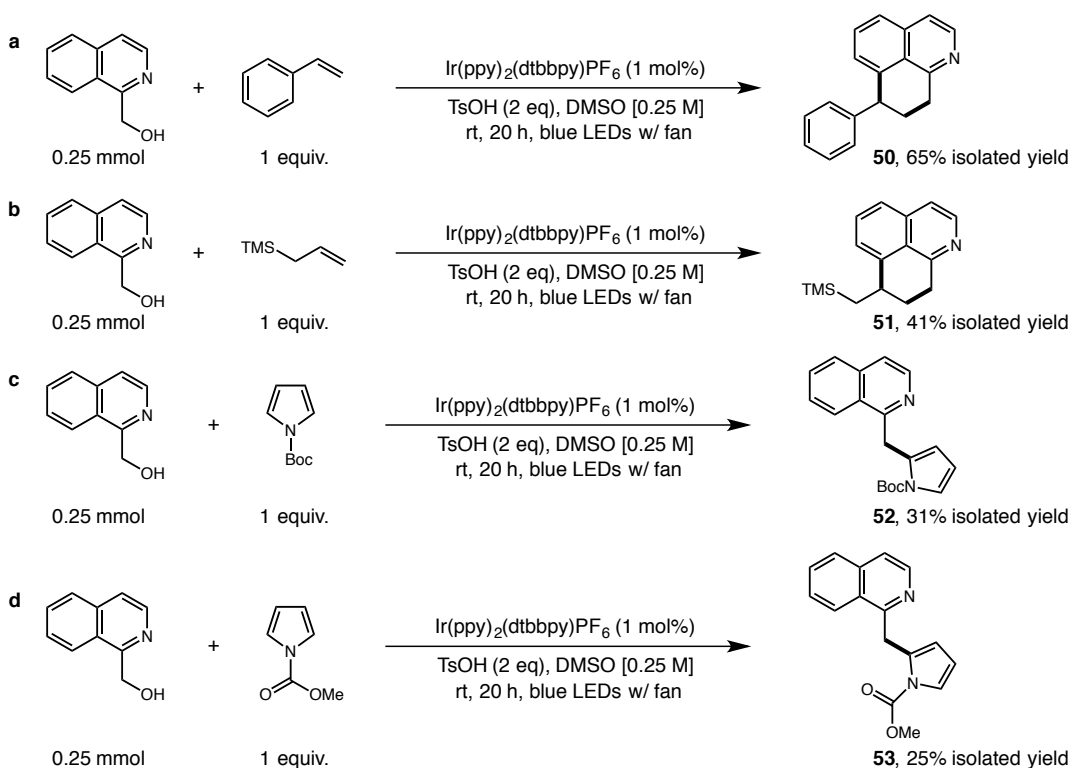

**Fig. S7. Radical trapping experiments with olefins and arenes.**

### III. Reaction Setup

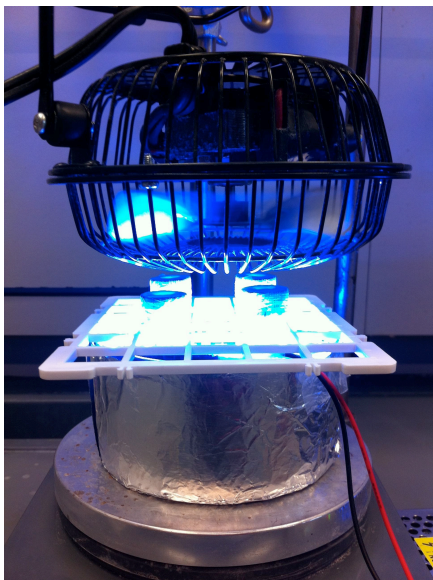

Fig. S8. Reaction setup with the magnetic stirrer, blue LED strip circled inside the glass dish (covered with aluminum foil outside), vial rack, and mini fan.

### IV. Reaction optimization

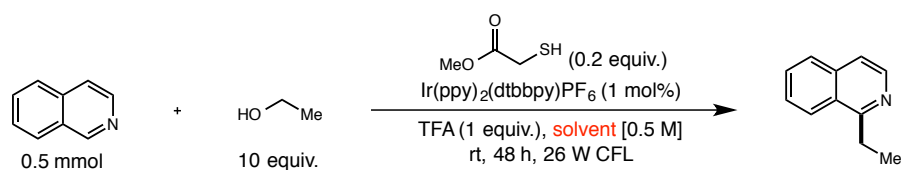

| Entry | Solvent                       | Product |
|-------|-------------------------------|---------|
| 1     | acetonitrile                  | 16%     |
| 2     | propionitrile                 | 22%     |
| 3     | <i>N,N</i> -dimethylacetamide | 31%     |
| 4     | <i>N,N</i> -dimethylformamide | 33%     |
| 5     | dimethyl sulfoxide (DMSO)     | 56%     |
| 6     | dichloromethane               | 20%     |
| 7     | 1,2-dichloroethane            | 21%     |
| 8     | chloroform                    | 29%     |
| 9     | 1,2-dimethoxyethane           | 19%     |
| 10    | ethyl acetate                 | 16%     |
| 11    | toluene                       | 10%     |
| 12    | acetone                       | 13%     |

<sup>1</sup>H NMR yield using 1,3-benzodioxole as the internal standard.

Fig. S9. Solvent evaluation.

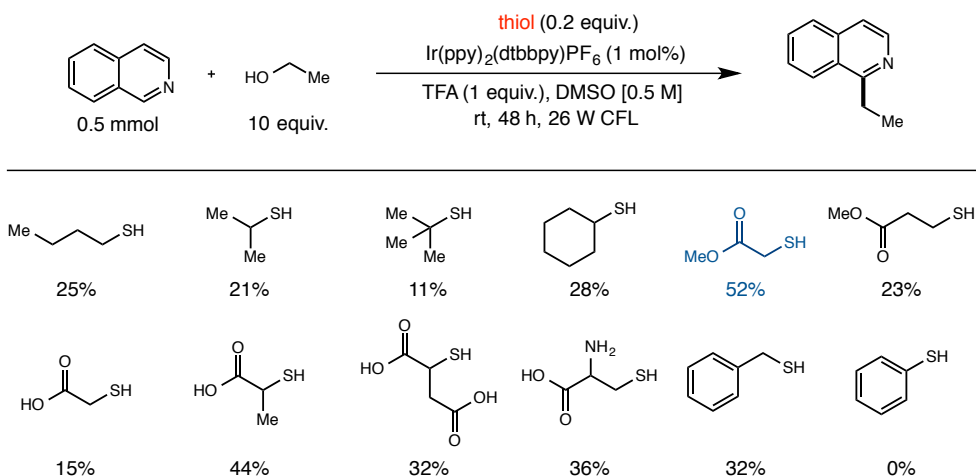

<sup>1</sup>H NMR yield using 1,3-benzodioxole as the internal standard.

**Fig. S10. Organocatalyst evaluation.**

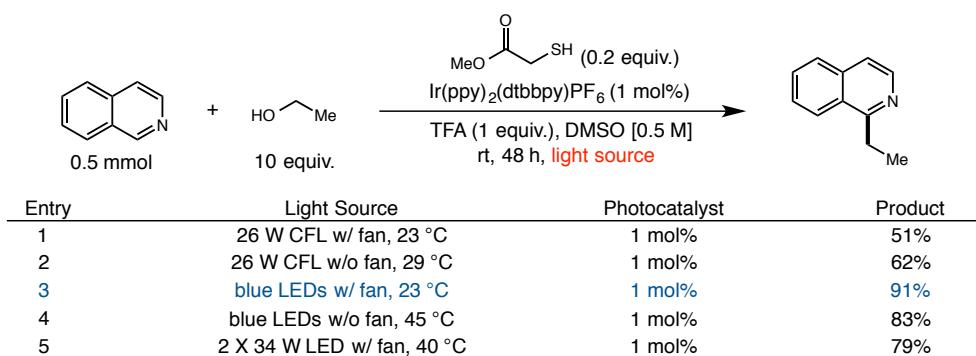

<sup>1</sup>H NMR yield using 1,3-benzodioxole as the internal standard.

**Fig. S11. Light source evaluation.**

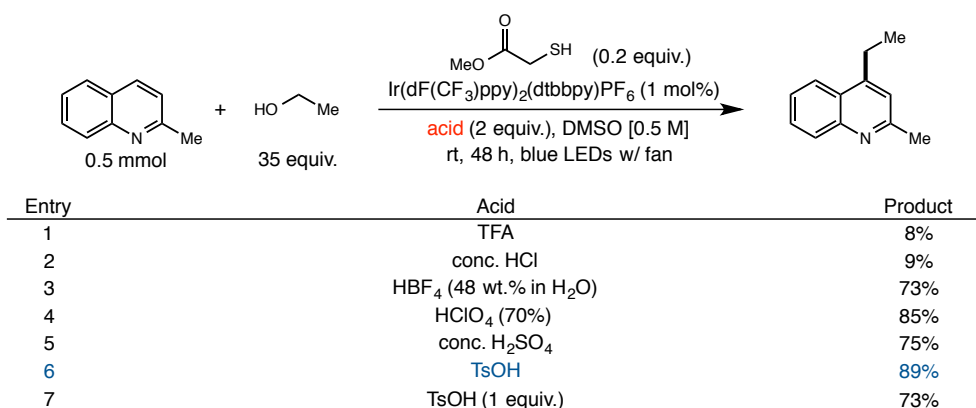

<sup>1</sup>H NMR yield using 1,3-benzodioxole as the internal standard.

**Fig. S12. Acid evaluation.**

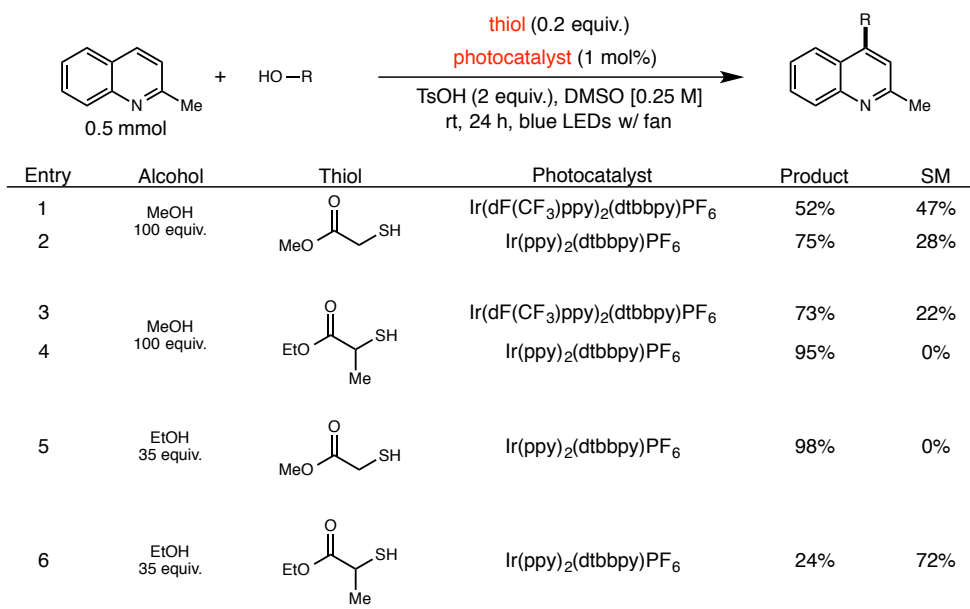

<sup>1</sup>H NMR yield using TsOH as the internal standard.

**Fig. S13. Organocatalyst comparisons.**

## V. Experimental Procedures and Product Characterization

**General Procedure A for the Alkylation (Heteroarene Scope):** To an 8 mL vial equipped with a Teflon septum and a magnetic stir bar was charged Ir(ppy)<sub>2</sub>(dtbbpy)PF<sub>6</sub> (4.6 mg, 5.0 μmol, 0.01 equiv.), TsOH (190.2 mg, 1.00 mmol, 2.0 equiv.), heteroarene (0.50 mmol, 1.0 equiv.), 2.0 mL of MeOH and 2.0 mL of DMSO. The reaction mixture was degassed by sparging with nitrogen for 10 min with an outlet needle, and added with ethyl 2-mercaptoacetate (3.5 μL, 25.0 μmol, 0.05 equiv.), then irradiated with the blue LEDs (approximately 2 cm away from the light source) at room temperature under a mini fan. Upon reaction completion as judged by TLC and LCMS (20-48 hours), the reaction mixture was diluted with 1 M NaOH aqueous solution (2 mL) and CH<sub>2</sub>Cl<sub>2</sub> (20 mL), washed with brine (3×10 mL), dried over Na<sub>2</sub>SO<sub>4</sub>, and concentrated *in vacuo*. Purification



of the crude product by flash chromatography on silica gel using the indicated solvent system afforded the desired product.

**General Procedure B for the Alkylation (Alcohol Scope):** To an 8 mL vial equipped with a Teflon septum and a magnetic stir bar was charged Ir(ppy)<sub>2</sub>(dtbbpy)PF<sub>6</sub> (4.6 mg, 5.0 μmol, 0.01 equiv.), TsOH (190.2 mg, 1.00 mmol, 2.0 equiv.), isoquinoline (61.0 μL, 0.50 mmol, 1.0 equiv.), alcohol (5.00 mmol, 10.0 equiv.) and 2.0 mL of DMSO. The reaction mixture was degassed by sparging with nitrogen for 10 min with an outlet needle, and added with methyl thioglycolate (2.5 μL, 25.0 μmol, 0.05 equiv.), then irradiated with the blue LEDs (approximately 2 cm away from the light source) at room temperature under a mini fan. Upon reaction completion as judged by TLC and LCMS (20-48 hours), the reaction mixture was diluted with 1 M NaOH aqueous solution (2 mL) and CH<sub>2</sub>Cl<sub>2</sub> (20 mL), washed with brine (3×10 mL), dried over Na<sub>2</sub>SO<sub>4</sub>, and concentrated *in vacuo*. Purification of the crude product by flash chromatography on silica gel using the indicated solvent system afforded the desired product.

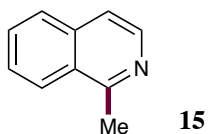

**1-Methylisoquinoline (15):** According to the general procedure A, Ir(ppy)<sub>2</sub>(dtbbpy)PF<sub>6</sub> (4.6 mg, 5.0 μmol, 0.01 equiv.), TsOH (190.2 mg, 1.00 mmol, 2.0 equiv.), isoquinoline (61.0 μL, 0.50 mmol, 1.0 equiv.), ethyl 2-mercaptopropionate (3.5 μL, 25.0 μmol, 0.05 equiv.), 2.0 mL of MeOH and 2.0 mL of DMSO were used. After 20 hours, the reaction mixture was subjected to the workup procedure outlined in the general procedure and

purified by flash chromatography (20% ethyl acetate/hexanes) to provide the title compound as a colorless oil (65.6 mg, 92% yield).  $^1\text{H}$  NMR (500 MHz,  $\text{CDCl}_3$ ):  $\delta$  8.39 (d,  $J = 5.8$  Hz, 1H), 8.10 (d,  $J = 8.4$  Hz, 1H), 7.79 (d,  $J = 8.2$  Hz, 1H), 7.66 (dd,  $J = 8.1, 6.8$  Hz, 1H), 7.58 (dd,  $J = 8.2, 6.8$  Hz, 1H), 7.49 (d,  $J = 5.8$  Hz, 1H), 2.95 (s, 3H);  $^{13}\text{C}$  NMR (125 MHz,  $\text{CDCl}_3$ ):  $\delta$  158.5, 141.8, 135.8, 129.9, 127.4, 127.1, 127.0, 125.6, 119.2, 22.4; HRMS (ESI)  $m/z$  calculated for  $\text{C}_{10}\text{H}_{10}\text{N}$   $[(\text{M}+\text{H})^+]$  144.0808, found 144.0813. IR (film) 3051, 1622, 1562, 1390, 1357, 1241, 1020, 963  $\text{cm}^{-1}$ . Spectra data are consistent with those reported in the literature: *Angew. Chem. Int. Ed.* **52**, 6983–6987 (2013).

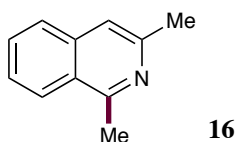

**1,3-Dimethylisoquinoline (16):** According to the general procedure A,  $\text{Ir}(\text{ppy})_2(\text{dtbbpy})\text{PF}_6$  (4.6 mg, 5.0  $\mu\text{mol}$ , 0.01 equiv.), TsOH (190.2 mg, 1.00 mmol, 2.0 equiv.), 3-methylisoquinoline (73.1 mg, 0.50 mmol, 1.0 equiv.), ethyl 2-mercaptopropionate (3.5  $\mu\text{L}$ , 25.0  $\mu\text{mol}$ , 0.05 equiv.), 2.0 mL of MeOH and 2.0 mL of DMSO were used. After 20 hours, the reaction mixture was subjected to the workup procedure outlined in the general procedure and purified by flash chromatography (20% ethyl acetate/hexanes) to provide the title compound as a colorless oil (71.5 mg, 91% yield).  $^1\text{H}$  NMR (500 MHz,  $\text{CDCl}_3$ ):  $\delta$  8.05 (d,  $J = 8.4$  Hz, 1H), 7.69 (d,  $J = 8.3$  Hz, 1H), 7.60 (dd,  $J = 8.2, 6.7$  Hz, 1H), 7.49 (dd,  $J = 8.2, 6.7$  Hz, 1H), 7.32 (s, 1H), 2.93 (s, 3H), 2.65 (s, 3H);  $^{13}\text{C}$  NMR (125 MHz,  $\text{CDCl}_3$ ):  $\delta$  158.0, 150.2, 136.6, 129.8, 126.6, 126.0, 125.6, 125.5, 117.1, 24.2, 22.3; HRMS (ESI)  $m/z$  calculated for  $\text{C}_{11}\text{H}_{12}\text{N}$   $[(\text{M}+\text{H})^+]$  158.0964, found 158.0965. IR (film) 2919, 1625, 1591, 1567, 1441, 1391, 1361, 1182,

873  $\text{cm}^{-1}$ . Spectra data are consistent with those reported in the literature: *Tetrahedron Lett.* **50**, 2305–2308 (2009).

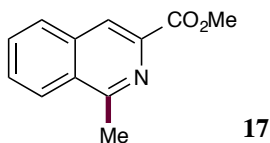

**Methyl 1-Methylisoquinoline-3-carboxylate (17):** According to the general procedure A,  $\text{Ir}(\text{ppy})_2(\text{dtbbpy})\text{PF}_6$  (4.6 mg, 5.0  $\mu\text{mol}$ , 0.01 equiv.), TsOH (190.2 mg, 1.00 mmol, 2.0 equiv.), methyl 3-isoquinolinecarboxylate (95.5 mg, 0.50 mmol, 1.0 equiv.), ethyl 2-mercaptopropionate (3.5  $\mu\text{L}$ , 25.0  $\mu\text{mol}$ , 0.05 equiv.), 4.0 mL of MeOH and 4.0 mL of DMSO were used. After 48 hours, the reaction mixture was subjected to the workup procedure outlined in the general procedure and purified by flash chromatography (10% ethyl acetate/hexanes) to provide the title compound as a white solid (98.5 mg, 98% yield).  $^1\text{H}$  NMR (500 MHz,  $\text{CDCl}_3$ ):  $\delta$  8.43 (s, 1H), 8.15 (d,  $J = 8.3$  Hz, 1H), 7.92 (d,  $J = 8.4$  Hz, 1H), 7.72 (m, 2H), 4.02 (s, 3H), 3.02 (s, 3H);  $^{13}\text{C}$  NMR (125 MHz,  $\text{CDCl}_3$ ):  $\delta$  166.4, 159.3, 140.3, 135.4, 130.6, 129.3, 128.9, 128.6, 125.7, 122.9, 52.8, 22.6; HRMS (ESI)  $m/z$  calculated for  $\text{C}_{12}\text{H}_{12}\text{NO}_2$   $[(\text{M}+\text{H})^+]$  202.0863, found 202.0866. IR (film) 2950, 1712, 1286, 1239, 1149, 1108, 1001, 902  $\text{cm}^{-1}$ . Spectra data are consistent with those reported in the literature : *J. Org. Chem.* **79**, 7041–7050 (2014).

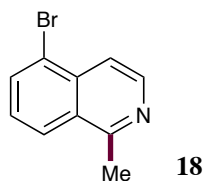

**5-Bromo-1-methylisoquinoline (18):** According to the general procedure A, Ir(ppy)<sub>2</sub>(dtbbpy)PF<sub>6</sub> (4.6 mg, 5.0 μmol, 0.01 equiv.), TsOH (190.2 mg, 1.00 mmol, 2.0 equiv.), 5-bromoisoquinoline (105.1 mg, 0.50 mmol, 1.0 equiv.), ethyl 2-mercaptopropionate (3.5 μL, 25.0 μmol, 0.05 equiv.), 4.0 mL of MeOH and 2.0 mL of DMSO were used. After 48 hours, the reaction mixture was subjected to the workup procedure outlined in the general procedure and purified by flash chromatography (20% ethyl acetate/hexanes) to provide the title compound as a colorless oil (94.3 mg, 85% yield). <sup>1</sup>H NMR (500 MHz, CDCl<sub>3</sub>): δ 8.48 (d, *J* = 6.0 Hz, 1H), 8.09 (d, *J* = 8.4 Hz, 1H), 7.94 (d, *J* = 7.5 Hz, 1H), 7.86 (d, *J* = 6.0 Hz, 1H), 7.43 (t, *J* = 7.9 Hz, 1H), 2.97 (s, 3H); <sup>13</sup>C NMR (125 MHz, CDCl<sub>3</sub>): δ 159.0, 143.2, 135.1, 133.7, 128.5, 127.3, 125.3, 122.3, 118.1, 22.6; HRMS (ESI) *m/z* calculated for C<sub>10</sub>H<sub>9</sub>BrN [(M+H)<sup>+</sup>] 221.9913, found 221.9912. IR (film) 3038, 1575, 1485, 1401, 1342, 1220, 1076, 829 cm<sup>-1</sup>.

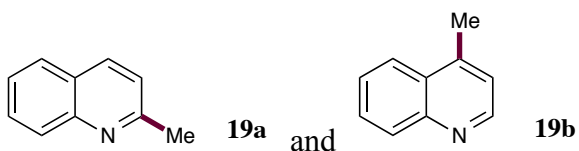

**2-Methylquinoline (19a) and 4-Methylquinoline (19b):** According to the general procedure A, Ir(ppy)<sub>2</sub>(dtbbpy)PF<sub>6</sub> (4.6 mg, 5.0 μmol, 0.01 equiv.), TsOH (190.2 mg, 1.00 mmol, 2.0 equiv.), quinoline (61.0 μL, 0.50 mmol, 1.0 equiv.), ethyl 2-mercaptopropionate (3.5 μL, 25.0 μmol, 0.05 equiv.), 4.0 mL of MeOH and 2.0 mL of DMSO were used. After 48 hours, the reaction mixture was subjected to the workup procedure outlined in the general procedure and purified by flash chromatography (5% ethyl acetate/hexanes) to provide the title compounds as colorless oils (30.8 mg, 43% yield for **19a**; 15.8 mg, 22% yield for **19b**). Compound **19a**: <sup>1</sup>H NMR (500 MHz,

CDCl<sub>3</sub>):  $\delta$  8.04 (d,  $J$  = 9.0 Hz, 1H), 8.02 (d,  $J$  = 7.9 Hz, 1H), 7.77 (d,  $J$  = 8.0 Hz, 1H), 7.68 (t,  $J$  = 7.7 Hz, 1H), 7.48 (t,  $J$  = 7.5 Hz, 1H), 7.28 (d,  $J$  = 8.5 Hz, 1H), 2.75 (s, 3H); <sup>13</sup>C NMR (125 MHz, CDCl<sub>3</sub>):  $\delta$  159.0, 147.8, 136.1, 129.4, 128.6, 127.5, 126.4, 125.6, 122.0, 25.4; HRMS (ESI)  $m/z$  calculated for C<sub>10</sub>H<sub>10</sub>N [(M+H)<sup>+</sup>] 144.0808, found 144.0813. IR (film) 3055, 1601, 1506, 1423, 1220, 1116, 1009, 819 cm<sup>-1</sup>. Compound **19b**: <sup>1</sup>H NMR (500 MHz, CDCl<sub>3</sub>):  $\delta$  8.78 (d,  $J$  = 4.4 Hz, 1H), 8.11 (d,  $J$  = 8.4 Hz, 1H), 8.00 (d,  $J$  = 8.1 Hz, 1H), 7.71 (dd,  $J$  = 8.4, 6.6 Hz, 1H), 7.57 (dd,  $J$  = 8.2, 6.8 Hz, 1H), 7.24 (d,  $J$  = 4.3 Hz, 1H), 2.72 (s, 3H); <sup>13</sup>C NMR (125 MHz, CDCl<sub>3</sub>):  $\delta$  150.2, 148.0, 144.3, 130.0, 129.1, 128.3, 126.3, 123.8, 121.9, 18.7; HRMS (ESI)  $m/z$  calculated for C<sub>10</sub>H<sub>10</sub>N [(M+H)<sup>+</sup>] 144.0808, found 144.0812. IR (film) 2925, 1595, 1508, 1454, 1391, 1305, 1138, 838 cm<sup>-1</sup>. Spectra data are consistent with those reported in the literature: *J. Am. Chem. Soc.* **136**, 11910–11913 (2014).

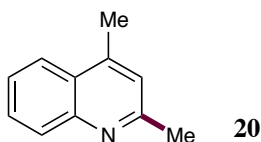

**2,4-Dimethylquinoline (20):** According to the general procedure A, Ir(ppy)<sub>2</sub>(dtbbpy)PF<sub>6</sub> (4.6 mg, 5.0  $\mu$ mol, 0.01 equiv.), TsOH (190.2 mg, 1.00 mmol, 2.0 equiv.), 4-methylquinoline (67.0  $\mu$ L, 0.50 mmol, 1.0 equiv.), ethyl 2-mercaptopropionate (3.5  $\mu$ L, 25.0  $\mu$ mol, 0.05 equiv.), 2.0 mL of MeOH and 2.0 mL of DMSO were used. After 20 hours, the reaction mixture was subjected to the workup procedure outlined in the general procedure and purified by flash chromatography (20% ethyl acetate/hexanes) to provide the title compound as a colorless oil (74.6 mg, 95% yield). <sup>1</sup>H NMR (500 MHz, CDCl<sub>3</sub>):  $\delta$  8.01 (d,  $J$  = 8.4 Hz, 1H), 7.94 (d,  $J$  = 8.3 Hz, 1H), 7.66 (dd,  $J$  = 8.4, 6.8 Hz, 1H), 7.49

(dd,  $J = 8.3, 6.8$  Hz, 1H), 7.13 (s, 1H), 2.69 (s, 3H), 2.65 (s, 3H);  $^{13}\text{C}$  NMR (125 MHz,  $\text{CDCl}_3$ ):  $\delta$  158.6, 147.6, 144.1, 129.1, 129.0, 126.5, 125.3, 123.5, 122.6, 25.2, 18.5; HRMS (ESI)  $m/z$  calculated for  $\text{C}_{11}\text{H}_{12}\text{N}$   $[(\text{M}+\text{H})^+]$  158.0964, found 158.0967. IR (film) 2920, 1602, 1562, 1446, 1372, 1192, 1025, 858  $\text{cm}^{-1}$ . Spectra data are consistent with those reported in the literature: *Org. Lett.* **10**, 173–175 (2008).

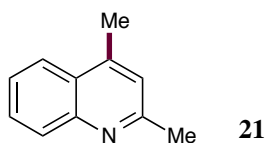

**2,4-Dimethylquinoline (21):** According to the general procedure A,  $\text{Ir}(\text{ppy})_2(\text{dtbbpy})\text{PF}_6$  (4.6 mg, 5.0  $\mu\text{mol}$ , 0.01 equiv.), TsOH (190.2 mg, 1.00 mmol, 2.0 equiv.), 2-methylquinoline (66.0  $\mu\text{L}$ , 0.50 mmol, 1.0 equiv.), ethyl 2-mercaptopropionate (3.5  $\mu\text{L}$ , 25.0  $\mu\text{mol}$ , 0.05 equiv.), 2.0 mL of MeOH and 2.0 mL of DMSO were used. After 20 hours, the reaction mixture was subjected to the workup procedure outlined in the general procedure and purified by flash chromatography (20% ethyl acetate/hexanes) to provide the title compound as a colorless oil (73.1 mg, 93% yield).  $^1\text{H}$  NMR (500 MHz,  $\text{CDCl}_3$ ):  $\delta$  8.01 (d,  $J = 8.4$  Hz, 1H), 7.93 (d,  $J = 8.3$  Hz, 1H), 7.66 (dd,  $J = 8.5, 6.8$  Hz, 1H), 7.48 (dd,  $J = 8.3, 6.8$  Hz, 1H), 7.11 (s, 1H), 2.68 (s, 3H), 2.64 (s, 3H);  $^{13}\text{C}$  NMR (125 MHz,  $\text{CDCl}_3$ ):  $\delta$  158.6, 147.7, 144.1, 129.1, 129.0, 126.5, 125.3, 123.5, 122.7, 25.2, 18.5; HRMS (ESI)  $m/z$  calculated for  $\text{C}_{11}\text{H}_{12}\text{N}$   $[(\text{M}+\text{H})^+]$  158.0964, found 158.0964. IR (film) 2919, 1602, 1562, 1445, 1372, 1192, 1035, 858  $\text{cm}^{-1}$ . Spectra data are consistent with those reported in the literature: *Org. Lett.* **10**, 173–175 (2008).

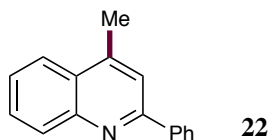

**4-Methyl-2-phenylquinoline (22):** According to the general procedure A, Ir(ppy)<sub>2</sub>(dtbbpy)PF<sub>6</sub> (4.6 mg, 5.0 μmol, 0.01 equiv.), TsOH (190.2 mg, 1.00 mmol, 2.0 equiv.), 2-phenylquinoline (103.7 mg, 0.50 mmol, 1.0 equiv.), ethyl 2-mercaptopropionate (3.5 μL, 25.0 μmol, 0.05 equiv.), 4.0 mL of MeOH and 2.0 mL of DMSO were used. After 48 hours, the reaction mixture was subjected to the workup procedure outlined in the general procedure and purified by flash chromatography (5% ethyl acetate/hexanes) to provide the title compound as a white solid (99.9 mg, 91% yield). <sup>1</sup>H NMR (500 MHz, CDCl<sub>3</sub>): δ 8.20 (d, *J* = 8.3 Hz, 1H), 8.17 (m, 2H), 7.99 (d, *J* = 8.3 Hz, 1H), 7.73 (t, *J* = 7.0 Hz, 1H), 7.71 (s, 1H), 7.55 (t, *J* = 7.0 Hz, 1H), 7.53 (m, 2H), 7.47 (m, 1H), 2.76 (s, 3H); <sup>13</sup>C NMR (125 MHz, CDCl<sub>3</sub>): δ 157.0, 148.1, 144.7, 139.8, 130.2, 129.3, 129.1, 128.7 (2C), 127.5 (2C), 127.2, 126.0, 123.6, 119.7, 19.0; HRMS (ESI) *m/z* calculated for C<sub>16</sub>H<sub>14</sub>N [(M+H)<sup>+</sup>] 220.1121, found 220.1121. IR (film) 3059, 1596, 1550, 1495, 1450, 1347, 1028, 861 cm<sup>-1</sup>. Spectra data are consistent with those reported in the literature: *J. Am. Chem. Soc.* **136**, 11910–11913 (2014).

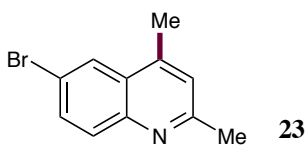

**6-Bromo-2,4-dimethylquinoline (23):** According to the general procedure A, Ir(ppy)<sub>2</sub>(dtbbpy)PF<sub>6</sub> (4.6 mg, 5.0 μmol, 0.01 equiv.), TsOH (190.2 mg, 1.00 mmol, 2.0 equiv.), 6-bromo-2-methylquinoline (115.0 mg, 0.50 mmol, 1.0 equiv.), ethyl 2-mercaptopropionate (3.5 μL, 25.0 μmol, 0.05 equiv.), 4.0 mL of MeOH and 2.0 mL of

DMSO were used. After 48 hours, the reaction mixture was subjected to the workup procedure outlined in the general procedure and purified by flash chromatography (20% ethyl acetate/hexanes) to provide the title compound as a white solid (105.0 mg, 89% yield).  $^1\text{H}$  NMR (500 MHz,  $\text{CDCl}_3$ ):  $\delta$  8.05 (s, 1H), 7.85 (d,  $J = 8.9$  Hz, 1H), 7.71 (dd,  $J = 8.9, 2.2$  Hz, 1H), 7.12 (s, 1H), 2.66 (s, 3H), 2.59 (s, 3H);  $^{13}\text{C}$  NMR (125 MHz,  $\text{CDCl}_3$ ):  $\delta$  159.2, 146.3, 143.2, 132.4, 130.9, 127.8, 126.0, 123.4, 119.3, 25.2, 18.5; HRMS (ESI)  $m/z$  calculated for  $\text{C}_{11}\text{H}_{11}\text{BrN}$   $[(\text{M}+\text{H})^+]$  236.0069, found 236.0070. IR (film) 2915, 1600, 1496, 1370, 1337, 1216, 1071, 867  $\text{cm}^{-1}$ .

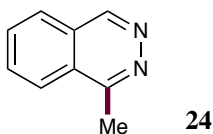

**1-Methylphthalazine (24):** According to the general procedure A,  $\text{Ir}(\text{ppy})_2(\text{dtbbpy})\text{PF}_6$  (4.6 mg, 5.0  $\mu\text{mol}$ , 0.01 equiv.), TsOH (190.2 mg, 1.00 mmol, 2.0 equiv.), phthalazine (66.5 mg, 0.50 mmol, 1.0 equiv.), ethyl 2-mercaptopropionate (3.5  $\mu\text{L}$ , 25.0  $\mu\text{mol}$ , 0.05 equiv.), 4.0 mL of MeOH and 4.0 mL of DMSO were used. After 48 hours, the reaction mixture was subjected to the workup procedure outlined in the general procedure and purified by flash chromatography (50% ethyl acetate/hexanes) to provide the title compound as a white solid (50.5 mg, 70% yield).  $^1\text{H}$  NMR (500 MHz,  $\text{CDCl}_3$ ):  $\delta$  9.39 (s, 1H), 8.07 (d,  $J = 7.7$  Hz, 1H), 7.87-7.93 (m, 3H), 3.00 (s, 3H);  $^{13}\text{C}$  NMR (125 MHz,  $\text{CDCl}_3$ ):  $\delta$  157.3, 150.5, 132.4, 132.1, 126.7, 126.2, 126.1, 124.2, 19.8; HRMS (ESI)  $m/z$  calculated for  $\text{C}_9\text{H}_9\text{N}_2$   $[(\text{M}+\text{H})^+]$  145.0760, found 145.0765. IR (film) 3386, 1556, 1495, 1397, 1376, 1235, 952, 895  $\text{cm}^{-1}$ .



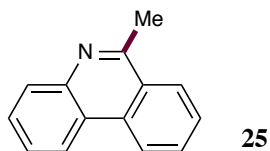

**6-Methylphenanthridine (25):** According to the general procedure A, Ir(ppy)<sub>2</sub>(dtbbpy)PF<sub>6</sub> (4.6 mg, 5.0 μmol, 0.01 equiv.), TsOH (190.2 mg, 1.00 mmol, 2.0 equiv.), phenanthridine (91.5 mg, 0.50 mmol, 1.0 equiv.), ethyl 2-mercaptopropionate (3.5 μL, 25.0 μmol, 0.05 equiv.), 2.0 mL of MeOH and 4.0 mL of DMSO were used. After 48 hours, the reaction mixture was subjected to the workup procedure outlined in the general procedure and purified by flash chromatography (10% ethyl acetate/hexanes) to provide the title compound as a white solid (90.0 mg, 93% yield). <sup>1</sup>H NMR (500 MHz, CDCl<sub>3</sub>): δ 8.57 (d, *J* = 8.1 Hz, 1H), 8.50 (d, *J* = 8.1 Hz, 1H), 8.17 (d, *J* = 8.2 Hz, 1H), 8.10 (d, *J* = 8.1 Hz, 1H), 7.79 (t, *J* = 7.1 Hz, 1H), 7.70 (t, *J* = 7.1 Hz, 1H), 7.65 (t, *J* = 7.6 Hz, 1H), 7.60 (t, *J* = 7.5 Hz, 1H), 3.02 (s, 3H); <sup>13</sup>C NMR (125 MHz, CDCl<sub>3</sub>): δ 158.8, 143.6, 132.4, 130.4, 129.3, 128.5, 127.2, 126.4, 126.2, 125.8, 123.7, 122.2, 121.9, 23.4; HRMS (ESI) *m/z* calculated for C<sub>14</sub>H<sub>12</sub>N [(M+H)<sup>+</sup>] 194.0964, found 194.0964. IR (film) 3066, 1611, 1585, 1485, 1373, 1138, 1035, 860 cm<sup>-1</sup>. Spectra data are consistent with those reported in the literature: *Org. Lett.* **16**, 4642–4645 (2014).

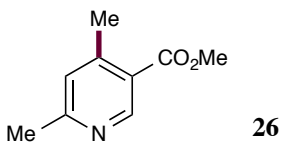

**Methyl 4,6-dimethylnicotinate (26):** According to the general procedure A, Ir(ppy)<sub>2</sub>(dtbbpy)PF<sub>6</sub> (4.6 mg, 5.0 μmol, 0.01 equiv.), TsOH (190.2 mg, 1.00 mmol, 2.0 equiv.), methyl 6-methylnicotinate (78.0 mg, 0.50 mmol, 1.0 equiv.), ethyl 2-

mercaptopropionate (3.5  $\mu\text{L}$ , 25.0  $\mu\text{mol}$ , 0.05 equiv.), 2.0 mL of MeOH and 2.0 mL of DMSO were used. After 20 hours, the reaction mixture was subjected to the workup procedure outlined in the general procedure and purified by flash chromatography (20% ethyl acetate/hexanes) to provide the title compound as a white solid (67.7 mg, 82% yield).  $^1\text{H}$  NMR (500 MHz,  $\text{CDCl}_3$ ):  $\delta$  8.96 (s, 1H), 7.03 (s, 1H), 3.90 (s, 3H), 2.57 (s, 3H), 2.54 (s, 3H);  $^{13}\text{C}$  NMR (125 MHz,  $\text{CDCl}_3$ ):  $\delta$  166.7, 161.8, 151.4, 149.6, 125.9, 122.9, 51.9, 24.4, 21.2; HRMS (ESI)  $m/z$  calculated for  $\text{C}_9\text{H}_{12}\text{NO}_2$   $[(\text{M}+\text{H})^+]$  166.0863, found 166.0868. IR (film) 2953, 1720, 1600, 1439, 1281, 1169, 1089, 780  $\text{cm}^{-1}$ . Spectra data are consistent with those reported in the literature: *J. Org. Chem.* **46**, 3040–3048 (1981).

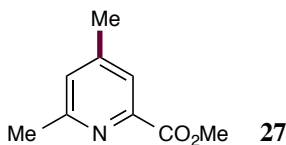

**Methyl 4,6-dimethylpicolinate (27):** According to the general procedure A,  $\text{Ir}(\text{ppy})_2(\text{dtbbpy})\text{PF}_6$  (4.6 mg, 5.0  $\mu\text{mol}$ , 0.01 equiv.), TsOH (190.2 mg, 1.00 mmol, 2.0 equiv.), methyl 6-methylpicolinate (78.0 mg, 0.50 mmol, 1.0 equiv.), ethyl 2-mercaptopropionate (3.5  $\mu\text{L}$ , 25.0  $\mu\text{mol}$ , 0.05 equiv.), 2.0 mL of MeOH and 2.0 mL of DMSO were used. After 48 hours, the reaction mixture was subjected to the workup procedure outlined in the general procedure and purified by flash chromatography (10% ethyl acetate/hexanes) to provide the title compound as a colorless oil (66.5 mg, 81% yield).  $^1\text{H}$  NMR (500 MHz,  $\text{CDCl}_3$ ):  $\delta$  7.78 (s, 1H), 7.15 (s, 1H), 3.97 (s, 3H), 2.59 (s, 3H), 2.37 (s, 3H);  $^{13}\text{C}$  NMR (125 MHz,  $\text{CDCl}_3$ ):  $\delta$  166.2, 158.7, 148.4, 147.3, 127.6,

123.5, 52.9, 24.4, 20.8; HRMS (ESI)  $m/z$  calculated for  $C_9H_{12}NO_2$   $[(M+H)^+]$  166.0863, found 166.0864. IR (film) 2953, 1718, 1607, 1438, 1332, 1237, 1196, 1017  $cm^{-1}$ .

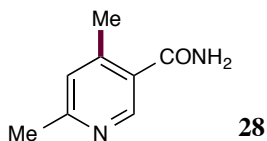

**4,6-Dimethylnicotinamide (28):** According to the general procedure A,  $Ir(ppy)_2(dtbbpy)PF_6$  (4.6 mg, 5.0  $\mu mol$ , 0.01 equiv.), TsOH (190.2 mg, 1.00 mmol, 2.0 equiv.), 6-methylnicotinamide (69.5 mg, 0.50 mmol, 1.0 equiv.), ethyl 2-mercaptopropionate (3.5  $\mu L$ , 25.0  $\mu mol$ , 0.05 equiv.), 4.0 mL of MeOH and 4.0 mL of DMSO were used. After 48 hours, the reaction mixture was subjected to the workup procedure outlined in the general procedure and purified by flash chromatography (5% methanol/ethyl acetate, containing 0.1% triethylamine) to provide the title compound as a white solid (62.3 mg, 83% yield).  $^1H$  NMR (500 MHz,  $CD_3OD$ ):  $\delta$  8.43 (s, 1H), 7.22 (s, 1H), 4.88 (br s, 2H), 2.51 (s, 3H), 2.46 (s, 3H);  $^{13}C$  NMR (125 MHz,  $CD_3OD$ ):  $\delta$  172.4, 160.7, 148.6, 147.7, 131.3, 126.9, 23.6, 19.6; HRMS (ESI)  $m/z$  calculated for  $C_8H_{11}N_2O$   $[(M+H)^+]$  151.0866, found 151.0867. IR (film) 3290, 3153, 1700, 1638, 1603, 1379, 1125, 860  $cm^{-1}$ .

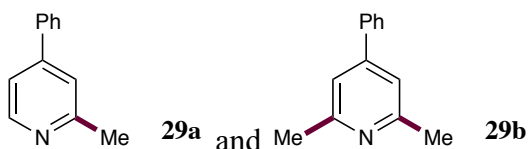

**2-Methyl-4-phenylpyridine (29a) and 2,6-Dimethyl-4-phenylpyridine (29b):** According to the general procedure A,  $Ir(ppy)_2(dtbbpy)PF_6$  (4.6 mg, 5.0  $\mu mol$ , 0.01

equiv.), TsOH (190.2 mg, 1.00 mmol, 2.0 equiv.), (80.0 mg, 0.50 mmol, 1.0 equiv.), ethyl 2-mercaptopropionate (3.5  $\mu$ L, 25.0  $\mu$ mol, 0.05 equiv.), 2.0 mL of MeOH and 2.0 mL of DMSO were used. After 48 hours, the reaction mixture was subjected to the workup procedure outlined in the general procedure and purified by flash chromatography (5% ethyl acetate/hexanes) to provide the title compounds as colorless oils (55.0 mg, 65% yield for **29a**; 10.8 mg, 12% yield for **29b**). Compound **29a**:  $^1\text{H}$  NMR (500 MHz,  $\text{CDCl}_3$ ):  $\delta$  8.54 (d,  $J = 5.1$  Hz, 1H), 7.61 (m, 2H), 7.45 (m, 2H), 7.42 (m, 1H), 7.36 (s, 1H), 7.30 (d,  $J = 4.9$  Hz, 1H), 2.62 (s, 3H);  $^{13}\text{C}$  NMR (125 MHz,  $\text{CDCl}_3$ ):  $\delta$  158.8, 149.5, 148.6, 138.4, 129.0 (2C), 128.8, 126.9 (2C), 121.2, 118.8, 24.5; HRMS (ESI)  $m/z$  calculated for  $\text{C}_{12}\text{H}_{12}\text{N}$  [(M+H) $^+$ ] 170.0964, found 170.0967. IR (film) 3027, 1595, 1545, 1473, 1390, 1291, 1002, 838  $\text{cm}^{-1}$ . Spectra data are consistent with those reported in the literature: *J. Am. Chem. Soc.* **135**, 3756–3759 (2013).

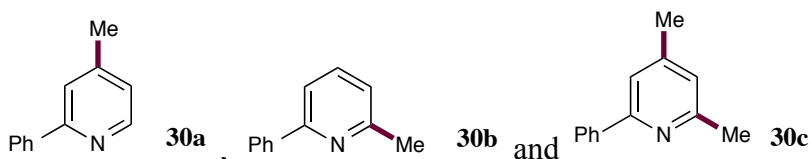

**4-Methyl-6-phenylpyridine (30a), 2-Methyl-6-phenylpyridine (30b) and 2,4-Dimethyl-6-phenylpyridine:** According to the general procedure A,  $\text{Ir}(\text{ppy})_2(\text{dtbbpy})\text{PF}_6$  (4.6 mg, 5.0  $\mu$ mol, 0.01 equiv.), TsOH (190.2 mg, 1.00 mmol, 2.0 equiv.), 2-phenylpyridine (73.0  $\mu$ L, 0.50 mmol, 1.0 equiv.), ethyl 2-mercaptopropionate (3.5  $\mu$ L, 25.0  $\mu$ mol, 0.05 equiv.), 2.0 mL of MeOH and 2.0 mL of DMSO were used. After 20 hours, the reaction mixture was subjected to the workup procedure outlined in the general procedure and purified by flash chromatography (5% ethyl acetate/hexanes) to provide the title compounds as colorless oils (51.6 mg, 61% yield for **30a**; 12.7 mg, 15% yield for

**30b**, 6.3 mg, 7% yield for **30c**). Compound **30a**:  $^1\text{H}$  NMR (500 MHz,  $\text{CDCl}_3$ ):  $\delta$  8.55 (d,  $J = 5.0$  Hz, 1H), 7.98 (d,  $J = 7.0$  Hz, 2H), 7.55 (s, 1H), 7.47 (t,  $J = 7.5$  Hz, 2H), 7.40 (t,  $J = 7.2$  Hz, 1H), 7.05 (d,  $J = 4.6$  Hz, 1H), 2.41 (s, 3H);  $^{13}\text{C}$  NMR (125 MHz,  $\text{CDCl}_3$ ):  $\delta$  157.3, 149.4, 147.7, 139.5, 128.8, 128.6 (2C), 126.9 (2C), 123.1, 121.5, 21.2; HRMS (ESI)  $m/z$  calculated for  $\text{C}_{12}\text{H}_{12}\text{N}$   $[(\text{M}+\text{H})^+]$  170.0964, found 170.0962. IR (film) 3053, 1601, 1557, 1445, 1273, 1073, 1030, 866  $\text{cm}^{-1}$ . Compound **30b**:  $^1\text{H}$  NMR (500 MHz,  $\text{CDCl}_3$ ):  $\delta$  7.98 (d,  $J = 7.5$  Hz, 2H), 7.63 (t,  $J = 7.7$  Hz, 1H), 7.52 (d,  $J = 7.8$  Hz, 1H), 7.47 (t,  $J = 7.5$  Hz, 2H), 7.40 (t,  $J = 7.3$  Hz, 1H), 7.10 (d,  $J = 7.6$  Hz, 1H), 2.63 (s, 3H);  $^{13}\text{C}$  NMR (125 MHz,  $\text{CDCl}_3$ ):  $\delta$  158.3, 157.0, 139.8, 136.8, 128.7 (3C), 127.0 (2C), 121.6, 117.6, 24.8; HRMS (ESI)  $m/z$  calculated for  $\text{C}_{12}\text{H}_{12}\text{N}$   $[(\text{M}+\text{H})^+]$  170.0964, found 170.0968, found 292.03339. IR (film) 3060, 1590, 1571, 1445, 1234, 1160, 1028, 805  $\text{cm}^{-1}$ . Spectra data are consistent with those reported in the literature: *J. Am. Chem. Soc.* **134**, 1352–1356 (2012).

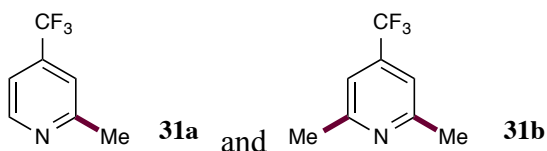

**2-Methyl-4-(trifluoromethyl)pyridine (31a) and 2,6-Dimethyl-4-(trifluoromethyl)pyridine (31b):** According to the general procedure A,  $\text{Ir}(\text{ppy})_2(\text{dtbbpy})\text{PF}_6$  (4.6 mg, 5.0  $\mu\text{mol}$ , 0.01 equiv.),  $\text{TsOH}$  (190.2 mg, 1.00 mmol, 2.0 equiv.), 4-(trifluoromethyl)pyridine (60.0  $\mu\text{L}$ , 0.50 mmol, 1.0 equiv.), ethyl 2-mercaptopropionate (3.5  $\mu\text{L}$ , 25.0  $\mu\text{mol}$ , 0.05 equiv.), 4.0 mL of MeOH and 4.0 mL of DMSO were used. After 48 hours, the reaction mixture was checked by  $^1\text{H}$  NMR using

TsOH as the internal standard (56% yield for **31a**; 25% yield for **31b**). The products are too volatile to isolated by routine procedure.

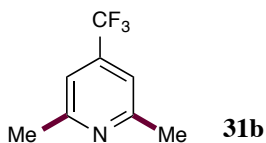

**2,6-Dimethyl-4-(trifluoromethyl)pyridine (31b):** According to the general procedure A, Ir(ppy)<sub>2</sub>(dtbbpy)PF<sub>6</sub> (4.6 mg, 5.0 μmol, 0.01 equiv.), TsOH (190.2 mg, 1.00 mmol, 2.0 equiv.), 4-(trifluoromethyl)pyridine (60.0 μL, 0.50 mmol, 1.0 equiv.), ethyl 2-mercaptopropionate (14.0 μL, 0.1 mmol, 0.20 equiv.), 6.0 mL of MeOH and 6.0 mL of DMSO were used. (Caution: volatile product). After 48 hours, the reaction mixture was added with 3 mL of 2 M NaOH aqueous solution and heated at 50 °C for 3 hours (or stirred at room temperature for 24 hours) and then cooled down to room temperature, diluted with CH<sub>2</sub>Cl<sub>2</sub> (20 mL), washed with brine (3×10 mL), dried over Na<sub>2</sub>SO<sub>4</sub>, and concentrated *in vacuo* with ice water bath carefully. The residue was purified by flash chromatography (dichloromethane) to provide the title compound as a colorless oil (71.0 mg, 81% yield). <sup>1</sup>H NMR (500 MHz, CDCl<sub>3</sub>): δ 7.15 (s, 2H), 2.58 (s, 6H); <sup>13</sup>C NMR (125 MHz, CDCl<sub>3</sub>): δ 159.2 (2C), 138.8 (q), 123.0 (q), 115.8 (q, 2C), 24.5 (2C); <sup>19</sup>F NMR (376 MHz, CDCl<sub>3</sub>): δ -64.9 (s); HRMS (ESI) m/z calculated for C<sub>8</sub>H<sub>9</sub>F<sub>3</sub>N [(M+H)<sup>+</sup>] 176.0682, found 176.0681. IR (film) 2929, 1582, 1388, 1350, 1235, 1129, 1107, 863 cm<sup>-1</sup>.

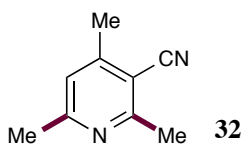

**2,4,6-Trimethylnicotinonitrile (32):** According to the general procedure A, Ir(ppy)<sub>2</sub>(dtbbpy)PF<sub>6</sub> (4.6 mg, 5.0 μmol, 0.01 equiv.), TsOH (190.2 mg, 1.00 mmol, 2.0 equiv.), 4-methylnicotinonitrile (61.0 mg, 0.50 mmol, 1.0 equiv.), ethyl 2-mercaptopropionate (3.5 μL, 25.0 μmol, 0.05 equiv.), 4.0 mL of MeOH and 4.0 mL of DMSO were used. (Caution: volatile product). After 48 hours, the reaction mixture was subjected to the workup procedure outlined in the general procedure and purified by flash chromatography (20% dichloromethane/hexanes) to provide the title compound as a white solid (66.5 mg, 91% yield). <sup>1</sup>H NMR (500 MHz, CDCl<sub>3</sub>): δ 6.95 (s, 1H), 2.71 (s, 3H), 2.53 (s, 3H), 2.47 (s, 3H); <sup>13</sup>C NMR (125 MHz, CDCl<sub>3</sub>): δ 161.3, 161.2, 151.2, 121.7, 116.6, 107.0, 24.7, 23.7, 20.3; HRMS (ESI) m/z calculated for C<sub>9</sub>H<sub>11</sub>N<sub>2</sub> [(M+H)<sup>+</sup>] 147.0917, found 147.0915. IR (film) 2926, 2219, 1606, 1556, 1449, 1374, 1320, 1028 cm<sup>-1</sup>.

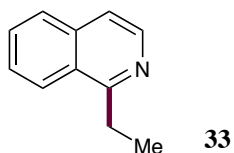

**1-Ethylisoquinoline (33):** According to the general procedure B, Ir(ppy)<sub>2</sub>(dtbbpy)PF<sub>6</sub> (4.6 mg, 5.0 μmol, 0.01 equiv.), TsOH (190.2 mg, 1.00 mmol, 2.0 equiv.), isoquinoline (61.0 μL, 0.50 mmol, 1.0 equiv.), methyl thioglycolate (2.5 μL, 25.0 μmol, 0.05 equiv.), ethanol (0.30 mL, 5.00 mmol, 10.0 equiv.) and 2.0 mL of DMSO were used. After 24 hours, the reaction mixture was subjected to the workup procedure outlined in the general procedure and purified by flash chromatography (10% ethyl acetate/hexanes) to provide the title compound as a colorless oil (74.6 mg, 95% yield). <sup>1</sup>H NMR (500 MHz, CDCl<sub>3</sub>): δ 8.43 (d, *J* = 5.7 Hz, 1H), 8.14 (d, *J* = 8.4 Hz, 1H), 7.79 (d, *J* = 8.1 Hz, 1H), 7.64 (dd, *J* =

7.8, 6.8 Hz, 1H), 7.56 (dd,  $J = 7.7, 6.8$  Hz, 1H), 7.48 (d,  $J = 5.7$  Hz, 1H), 3.32 (q,  $J = 7.6$  Hz, 2H), 1.44 (t,  $J = 7.6$  Hz, 3H);  $^{13}\text{C}$  NMR (125 MHz,  $\text{CDCl}_3$ ):  $\delta$  163.0, 141.8, 136.1, 129.7, 127.3, 126.9, 126.6, 125.1, 119.1, 28.4, 13.5; HRMS (ESI)  $m/z$  calculated for  $\text{C}_{11}\text{H}_{12}\text{N}$   $[(\text{M}+\text{H})^+]$  158.0964, found 158.0968. IR (film) 2971, 2934, 1621, 1561, 1501, 1385, 1006, 869  $\text{cm}^{-1}$ .

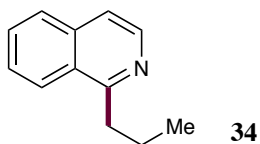

**1-Propylisoquinoline (34):** According to the general procedure B,  $\text{Ir}(\text{ppy})_2(\text{dtbbpy})\text{PF}_6$  (4.6 mg, 5.0  $\mu\text{mol}$ , 0.01 equiv.), TsOH (190.2 mg, 1.00 mmol, 2.0 equiv.), isoquinoline (61.0  $\mu\text{L}$ , 0.50 mmol, 1.0 equiv.), methyl thioglycolate (2.5  $\mu\text{L}$ , 25.0  $\mu\text{mol}$ , 0.05 equiv.), 1-propanol (0.38 mL, 5.00 mmol, 10.0 equiv.) and 2.0 mL of DMSO were used. After 24 hours, the reaction mixture was subjected to the workup procedure outlined in the general procedure and purified by flash chromatography (10% ethyl acetate/hexanes) to provide the title compound as a colorless oil (82.2 mg, 96% yield).  $^1\text{H}$  NMR (500 MHz,  $\text{CDCl}_3$ ):  $\delta$  8.42 (d,  $J = 5.7$  Hz, 1H), 8.14 (d,  $J = 8.4$  Hz, 1H), 7.79 (d,  $J = 8.1$  Hz, 1H), 7.64 (t,  $J = 7.5$  Hz, 1H), 7.57 (dd,  $J = 7.7, 6.8$  Hz, 1H), 7.48 (d,  $J = 5.8$  Hz, 1H), 3.27 (t,  $J = 7.8$  Hz, 2H), 1.90 (m, 2H), 1.06 (t,  $J = 7.4$  Hz, 3H);  $^{13}\text{C}$  NMR (125 MHz,  $\text{CDCl}_3$ ):  $\delta$  162.1, 141.8, 136.2, 129.7, 127.3, 126.9, 126.8, 125.3, 119.1, 37.4, 23.0, 14.3; HRMS (ESI)  $m/z$  calculated for  $\text{C}_{12}\text{H}_{14}\text{N}$   $[(\text{M}+\text{H})^+]$  172.1121, found 172.1126. IR (film) 2959, 2870, 1622, 1561, 1501, 1386, 1009, 863  $\text{cm}^{-1}$ .



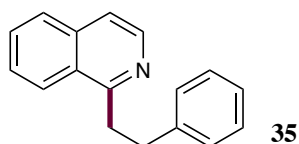

**1-Phenethylisoquinoline (35):** According to the general procedure B, Ir(ppy)<sub>2</sub>(dtbbpy)PF<sub>6</sub> (4.6 mg, 5.0 μmol, 0.01 equiv.), TsOH (190.2 mg, 1.00 mmol, 2.0 equiv.), isoquinoline (61.0 μL, 0.50 mmol, 1.0 equiv.), methyl thioglycolate (2.5 μL, 25.0 μmol, 0.05 equiv.), 2-phenylethanol (0.60 mL, 5.00 mmol, 10.0 equiv.) and 2.0 mL of DMSO were used. After 48 hours, the reaction mixture was subjected to the workup procedure outlined in the general procedure and purified by flash chromatography (5% ethyl acetate/hexanes) to provide the title compound as a colorless oil (106.2 mg, 91% yield). <sup>1</sup>H NMR (500 MHz, CDCl<sub>3</sub>): δ 8.48 (d, *J* = 5.6 Hz, 1H), 8.16 (d, *J* = 8.4 Hz, 1H), 7.83 (d, *J* = 8.1 Hz, 1H), 7.68 (t, *J* = 7.5 Hz, 1H), 7.59 (t, *J* = 7.7 Hz, 1H), 7.55 (d, *J* = 5.7 Hz, 1H), 7.32 (m, 4H), 7.23 (m, 1H), 3.62 (t, *J* = 8.3 Hz, 2H), 3.21 (t, *J* = 8.3 Hz, 2H); <sup>13</sup>C NMR (125 MHz, CDCl<sub>3</sub>): δ 161.0, 141.8, 141.7, 136.2, 129.9, 128.5 (2C), 128.4 (2C), 127.4, 127.1, 126.9, 126.0, 125.0, 119.4, 37.2, 35.5; HRMS (ESI) *m/z* calculated for C<sub>17</sub>H<sub>16</sub>N [(M+H)<sup>+</sup>] 234.1277, found 234.1277. IR (film) 3025, 1621, 1561, 1494, 1452, 1387, 1357, 821 cm<sup>-1</sup>.

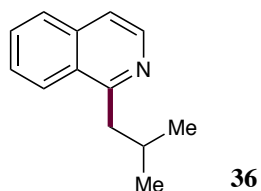

**1-Isobutylisoquinoline (36):** According to the general procedure B, Ir(ppy)<sub>2</sub>(dtbbpy)PF<sub>6</sub> (4.6 mg, 5.0 μmol, 0.01 equiv.), TsOH (190.2 mg, 1.00 mmol, 2.0 equiv.), isoquinoline (61.0 μL, 0.50 mmol, 1.0 equiv.), methyl thioglycolate (2.5 μL, 25.0 μmol, 0.05 equiv.),

isobutanol (0.46 mL, 5.00 mmol, 10.0 equiv.) and 2.0 mL of DMSO were used. After 48 hours, the reaction mixture was subjected to the workup procedure outlined in the general procedure and purified by flash chromatography (10% ethyl acetate/hexanes) to provide the title compound as a colorless oil (85.6 mg, 87% yield).  $^1\text{H}$  NMR (500 MHz,  $\text{CDCl}_3$ ):  $\delta$  8.45 (d,  $J = 5.7$  Hz, 1H), 8.16 (d,  $J = 8.4$  Hz, 1H), 7.81 (d,  $J = 8.1$  Hz, 1H), 7.66 (t,  $J = 7.9$  Hz, 1H), 7.58 (t,  $J = 7.6$  Hz, 1H), 7.51 (d,  $J = 5.7$  Hz, 1H), 3.18 (d,  $J = 7.3$  Hz, 2H), 2.29 (m, 1H), 1.00 (d,  $J = 6.6$  Hz, 6H);  $^{13}\text{C}$  NMR (125 MHz,  $\text{CDCl}_3$ ):  $\delta$  161.6, 141.6, 136.3, 129.8, 127.4, 127.3, 126.9, 125.6, 119.2, 44.1, 29.6, 22.8 (2C); HRMS (ESI)  $m/z$  calculated for  $\text{C}_{13}\text{H}_{16}\text{N}$  [(M+H) $^+$ ] 186.1277, found 186.1278. IR (film) 2955, 2867, 1623, 1585, 1561, 1463, 1383, 1165  $\text{cm}^{-1}$ .

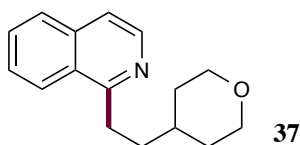

**1-(2-(tetrahydro-2H-pyran-4-yl)ethyl)isoquinoline (37):** According to the general procedure B,  $\text{Ir}(\text{ppy})_2(\text{dtbbpy})\text{PF}_6$  (4.6 mg, 5.0  $\mu\text{mol}$ , 0.01 equiv.), TsOH (190.2 mg, 1.00 mmol, 2.0 equiv.), isoquinoline (61.0  $\mu\text{L}$ , 0.50 mmol, 1.0 equiv.), methyl thioglycolate (5.0  $\mu\text{L}$ , 50.0  $\mu\text{mol}$ , 0.10 equiv.), 2-(tetrahydro-2H-pyran-4-yl)ethanol (0.65 g, 5.00 mmol, 10.0 equiv.) and 2.0 mL of DMSO were used. After 48 hours, the reaction mixture was subjected to the workup procedure outlined in the general procedure and purified by flash chromatography (20% ethyl acetate/hexanes) to provide the title compound as a colorless oil (108.6 mg, 90% yield).  $^1\text{H}$  NMR (500 MHz,  $\text{CDCl}_3$ ):  $\delta$  8.42 (d,  $J = 5.7$  Hz, 1H), 8.13 (d,  $J = 8.5$  Hz, 1H), 7.81 (d,  $J = 8.1$  Hz, 1H), 7.67 (t,  $J = 7.5$  Hz, 1H), 7.59 (t,  $J = 7.6$  Hz, 1H), 7.51 (d,  $J = 5.7$  Hz, 1H), 3.98 (dd,  $J = 11.1, 4.0$  Hz, 2H), 3.40 (td,  $J = 11.8, 2.0$  Hz,

2H), 3.32 (m, 2H), 1.82 (m, 2H), 1.74 (d,  $J = 13.7$  Hz, 2H), 1.67 (m, 1H), 1.40 (m, 2H);  $^{13}\text{C}$  NMR (125 MHz,  $\text{CDCl}_3$ ):  $\delta$  162.0, 141.7, 136.3, 129.9, 127.5, 127.1, 126.8, 125.1, 119.3, 68.1(2C), 36.6, 35.2, 33.0(2C), 32.3; HRMS (ESI)  $m/z$  calculated for  $\text{C}_{16}\text{H}_{20}\text{NO}$   $[(\text{M}+\text{H})^+]$  242.1539, found 242.1539. IR (film) 2918, 2840, 1622, 1562, 1443, 1386, 1233, 1135, 1016  $\text{cm}^{-1}$ .

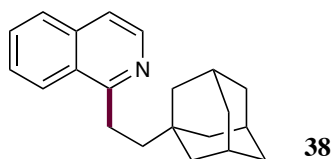

**1-(2-(adamantan-1-yl)ethyl)isoquinoline (38):** According to the general procedure B,  $\text{Ir}(\text{ppy})_2(\text{dtbbpy})\text{PF}_6$  (4.6 mg, 5.0  $\mu\text{mol}$ , 0.01 equiv.),  $\text{TsOH}$  (190.2 mg, 1.00 mmol, 2.0 equiv.), isoquinoline (61.0  $\mu\text{L}$ , 0.50 mmol, 1.0 equiv.), methyl thioglycolate (2.5  $\mu\text{L}$ , 25.0  $\mu\text{mol}$ , 0.05 equiv.), 1-adamantaneethanol (460.0 mg, 2.50 mmol, 5.0 equiv.) and 2.0 mL of DMSO were used. After 48 hours, the reaction mixture was subjected to the workup procedure outlined in the general procedure and purified by flash chromatography (5% ethyl acetate/hexanes) to provide the title compound as a white solid (134.0 mg, 92% yield).  $^1\text{H}$  NMR (500 MHz,  $\text{CDCl}_3$ ):  $\delta$  8.42 (d,  $J = 5.7$  Hz, 1H), 8.13 (d,  $J = 8.4$  Hz, 1H), 7.81 (d,  $J = 8.1$  Hz, 1H), 7.66 (t,  $J = 7.5$  Hz, 1H), 7.59 (,  $J = 7.6$  Hz, 1H), 7.49 (d,  $J = 5.8$  Hz, 1H), 3.27 (m, 2H), 2.02 (s, 3H), 1.72 (m, 6H), 1.66 (s, 6H), 1.60 (m, 2H);  $^{13}\text{C}$  NMR (125 MHz,  $\text{CDCl}_3$ ):  $\delta$  163.3, 141.6, 136.3, 129.9, 127.4, 127.0, 126.8, 125.4, 119.2, 44.3, 42.3 (3C), 37.2 (3C), 32.7, 28.9, 28.7 (3C); HRMS (ESI)  $m/z$  calculated for  $\text{C}_{21}\text{H}_{26}\text{N}$   $[(\text{M}+\text{H})^+]$  292.2060, found 292.2060. IR (film) 2905, 2843, 1621, 1561, 1451, 1387, 1357, 820  $\text{cm}^{-1}$ .

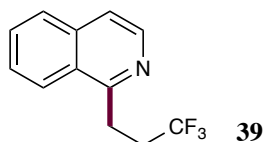

**1-(3,3,3-trifluoropropyl)isoquinoline (39):** According to the general procedure B, Ir(ppy)<sub>2</sub>(dtbbpy)PF<sub>6</sub> (4.6 mg, 5.0 μmol, 0.01 equiv.), TsOH (190.2 mg, 1.00 mmol, 2.0 equiv.), isoquinoline (61.0 μL, 0.50 mmol, 1.0 equiv.), 2,2,2-trifluoroethanethiol (2.5 μL, 25.0 μmol, 0.05 equiv., volatile, added after the reaction mixture was degassed), 3,3,3-trifluoropropanol (0.46 mL, 5.00 mmol, 10.0 equiv.) and 2.0 mL of DMSO were used. After 48 hours, the reaction mixture was subjected to the workup procedure outlined in the general procedure and purified by flash chromatography (10% ethyl acetate/hexanes) to provide the title compound as a colorless oil (104.5 mg, 93% yield). <sup>1</sup>H NMR (500 MHz, CDCl<sub>3</sub>): δ 8.43 (d, *J* = 5.7 Hz, 1H), 8.12 (d, *J* = 8.4 Hz, 1H), 7.84 (d, *J* = 8.0 Hz, 1H), 7.70 (t, *J* = 7.5 Hz, 1H), 7.64 (t, *J* = 7.7 Hz, 1H), 7.56 (d, *J* = 5.7 Hz, 1H), 3.56 (m, 2H), 2.80 (m, 2H); <sup>13</sup>C NMR (125 MHz, CDCl<sub>3</sub>): δ 157.7, 141.6, 136.1, 130.1, 128.4, 127.5, 126.8, 126.3, 124.4, 119.9, 32.1 (q), 26.8 (q); <sup>19</sup>F NMR (376 MHz, CDCl<sub>3</sub>): δ -66.5 (t, *J* = 10.9 Hz); HRMS (ESI) *m/z* calculated for C<sub>12</sub>H<sub>11</sub>F<sub>3</sub>N [(M+H)<sup>+</sup>] 226.0838, found 226.0838. IR (film) 3056, 1566, 1377, 1346, 1245, 1129, 1102, 977 cm<sup>-1</sup>.

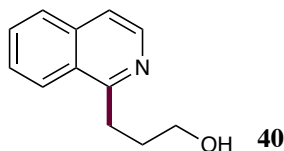

**3-(Isoquinolin-1-yl)propan-1-ol (40):** According to the general procedure B, Ir(ppy)<sub>2</sub>(dtbbpy)PF<sub>6</sub> (4.6 mg, 5.0 μmol, 0.01 equiv.), TsOH (190.2 mg, 1.00 mmol, 2.0 equiv.), isoquinoline (61.0 μL, 0.50 mmol, 1.0 equiv.), methyl thioglycolate (2.5 μL, 25.0 μmol, 0.05 equiv.), 1,3-propanediol (0.37 mL, 5.00 mmol, 10.0 equiv.) and 2.0 mL of

DMSO were used. After 24 hours, the reaction mixture was subjected to the workup procedure outlined in the general procedure and purified by flash chromatography (80% ethyl acetate/hexanes) to provide the title compound as a colorless oil (82.3 mg, 88% yield).  $^1\text{H}$  NMR (500 MHz,  $\text{CDCl}_3$ ):  $\delta$  8.37 (d,  $J = 5.7$  Hz, 1H), 8.19 (d,  $J = 8.4$  Hz, 1H), 7.81 (d,  $J = 8.1$  Hz, 1H), 7.68 (t,  $J = 7.5$  Hz, 1H), 7.60 (t,  $J = 7.7$  Hz, 1H), 7.52 (d,  $J = 5.8$  Hz, 1H), 4.48 (br s, 1H), 3.75 (t,  $J = 5.7$  Hz, 2H), 3.50 (t,  $J = 6.9$  Hz, 2H), 2.16 (p,  $J = 6.2$  Hz, 2H);  $^{13}\text{C}$  NMR (125 MHz,  $\text{CDCl}_3$ ):  $\delta$  161.4, 140.9, 136.2, 130.2, 127.4, 127.3, 126.9, 125.2, 119.6, 62.2, 31.9, 30.9; HRMS (ESI)  $m/z$  calculated for  $\text{C}_{12}\text{H}_{14}\text{NO}$   $[(\text{M}+\text{H})^+]$  188.1070, found 188.1068. IR (film) 3250, 2930, 1622, 1561, 1503, 1388, 1056, 1009  $\text{cm}^{-1}$ .

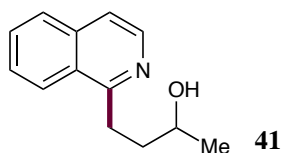

**4-(Isoquinolin-1-yl)butan-2-ol (41):** According to the general procedure B,  $\text{Ir}(\text{ppy})_2(\text{dtbbpy})\text{PF}_6$  (4.6 mg, 5.0  $\mu\text{mol}$ , 0.01 equiv.), TsOH (190.2 mg, 1.00 mmol, 2.0 equiv.), isoquinoline (61.0  $\mu\text{L}$ , 0.50 mmol, 1.0 equiv.), ethyl 2-mercaptopropionate (35.0  $\mu\text{L}$ , 0.25 mmol, 0.50 equiv.), 1,3-butanediol (0.46 mL, 5.00 mmol, 10.0 equiv.) and 2.0 mL of DMSO were used. After 72 hours, the reaction mixture was subjected to the workup procedure outlined in the general procedure and purified by flash chromatography (10% ethyl acetate/hexanes) to provide the title compound as a colorless oil (81.5 mg, 81% yield).  $^1\text{H}$  NMR (500 MHz,  $\text{CDCl}_3$ ):  $\delta$  8.38 (d,  $J = 5.7$  Hz, 1H), 8.19 (d,  $J = 8.4$  Hz, 1H), 7.82 (d,  $J = 8.2$  Hz, 1H), 7.69 (t,  $J = 7.5$  Hz, 1H), 7.61 (t,  $J = 7.7$  Hz, 1H), 7.53 (d,  $J = 5.7$  Hz, 1H), 4.22 (br s, 1H), 3.86 (m, 1H), 3.51 (t,  $J = 7.0$  Hz, 2H), 2.03 (m,

2H), 1.25 (d,  $J = 6.2$  Hz, 3H);  $^{13}\text{C}$  NMR (125 MHz,  $\text{CDCl}_3$ ):  $\delta$  161.6, 140.9, 136.3, 130.2, 127.4, 127.3, 126.9, 125.2, 119.6, 67.3, 37.2, 31.3, 23.5; HRMS (ESI)  $m/z$  calculated for  $\text{C}_{13}\text{H}_{16}\text{NO}$   $[(\text{M}+\text{H})^+]$  202.1226, found 202.1227. IR (film) 3301, 2964, 1623, 1562, 1503, 1388, 1127, 823  $\text{cm}^{-1}$ .

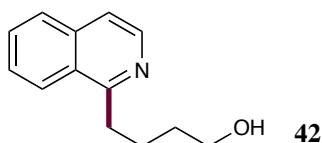

**4-(Isoquinolin-1-yl)butan-1-ol (42):** According to the general procedure B,  $\text{Ir}(\text{ppy})_2(\text{dtbbpy})\text{PF}_6$  (4.6 mg, 5.0  $\mu\text{mol}$ , 0.01 equiv.), TsOH (190.2 mg, 1.00 mmol, 2.0 equiv.), isoquinoline (61.0  $\mu\text{L}$ , 0.50 mmol, 1.0 equiv.), methyl thioglycolate (2.5  $\mu\text{L}$ , 25.0  $\mu\text{mol}$ , 0.05 equiv.), tetrahydrofuran (0.40 mL, 5.00 mmol, 10.0 equiv.) and 2.0 mL of DMSO were used. After 24 hours, the reaction mixture was subjected to the workup procedure outlined in the general procedure and purified by flash chromatography (80% ethyl acetate/hexanes) to provide the title compound as a colorless oil (90.5 mg, 90% yield).  $^1\text{H}$  NMR (500 MHz,  $\text{CDCl}_3$ ):  $\delta$  8.37 (d,  $J = 5.7$  Hz, 1H), 8.15 (d,  $J = 8.3$  Hz, 1H), 7.79 (d,  $J = 8.1$  Hz, 1H), 7.65 (t,  $J = 7.5$  Hz, 1H), 7.57 (t,  $J = 7.7$  Hz, 1H), 7.49 (d,  $J = 5.6$  Hz, 1H), 3.71 (t,  $J = 6.3$  Hz, 2H), 3.58 (br s, 1H), 3.34 (t,  $J = 7.6$  Hz, 2H), 1.98 (p,  $J = 7.4$  Hz, 2H), 1.73 (p,  $J = 6.6$  Hz, 2H);  $^{13}\text{C}$  NMR (125 MHz,  $\text{CDCl}_3$ ):  $\delta$  161.8, 141.2, 136.2, 130.0, 127.3, 127.1, 126.9, 125.2, 119.4, 62.0, 34.2, 32.3, 25.3; HRMS (ESI)  $m/z$  calculated for  $\text{C}_{13}\text{H}_{16}\text{NO}$   $[(\text{M}+\text{H})^+]$  202.1226, found 202.1225. IR (film) 3265, 2931, 1622, 1561, 1503, 1388, 1059, 1013  $\text{cm}^{-1}$ .

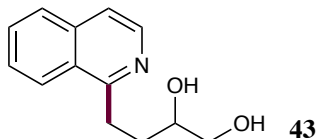

**4-(Isoquinolin-1-yl)butane-1,2-diol (43):** According to the general procedure B, Ir(ppy)<sub>2</sub>(dtbbpy)PF<sub>6</sub> (4.6 mg, 5.0 μmol, 0.01 equiv.), TsOH (190.2 mg, 1.00 mmol, 2.0 equiv.), isoquinoline (61.0 μL, 0.50 mmol, 1.0 equiv.), ethyl 2-mercaptopropionate (7.0 μL, 0.05 mmol, 0.10 equiv.), 3-hydroxytetrahydrofuran (0.42 mL, 5.00 mmol, 10.0 equiv.) and 2.0 mL of DMSO were used. After 48 hours, the reaction mixture was diluted with 1 M NaOH aqueous solution (2 mL) and CH<sub>2</sub>Cl<sub>2</sub> (20 mL), washed with brine (3×10 mL). The aqueous phase was extracted with CH<sub>2</sub>Cl<sub>2</sub> (3×20 mL). The combined organic phase was then dried over Na<sub>2</sub>SO<sub>4</sub>, and concentrated *in vacuo*, and purified by flash chromatography (5% methanol/ethyl acetate) to provide the title compound as a white solid (78.3 mg, 72% yield). <sup>1</sup>H NMR (500 MHz, CDCl<sub>3</sub>): δ 8.34 (d, *J* = 5.7 Hz, 1H), 8.16 (d, *J* = 8.4 Hz, 1H), 7.79 (d, *J* = 8.1 Hz, 1H), 7.67 (t, *J* = 7.5 Hz, 1H), 7.58 (t, *J* = 7.7 Hz, 1H), 7.50 (d, *J* = 5.7 Hz, 1H), 5.51 (br s, 1H), 3.90-3.40 (br s, 1H), 3.81 (m, 1H), 3.66 (dd, *J* = 11.2, 3.6 Hz, 1H), 3.57 (dd, *J* = 11.1, 6.7 Hz, 1H), 3.51 (t, *J* = 6.9 Hz, 2H), 2.06 (m, 2H); <sup>13</sup>C NMR (125 MHz, CDCl<sub>3</sub>): δ 161.3, 140.7, 136.2, 130.3, 127.4, 127.3, 126.9, 125.2, 119.7, 71.7, 66.6, 31.4, 30.9; HRMS (ESI) *m/z* calculated for C<sub>13</sub>H<sub>16</sub>NO<sub>2</sub> [(M+H)<sup>+</sup>] 218.1176, found 218.1175. IR (film) 3325, 3091, 2849, 1559, 1388, 1100, 1038, 1015 cm<sup>-1</sup>.

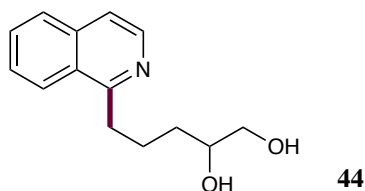

**5-(Isoquinolin-1-yl)pentane-1,2-diol (44):** According to the general procedure B, Ir(ppy)<sub>2</sub>(dtbbpy)PF<sub>6</sub> (4.6 mg, 5.0 μmol, 0.01 equiv.), TsOH (190.2 mg, 1.00 mmol, 2.0 equiv.), isoquinoline (61.0 μL, 0.50 mmol, 1.0 equiv.), ethyl 2-mercaptopropionate (7.0 μL, 0.05 mmol, 0.10 equiv.), tetrahydrofurfuryl alcohol (0.50 mL, 5.00 mmol, 10.0 equiv.) and 2.0 mL of DMSO were used. After 48 hours, the reaction mixture was diluted with 1 M NaOH aqueous solution (2 mL) and CH<sub>2</sub>Cl<sub>2</sub> (20 mL), washed with brine (3×10 mL). The aqueous phase was extracted with CH<sub>2</sub>Cl<sub>2</sub> (3×20 mL). The combined organic phase was then dried over Na<sub>2</sub>SO<sub>4</sub>, and concentrated *in vacuo*. and purified by flash chromatography (5% methanol/ethyl acetate) to provide the title compound as a colorless oil (89.0 mg, 77% yield). <sup>1</sup>H NMR (500 MHz, CDCl<sub>3</sub>): δ 8.36 (d, *J* = 5.7 Hz, 1H), 8.15 (d, *J* = 8.4 Hz, 1H), 7.81 (d, *J* = 8.2 Hz, 1H), 7.67 (t, *J* = 7.5 Hz, 1H), 7.59 (t, *J* = 7.7 Hz, 1H), 7.51 (d, *J* = 5.8 Hz, 1H), 3.90-3.40 (br s, 2H), 3.80 (m, 1H), 3.65 (dd, *J* = 11.2, 3.3 Hz, 1H), 3.51 (dd, *J* = 11.1, 7.2 Hz, 1H), 3.37 (m, 2H), 2.04 (m, 2H), 1.60 (m, 2H); <sup>13</sup>C NMR (125 MHz, CDCl<sub>3</sub>): δ 161.5, 140.9, 136.3, 130.2, 127.4, 127.3, 127.0, 125.2, 119.6, 71.5, 66.8, 33.9, 32.6, 24.6; HRMS (ESI) *m/z* calculated for C<sub>14</sub>H<sub>18</sub>NO<sub>2</sub> [(M+H)<sup>+</sup>] 232.1332, found 232.1333. IR (film) 3309, 2924, 1562, 1388, 1264, 1103, 1053, 822 cm<sup>-1</sup>

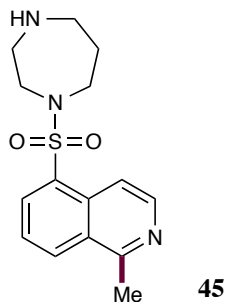

**1-Methylfasudil (45):** According to the general procedure A, Ir(ppy)<sub>2</sub>(dtbbpy)PF<sub>6</sub> (2.3 mg, 2.5 μmol, 0.01 equiv.), TsOH (95.1 mg, 0.50 mmol, 2.0 equiv.), fasudil



dihydrochloride (93.0 mg, 0.25 mmol, 1.0 equiv.), ethyl 2-mercaptopropionate (3.5  $\mu\text{L}$ , 25.0  $\mu\text{mol}$ , 0.10 equiv.), 4.0 mL of MeOH and 1.0 mL of DMSO were used. After 24 hours, the reaction mixture was subjected to the workup procedure outlined in the general procedure and purified by flash chromatography (5% methanol/ethyl acetate) to provide the title compound as a colorless oil (62.5 mg, 82% yield).  $^1\text{H}$  NMR (500 MHz,  $\text{CDCl}_3$ ):  $\delta$  8.51 (d,  $J = 6.2$  Hz, 1H), 8.35 (d,  $J = 8.4$  Hz, 1H), 8.30 (d,  $J = 7.8$  Hz, 1H), 8.29 (d,  $J = 7.0$  Hz, 1H), 7.64 (t,  $J = 7.9$  Hz, 1H), 3.47 (t,  $J = 6.2$  Hz, 2H), 3.42 (t,  $J = 5.4$  Hz, 2H), 3.00 (s, 3H), 2.95 (t,  $J = 5.4$  Hz, 2H), 2.92 (t,  $J = 6.2$  Hz, 2H), 2.12 (br s, 1H), 1.81 (p,  $J = 6.1$  Hz, 2H);  $^{13}\text{C}$  NMR (125 MHz,  $\text{CDCl}_3$ ):  $\delta$  159.4, 143.7, 135.0, 132.5, 131.8, 131.1, 128.1, 125.4, 116.0, 51.1, 50.2, 47.6, 47.3, 31.1, 23.1; HRMS (ESI)  $m/z$  calculated for  $\text{C}_{15}\text{H}_{20}\text{N}_3\text{O}_2\text{S}$   $[(\text{M}+\text{H})^+]$  306.1271, found 306.1270. IR (film) 2932, 1611, 1561, 1317, 1144, 1023, 978, 903  $\text{cm}^{-1}$ .

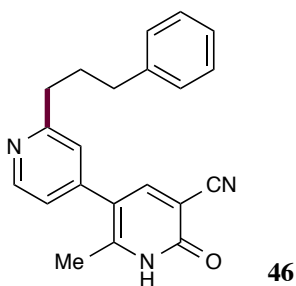

**2-(3-Phenylpropyl)milrinone (46):** According to the general procedure B,  $\text{Ir}(\text{ppy})_2(\text{dtbbpy})\text{PF}_6$  (2.3 mg, 2.5  $\mu\text{mol}$ , 0.01 equiv.), TsOH (95.1 mg, 0.50 mmol, 2.0 equiv.), milrinone (53.9 mg, 0.25 mmol, 1.0 equiv.), methyl thioglycolate (2.5  $\mu\text{L}$ , 25.0  $\mu\text{mol}$ , 0.10 equiv.), 3-phenyl-1-propanol (0.35 mL, 2.5 mmol, 10.0 equiv) and 1.0 mL of DMSO were used. After 72 hours, the reaction mixture was subjected to the workup procedure outlined in the general procedure and purified by flash chromatography (5%

methanol/ethyl acetate) to provide the title compound as a white solid (35.3 mg, 43% yield).  $^1\text{H}$  NMR (500 MHz,  $\text{CD}_3\text{OD}$ ):  $\delta$  8.49 (d,  $J = 5.1$  Hz, 1H), 8.05 (s, 1H), 7.29 (s, 1H), 7.25 (d,  $J = 5.1$  Hz, 1H), 7.24 (m, 2H), 7.19 (m, 2H), 7.13 (m, 1H), 2.86 (t,  $J = 7.8$  Hz, 2H), 2.69 (t,  $J = 7.7$  Hz, 2H), 2.36 (s, 3H), 2.06 (m, 2H);  $^{13}\text{C}$  NMR (125 MHz,  $\text{CD}_3\text{OD}$ ):  $\delta$  163.7, 162.6, 152.5, 151.0, 150.0, 146.9, 143.2, 129.5(2C), 129.4(2C), 126.9, 125.0, 123.2, 118.8, 116.5, 102.7, 38.4, 36.6, 32.9, 18.6; HRMS (ESI)  $m/z$  calculated for  $\text{C}_{21}\text{H}_{20}\text{N}_3\text{O}$  [(M+H) $^+$ ] 330.1601, found 330.1601. IR (film) 2925, 2225, 1656, 1599, 1567, 1483, 1173, 1030, 910  $\text{cm}^{-1}$ .

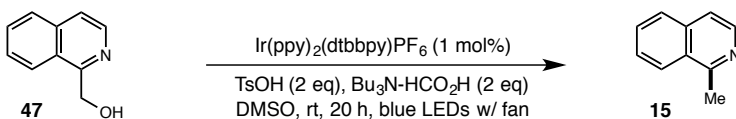

**Reduction of 1-(Hydroxymethyl)isoquinoline via Photoredox Catalysis:** To an 8 mL vial equipped with a Teflon septum and a magnetic stir bar was charged Ir(ppy)<sub>2</sub>(dtbbpy)PF<sub>6</sub> (2.3 mg, 2.5  $\mu\text{mol}$ , 0.01 equiv.), TsOH (95.1 mg, 0.50 mmol, 2.0 equiv.), 1-(hydroxymethyl)isoquinoline (40.1 mg, 0.25 mmol, 1.0 equiv.), Bu<sub>3</sub>N (120  $\mu\text{L}$ , 0.50 mmol, 2.0 equiv.), HCO<sub>2</sub>H (21  $\mu\text{L}$ , 0.50 mmol, 2.0 equiv.) and 1.0 mL of DMSO. The reaction mixture was degassed by sparging with nitrogen for 10 min with an outlet needle, then irradiated with the blue LEDs (approximately 2 cm away from the light source) at room temperature under a mini fan. After 20 hours, the reaction mixture was diluted with 1 M NaOH aqueous solution (1 mL) and CH<sub>2</sub>Cl<sub>2</sub> (20 mL), washed with brine (3 $\times$ 10 mL), dried over Na<sub>2</sub>SO<sub>4</sub>, and concentrated *in vacuo*. Purification of the crude product by flash chromatography on silica gel (20% ethyl acetate/hexanes) to provide 1-methylisoquinoline as a colorless oil (21.5 mg, 60% yield).

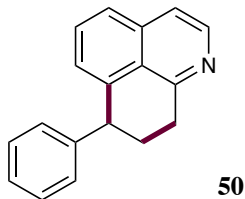

**7-Phenyl-8,9-dihydro-7H-benzo[de]quinoline (50):** To an 8 mL vial equipped with a Teflon septum and a magnetic stir bar was charged Ir(ppy)<sub>2</sub>(dtbbpy)PF<sub>6</sub> (2.3 mg, 2.5 μmol, 0.01 equiv.), TsOH (95.1 mg, 0.50 mmol, 2.0 equiv.), 1-(hydroxymethyl)isoquinoline (40.1 mg, 0.25 mmol, 1.0 equiv.), styrene (30 μL, 0.25 mmol, 1.0 equiv.) and 1.0 mL of DMSO. The reaction mixture was degassed by sparging with nitrogen for 10 min with an outlet needle, then irradiated with the blue LEDs (approximately 2 cm away from the light source) at room temperature under a mini fan. After 20 hours, the reaction mixture was diluted with 1 M NaOH aqueous solution (1 mL) and CH<sub>2</sub>Cl<sub>2</sub> (20 mL), washed with brine (3×10 mL), dried over Na<sub>2</sub>SO<sub>4</sub>, and concentrated *in vacuo*. Purification of the crude product by flash chromatography on silica gel (20% ethyl acetate/hexanes) to provide the title compound as a colorless oil (39.8 mg, 65% yield). <sup>1</sup>H NMR (500 MHz, CDCl<sub>3</sub>): δ 8.43 (d, *J* = 5.8 Hz, 1H), 7.69 (d, *J* = 8.2 Hz, 1H), 7.58-7.53 (m, 2H), 7.32 (m, 2H), 7.27(m. 1H), 7.11 (m, 2H), 7.09 (d, *J* = 7.2 Hz, 1H), 4.44 (dd, *J* = 8.3, 4.5 Hz, 1H), 3.30 (t, *J* = 6.3 Hz, 2H), 2.49 (m, 1H), 2.39 (m, 1H); <sup>13</sup>C NMR (125 MHz, CDCl<sub>3</sub>): δ 159.7, 144.3, 141.5, 140.9, 136.1, 130.3, 128.6(2C), 128.5(2C), 126.6, 126.4, 125.3, 125.0, 119.1, 46.0, 32.0, 31.5; HRMS (ESI) *m/z* calculated for C<sub>18</sub>H<sub>16</sub>N [(M+H)<sup>+</sup>] 246.1277, found 246.1277. IR (film) 3052, 2927, 1613, 1571, 1492, 1345, 1265, 1026, 838 cm<sup>-1</sup>.

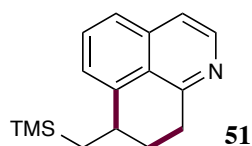

**7-((Trimethylsilyl)methyl)-8,9-dihydro-7H-benzo[de]quinoline (51):** Following the procedure for compound **50**, Ir(ppy)<sub>2</sub>(dtbbpy)PF<sub>6</sub> (2.3 mg, 2.5 μmol, 0.01 equiv.), TsOH (95.1 mg, 0.50 mmol, 2.0 equiv.), 1-(hydroxymethyl)isoquinoline (40.1 mg, 0.25 mmol, 1.0 equiv.), allyltrimethylsilane (41 μL, 0.25 mmol, 1.0 equiv.) and 1.0 mL of DMSO were used. After 20 hours, the reaction mixture was diluted with 1 M NaOH aqueous solution (1 mL) and CH<sub>2</sub>Cl<sub>2</sub> (20 mL), washed with brine (3×10 mL), dried over Na<sub>2</sub>SO<sub>4</sub>, and concentrated *in vacuo*. Purification of the crude product by flash chromatography on silica gel (20% ethyl acetate/hexanes) to provide the title compound as a colorless oil (26.2 mg, 41% yield). <sup>1</sup>H NMR (500 MHz, CDCl<sub>3</sub>): δ 8.38 (d, *J* = 5.8 Hz, 1H), 7.63-7.56 (m, 2H), 7.47 (d, *J* = 5.7 Hz, 1H), 7.37 (d, *J* = 6.6 Hz, 1H), 3.40 (m, 1H), 3.30 (m, 1H), 3.19 (m, 1H), 2.25 (m, 1H), 2.05 (m, 1H), 1.03 (d, *J* = 7.5 Hz, 2H), 0.10 (s, 9H); <sup>13</sup>C NMR (125 MHz, CDCl<sub>3</sub>): δ 159.5, 145.1, 141.7, 136.2, 130.1, 124.3, 124.2, 124.0, 118.9, 35.3, 30.3, 29.6, 23.7, -0.6(3C); HRMS (ESI) *m/z* calculated for C<sub>16</sub>H<sub>22</sub>NSi [(M+H)<sup>+</sup>] 256.1516, found 256.1517. IR (film) 3049, 2949, 1616, 1572, 1387, 1344, 1246, 1028, 856 cm<sup>-1</sup>.

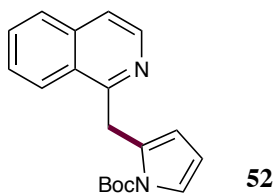

**Tert-butyl 2-(isoquinolin-1-ylmethyl)-1H-pyrrole-1-carboxylate (52):** Following the procedure for compound **50**, Ir(ppy)<sub>2</sub>(dtbbpy)PF<sub>6</sub> (2.3 mg, 2.5 μmol, 0.01 equiv.), TsOH

(95.1 mg, 0.50 mmol, 2.0 equiv.), 1-(hydroxymethyl)isoquinoline (40.1 mg, 0.25 mmol, 1.0 equiv.), *N*-Boc-pyrrole (43  $\mu$ L, 0.25 mmol, 1.0 equiv.) and 1.0 mL of DMSO were used. After 20 hours, the reaction mixture was diluted with 1 M NaOH aqueous solution (1 mL) and  $\text{CH}_2\text{Cl}_2$  (20 mL), washed with brine ( $3 \times 10$  mL), dried over  $\text{Na}_2\text{SO}_4$ , and concentrated *in vacuo*. Purification of the crude product by flash chromatography on silica gel (20% ethyl acetate/hexanes) to provide the title compound as a colorless oil (24.0 mg, 31% yield).  $^1\text{H}$  NMR (500 MHz,  $\text{CDCl}_3$ ):  $\delta$  8.45 (d,  $J = 5.8$  Hz, 1H), 8.13 (d,  $J = 8.5$  Hz, 1H), 7.83 (d,  $J = 8.3$  Hz, 1H), 7.67 (t,  $J = 7.5$  Hz, 1H), 7.57 (t,  $J = 7.9$  Hz, 1H), 7.56 (d,  $J = 6.2$  Hz, 1H), 7.31 (m, 1H), 6.04 (t,  $J = 3.4$  Hz, 1H), 5.54 (m, 1H), 4.90 (s, 2H), 1.46 (s, 9H);  $^{13}\text{C}$  NMR (125 MHz,  $\text{CDCl}_3$ ):  $\delta$  159.0, 149.7, 141.9, 136.2, 131.9, 130.0, 127.23, 127.20, 127.17, 125.5, 121.2, 119.7, 113.1, 110.1, 83.4, 35.5, 27.9(3C); HRMS (ESI)  $m/z$  calculated for  $\text{C}_{19}\text{H}_{21}\text{N}_2\text{O}_2$   $[(\text{M}+\text{H})^+]$  309.1598, found 309.1598. IR (film) 3053, 2979, 1734, 1625, 1563, 1410, 1317, 1253, 1156, 1062  $\text{cm}^{-1}$ .

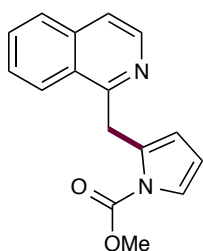

**53**

**Methyl 2-(isoquinolin-1-ylmethyl)-1H-pyrrole-1-carboxylate (53):** Following the procedure for compound **50**,  $\text{Ir}(\text{ppy})_2(\text{dtbbpy})\text{PF}_6$  (2.3 mg, 2.5  $\mu$ mol, 0.01 equiv.), TsOH (95.1 mg, 0.50 mmol, 2.0 equiv.), 1-(hydroxymethyl)isoquinoline (40.1 mg, 0.25 mmol, 1.0 equiv.), methyl 1-pyrrolecarboxylate (28  $\mu$ L, 0.25 mmol, 1.0 equiv.) and 1.0 mL of DMSO were used. After 20 hours, the reaction mixture was diluted with 1 M NaOH aqueous solution (1 mL) and  $\text{CH}_2\text{Cl}_2$  (20 mL), washed with brine ( $3 \times 10$  mL), dried over

Na<sub>2</sub>SO<sub>4</sub>, and concentrated *in vacuo*. Purification of the crude product by flash chromatography on silica gel (20% ethyl acetate/hexanes) to provide the title compound as a colorless oil (16.7 mg, 25% yield). <sup>1</sup>H NMR (500 MHz, CDCl<sub>3</sub>): δ 8.45 (d, *J* = 5.7 Hz, 1H), 8.13 (d, *J* = 8.4 Hz, 1H), 7.83 (d, *J* = 8.1 Hz, 1H), 7.67 (m, 1H), 7.56 (m, 1H), 7.55 (d, *J* = 6.4 Hz, 1H), 7.30 (dd, *J* = 3.4, 1.7 Hz, 1H), 6.08 (t, *J* = 3.3 Hz, 1H), 5.61 (m, 1H), 4.92 (s, 2H), 3.85 (s, 3H); <sup>13</sup>C NMR (125 MHz, CDCl<sub>3</sub>): δ 158.9, 151.5, 142.1, 136.3, 132.8, 130.0, 127.32, 127.26, 127.25, 125.5, 121.0, 119.7, 113.6, 110.1, 53.7, 35.1; HRMS (ESI) *m/z* calculated for C<sub>16</sub>H<sub>15</sub>N<sub>2</sub>O<sub>2</sub> [(M+H)<sup>+</sup>] 267.1128, found 267.1127. IR (film) 3053, 2955, 1741, 1624, 1562, 1440, 1317, 1228, 1121, 1065 cm<sup>-1</sup>.

# VI. NMR Spectra

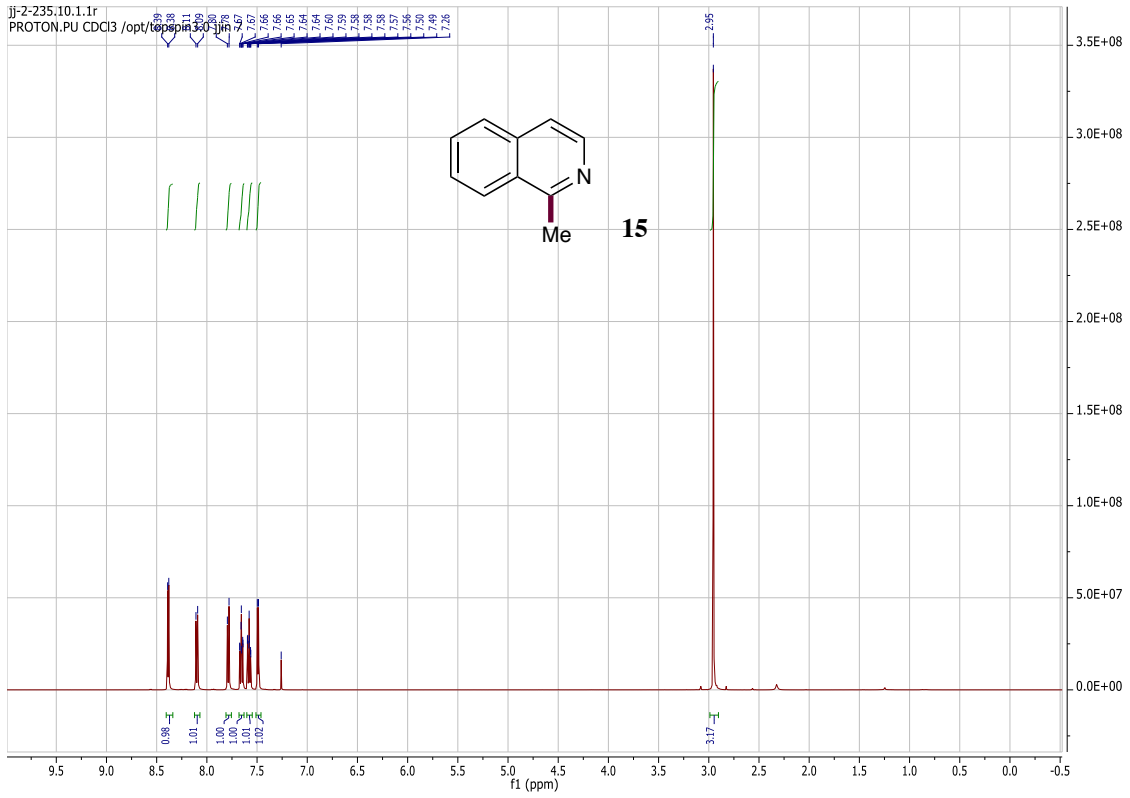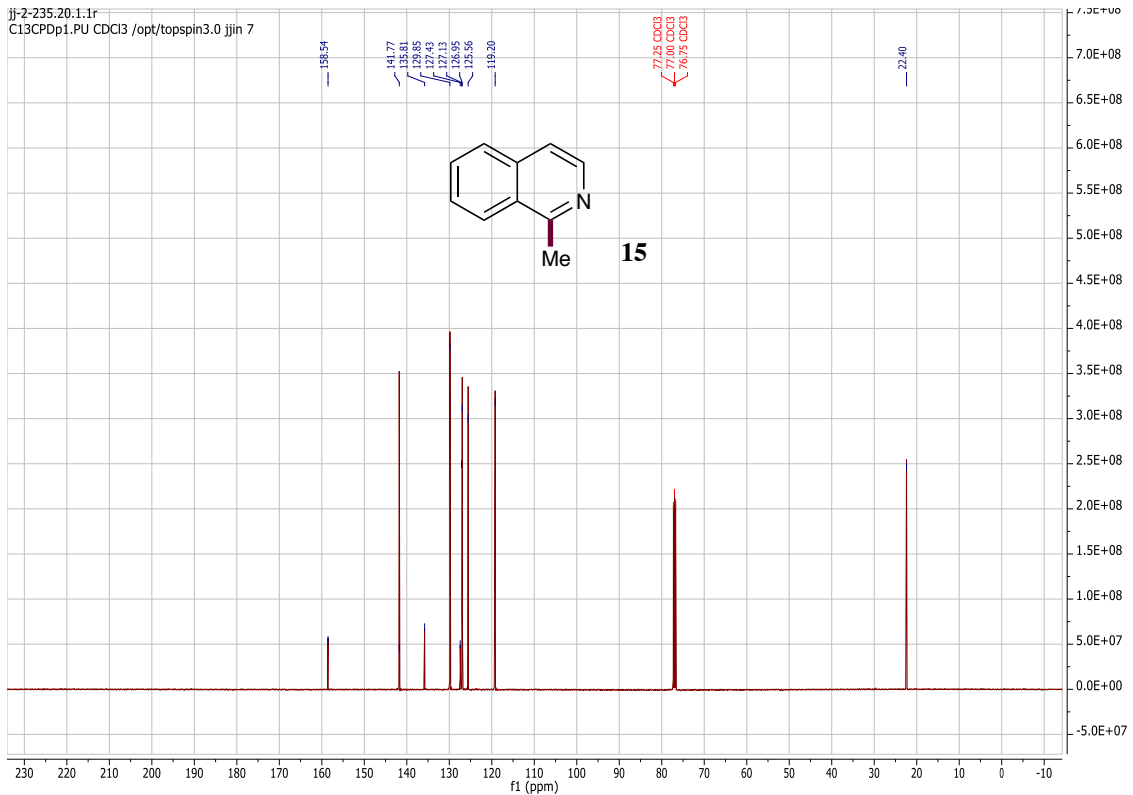

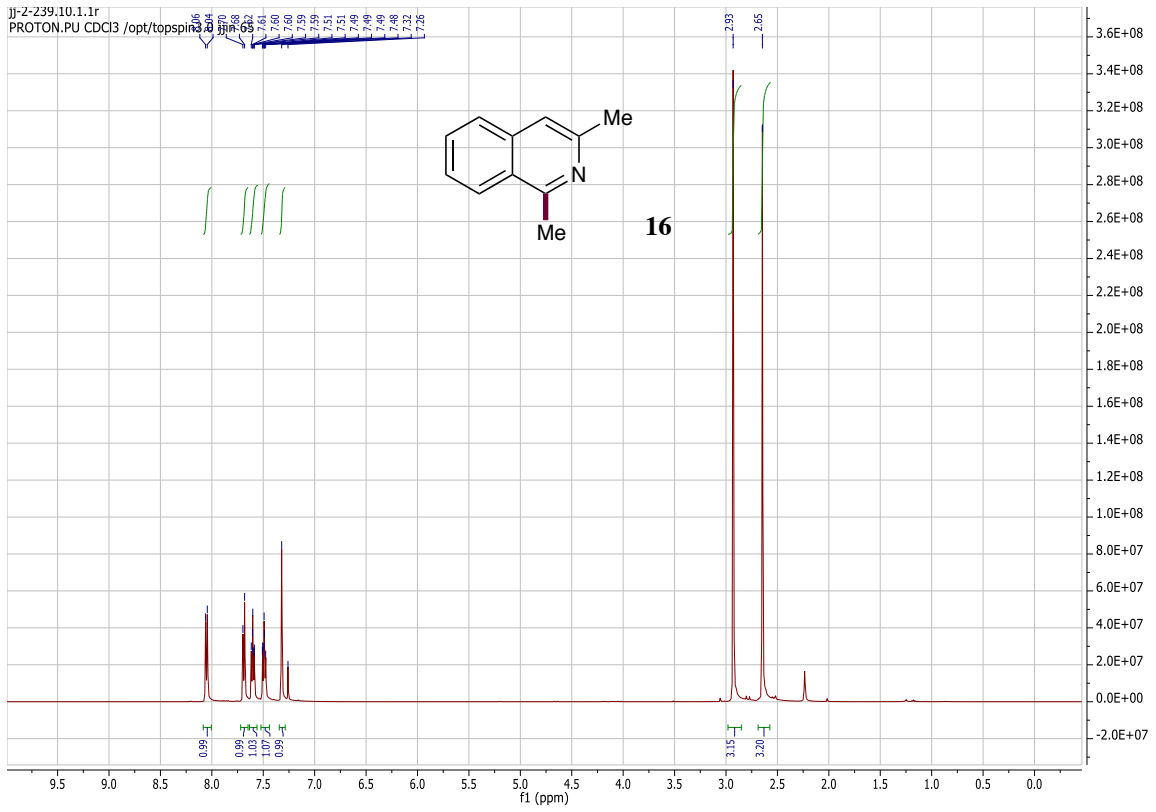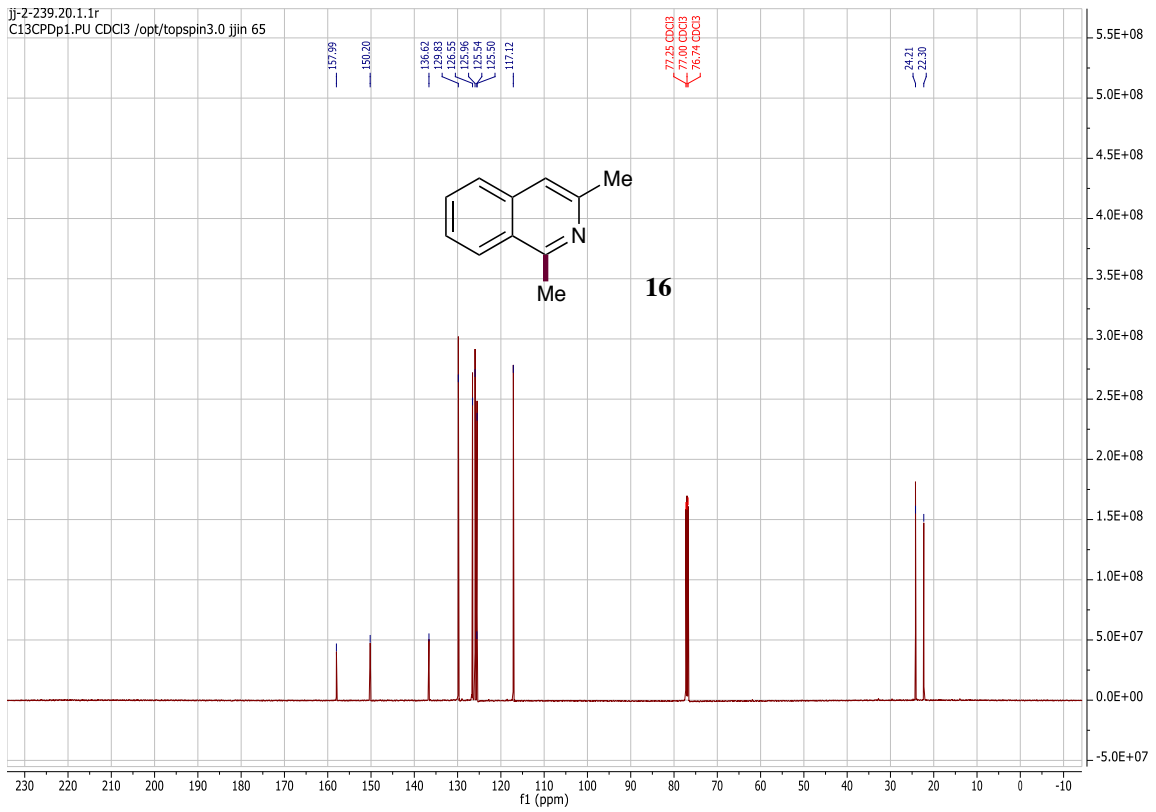



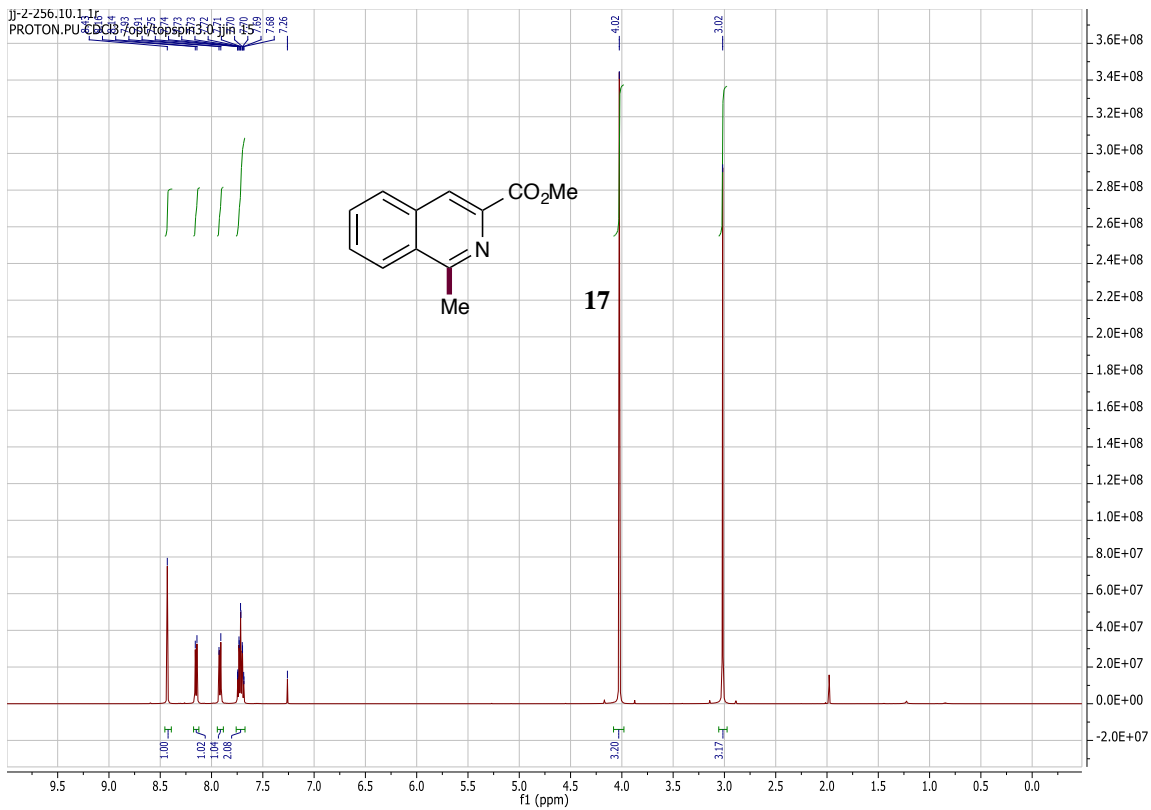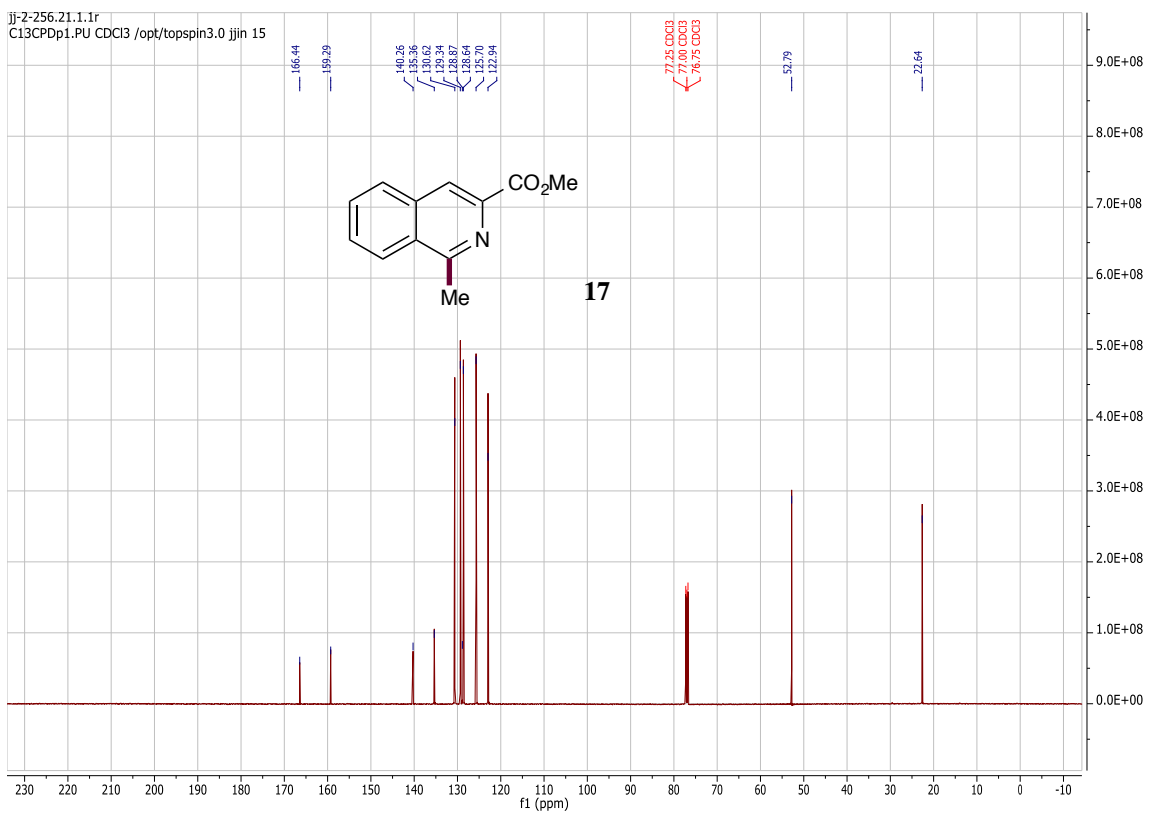

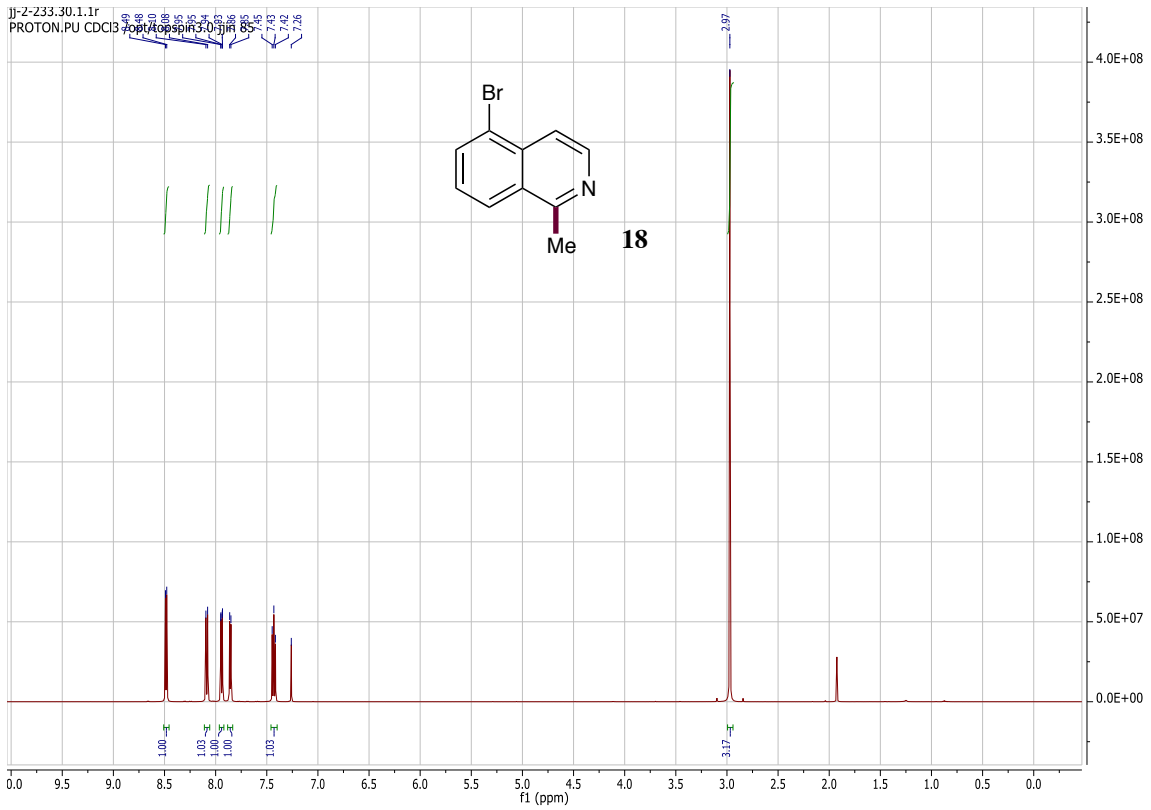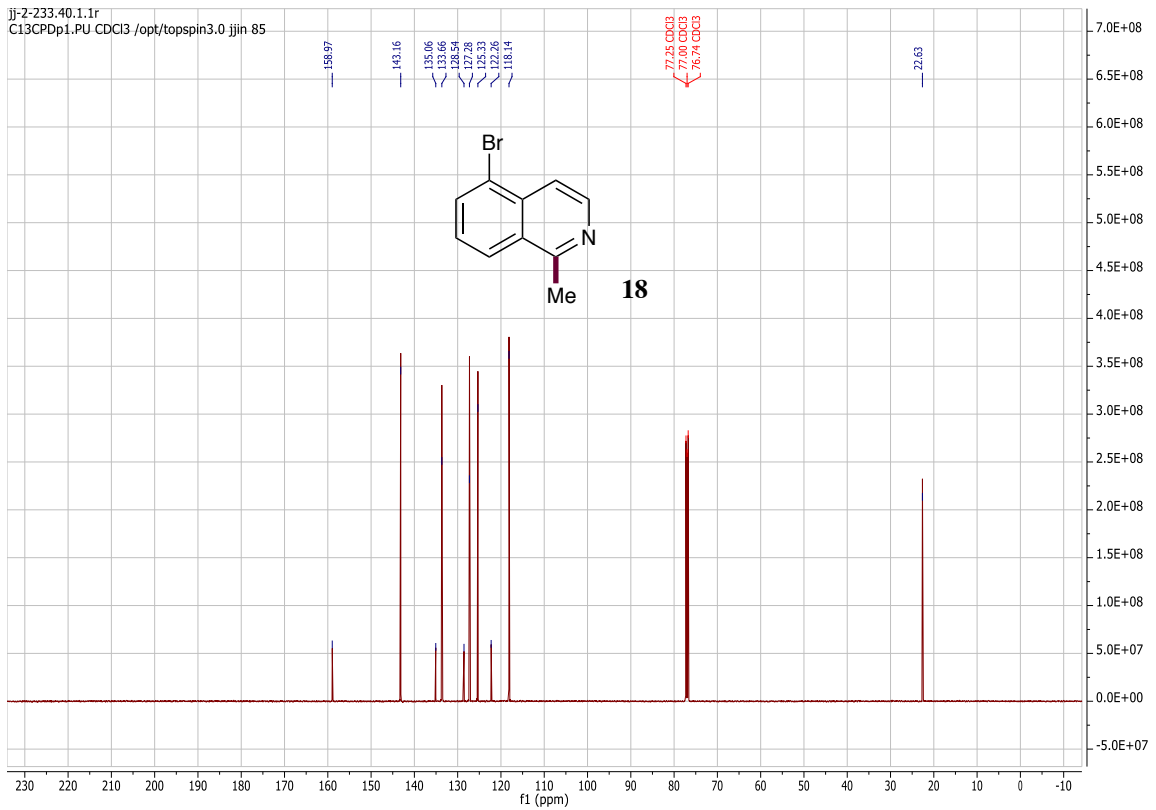

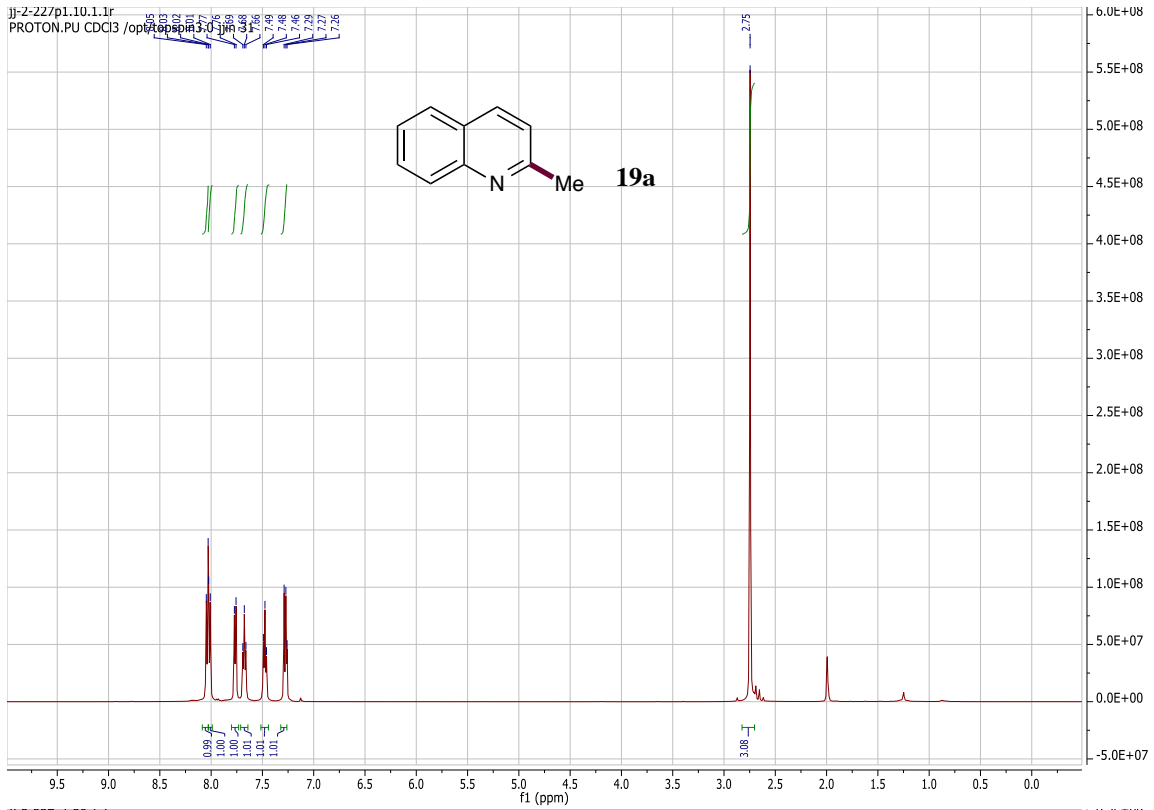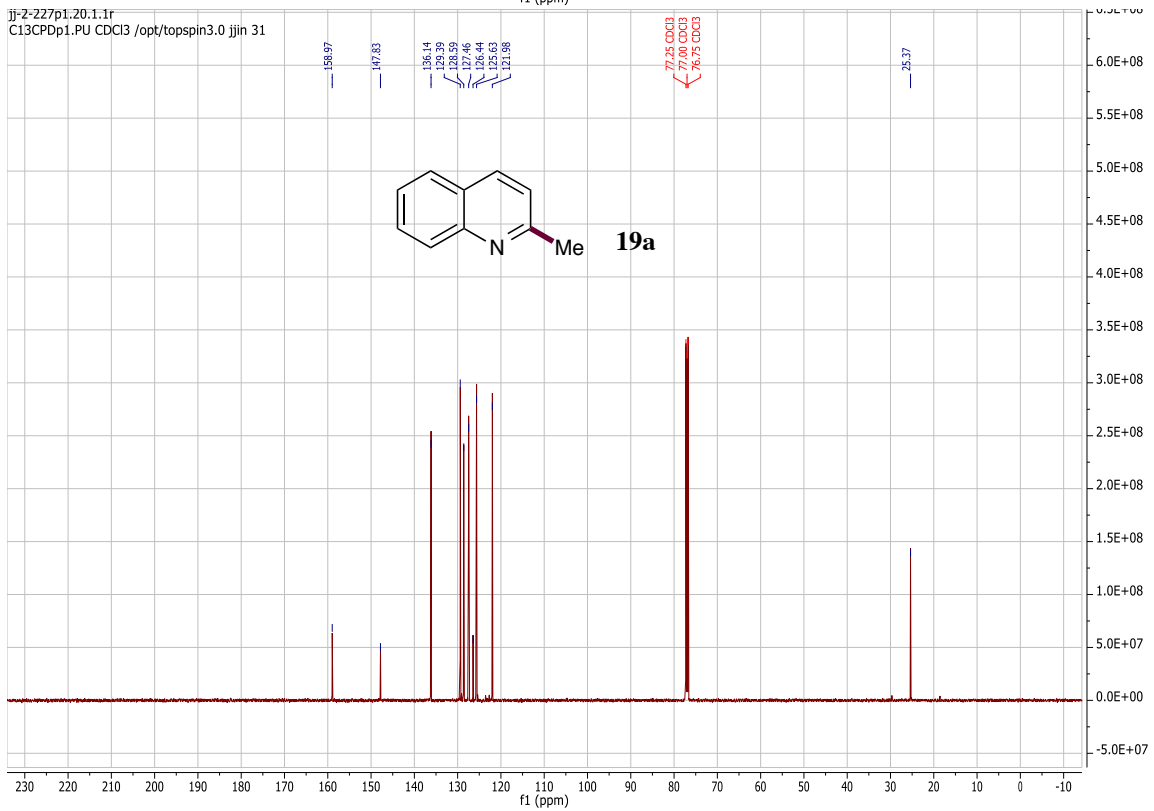

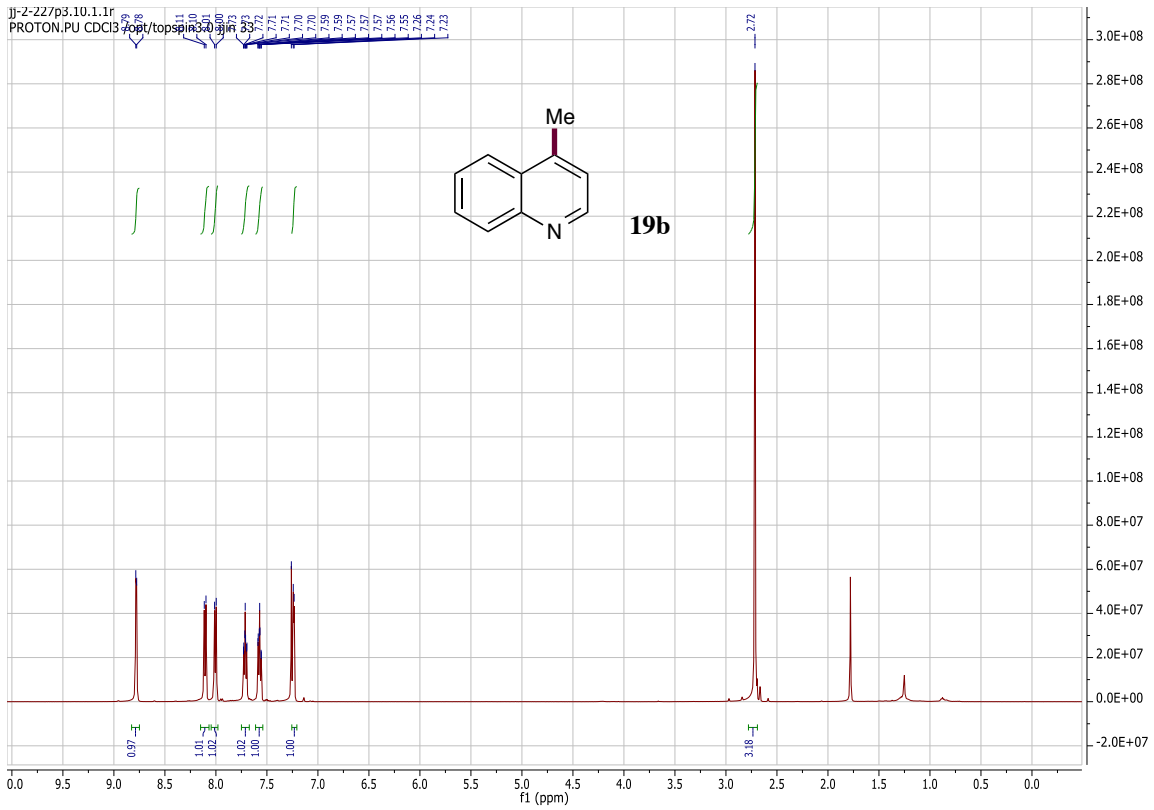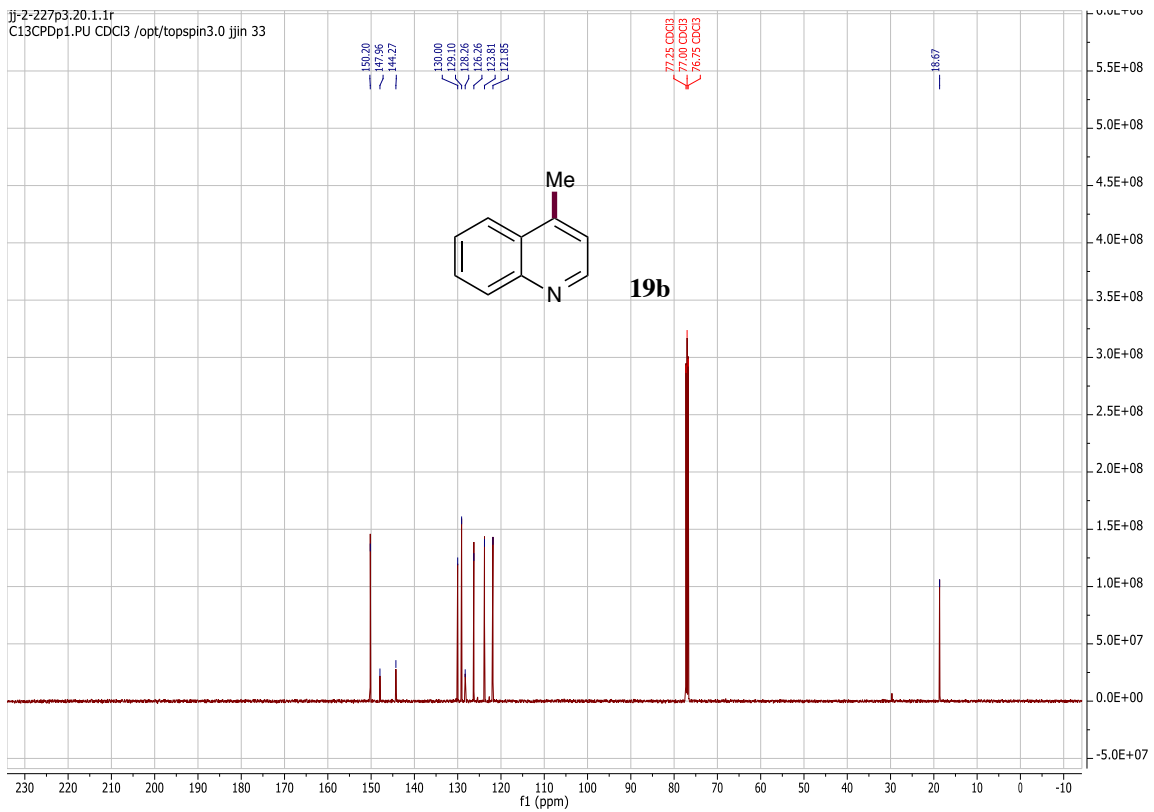

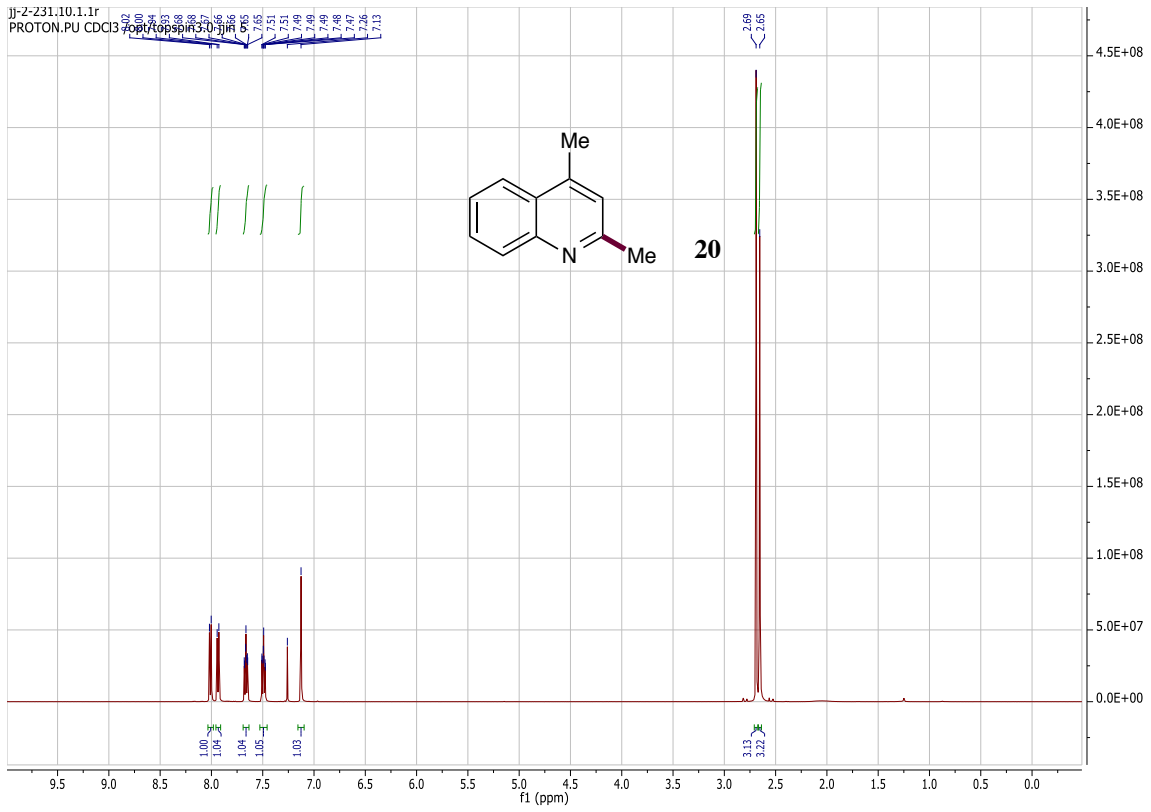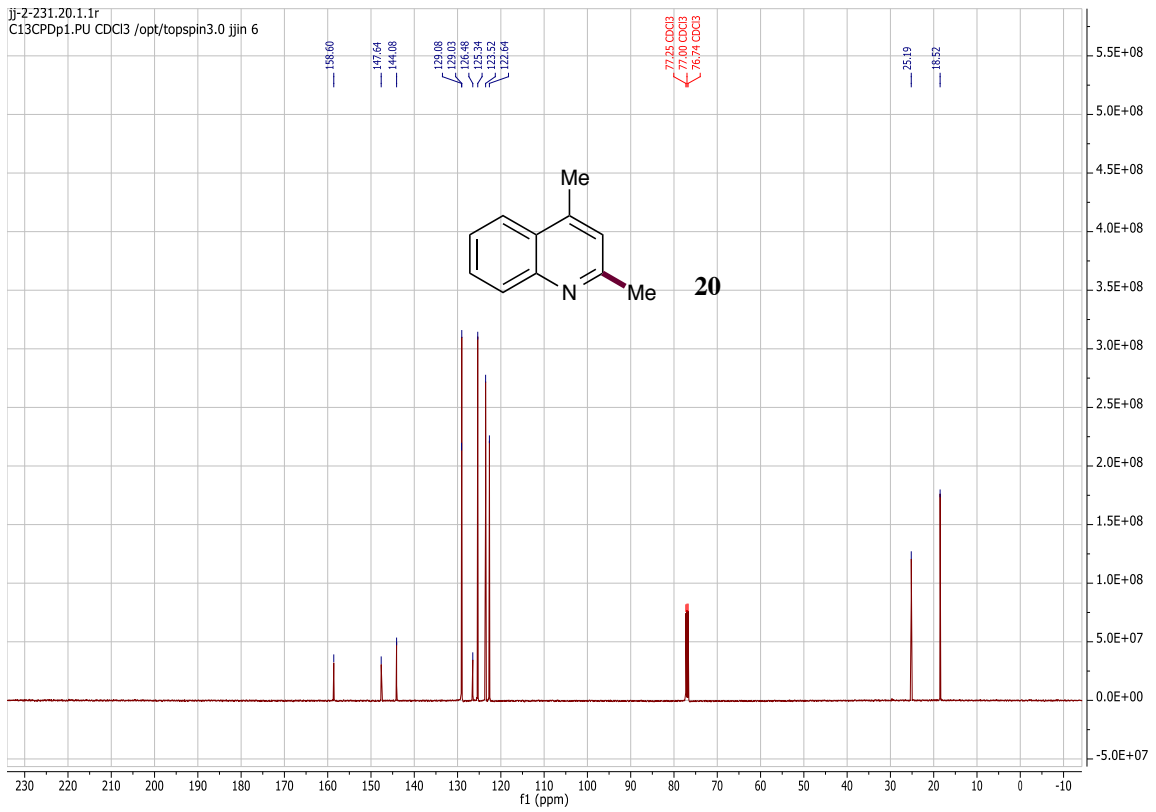

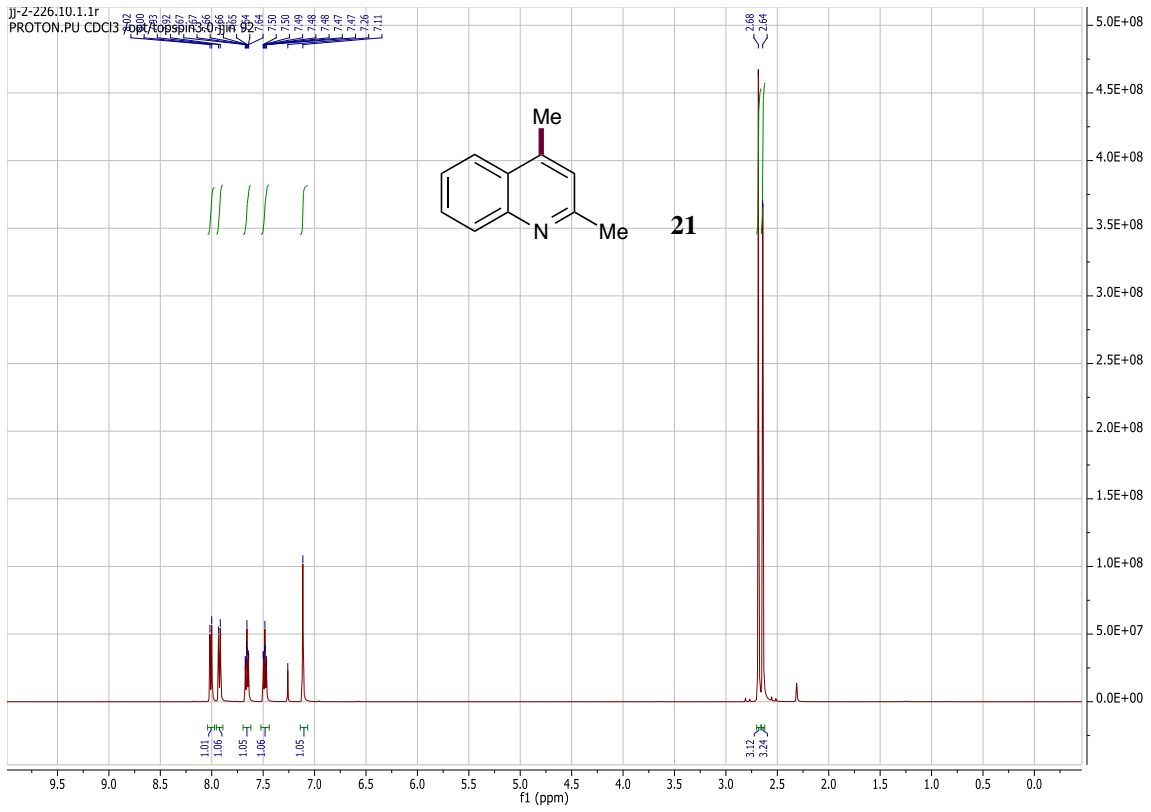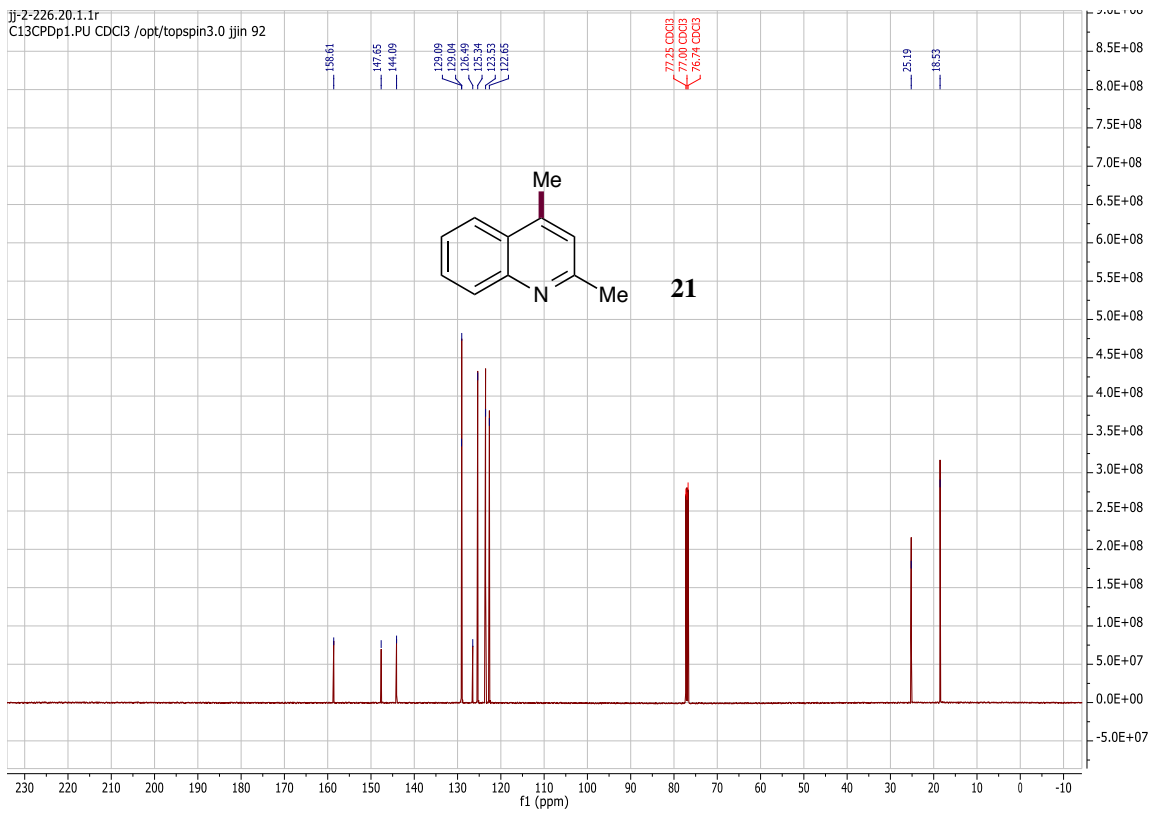

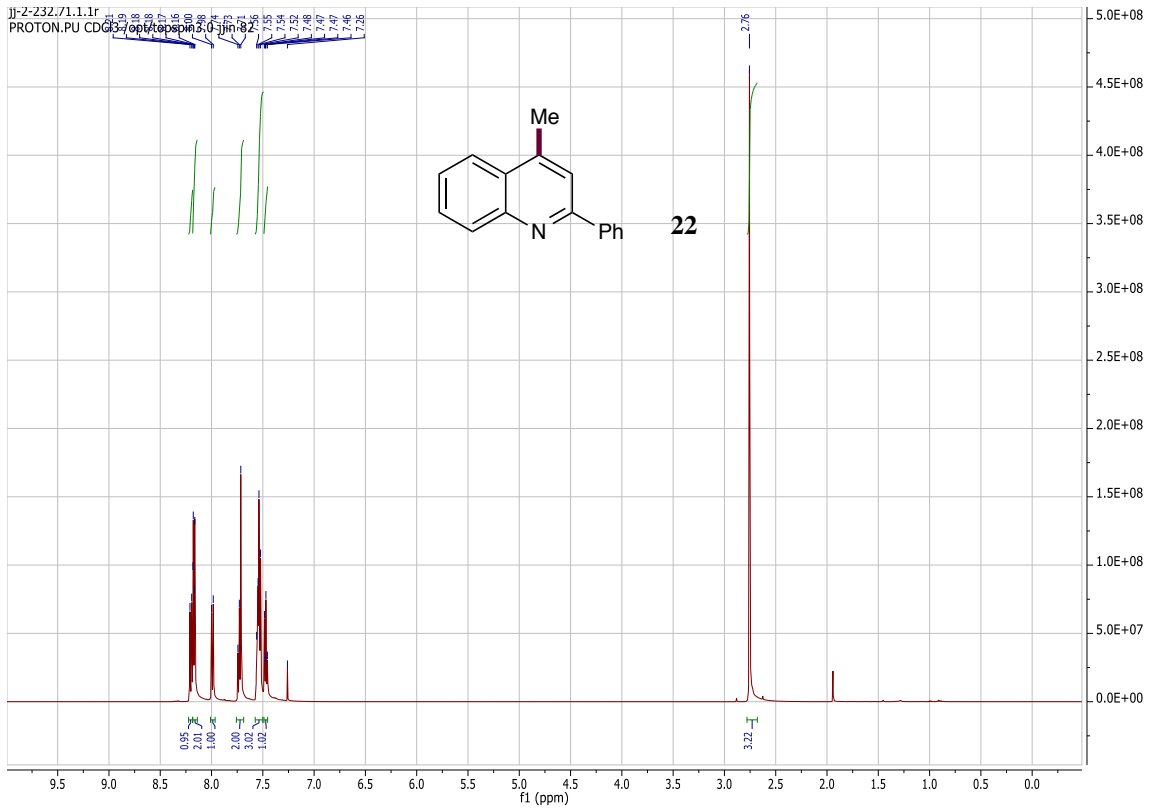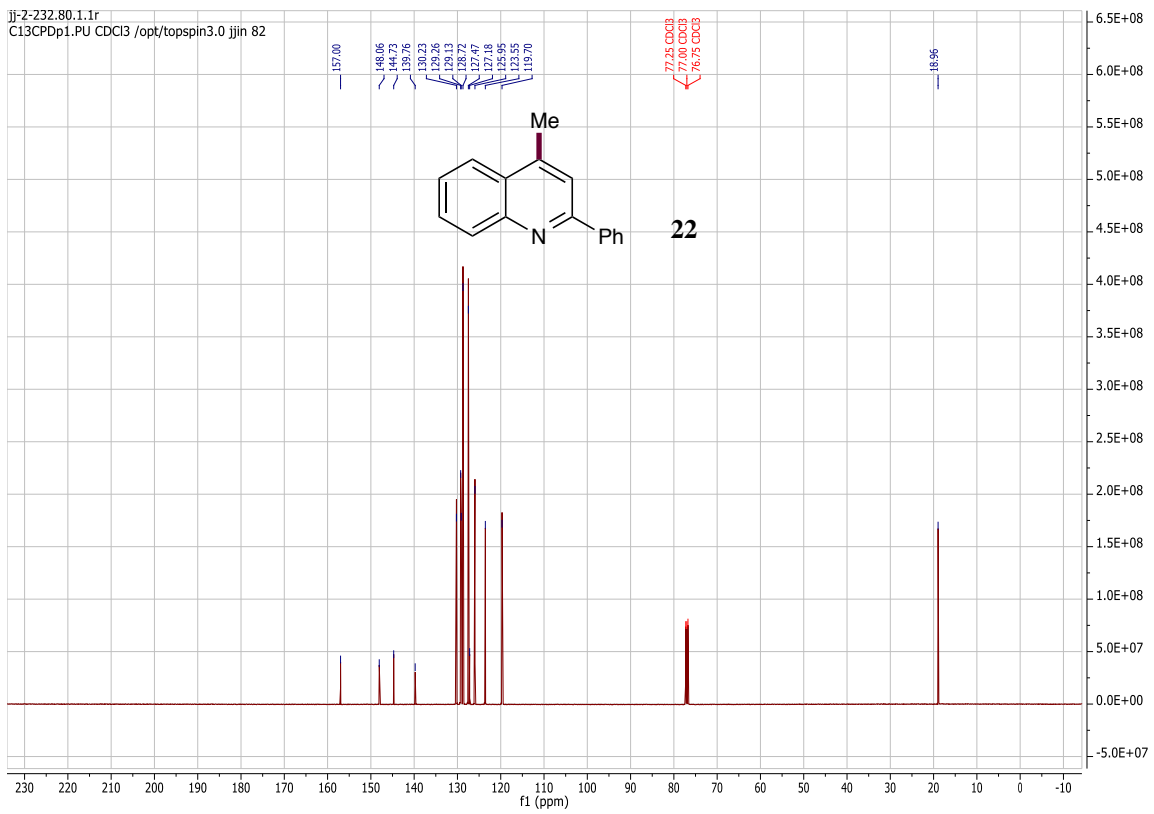

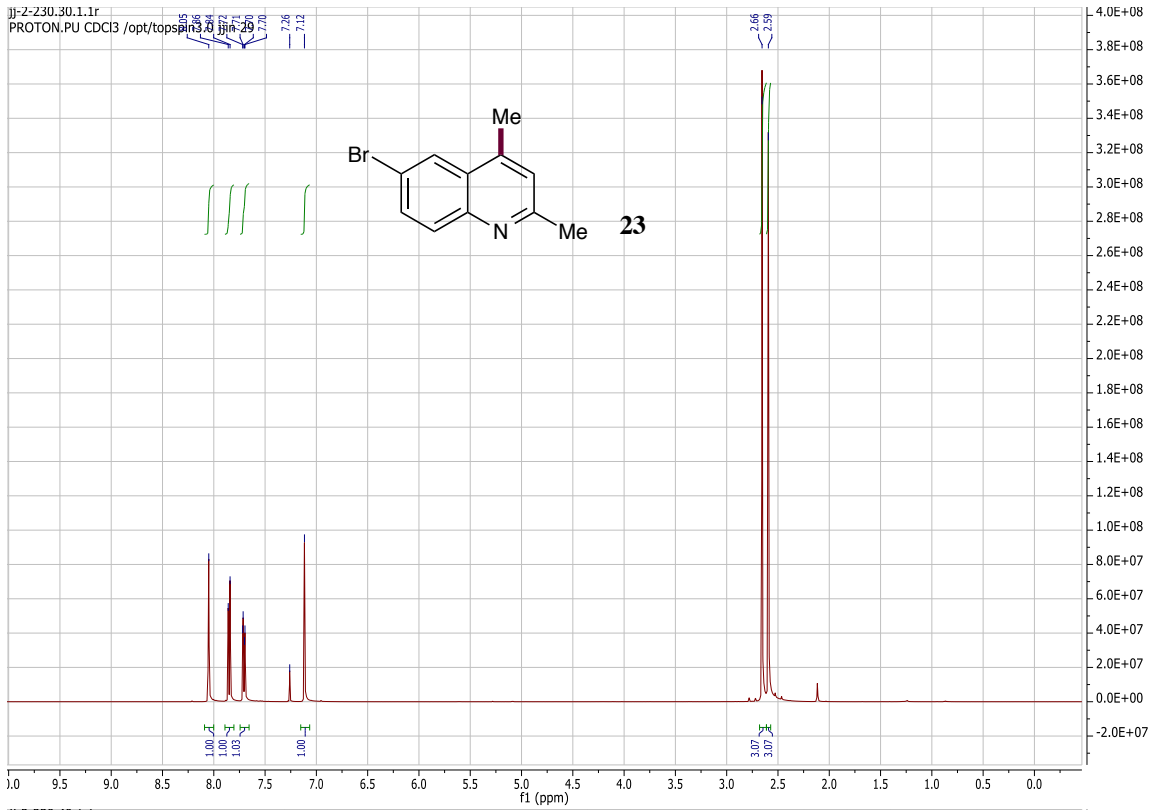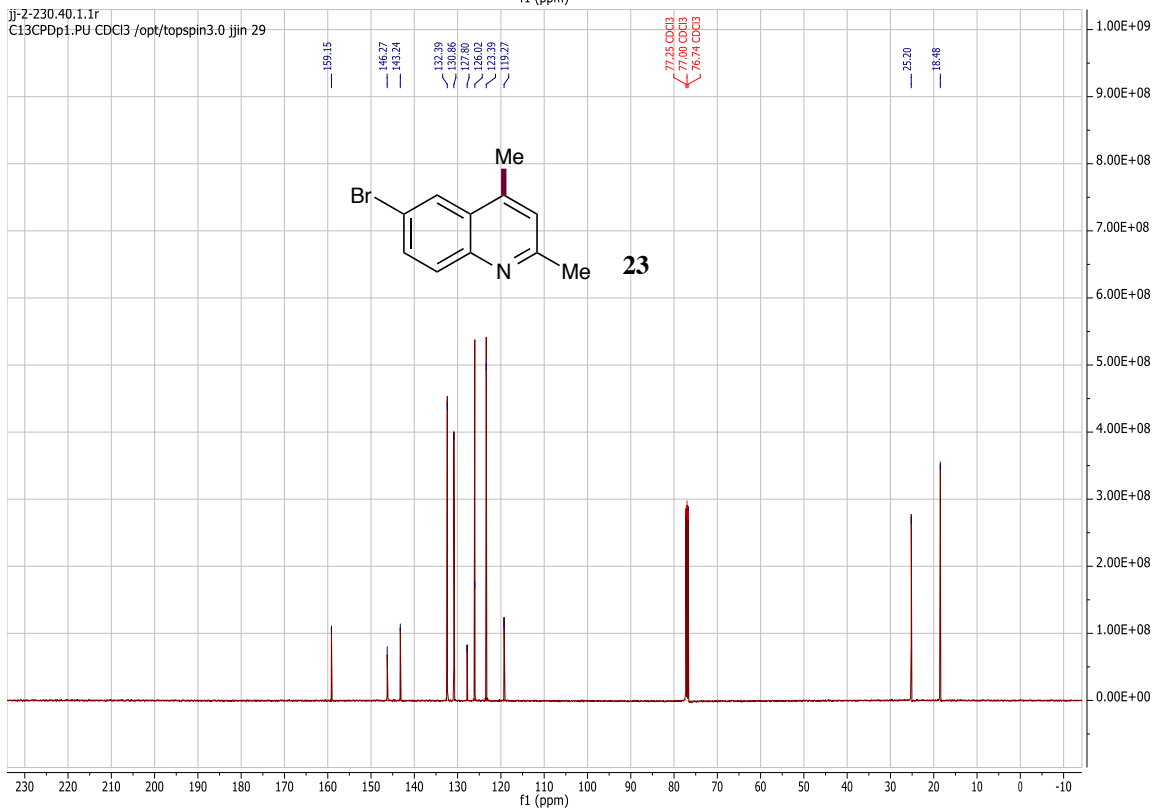



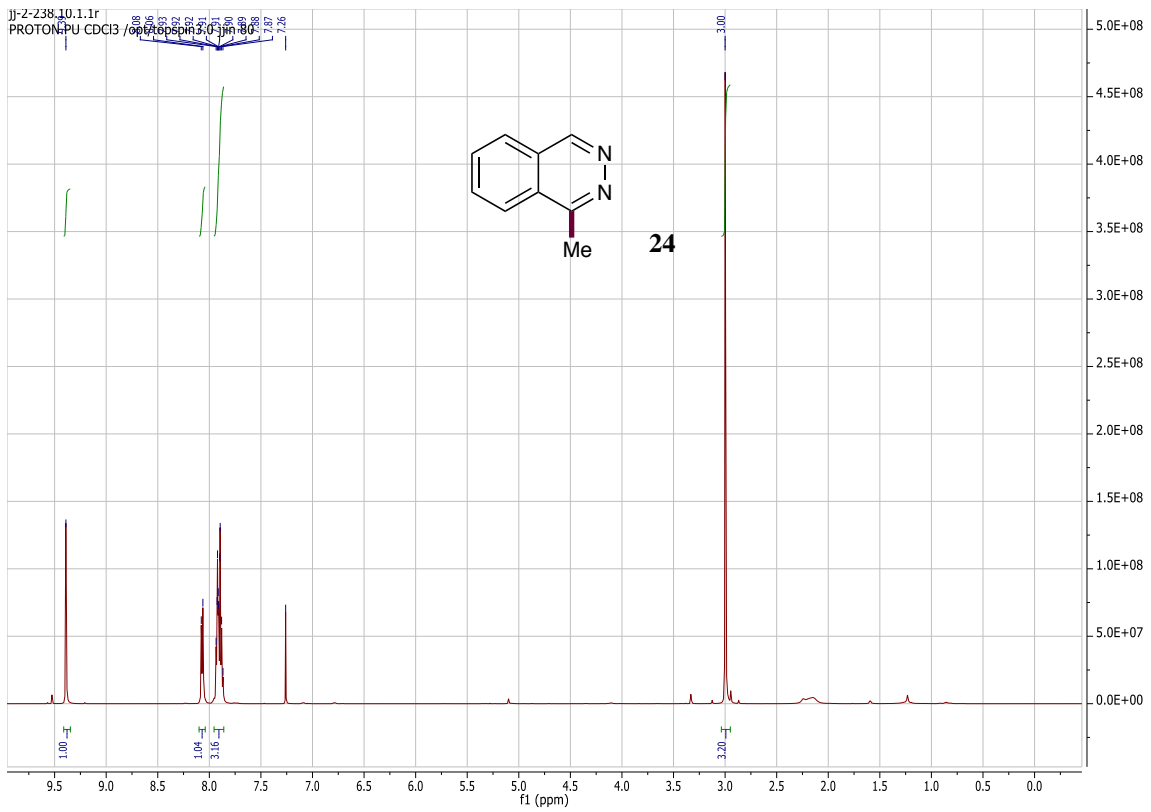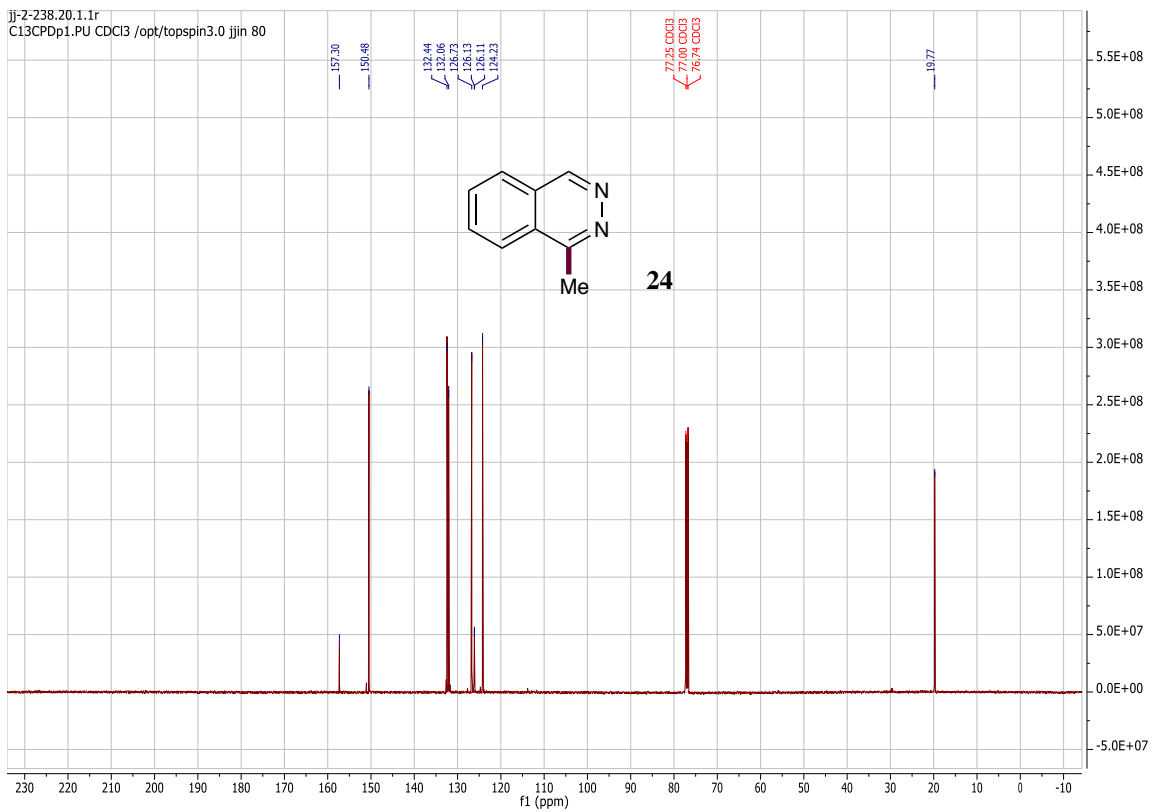

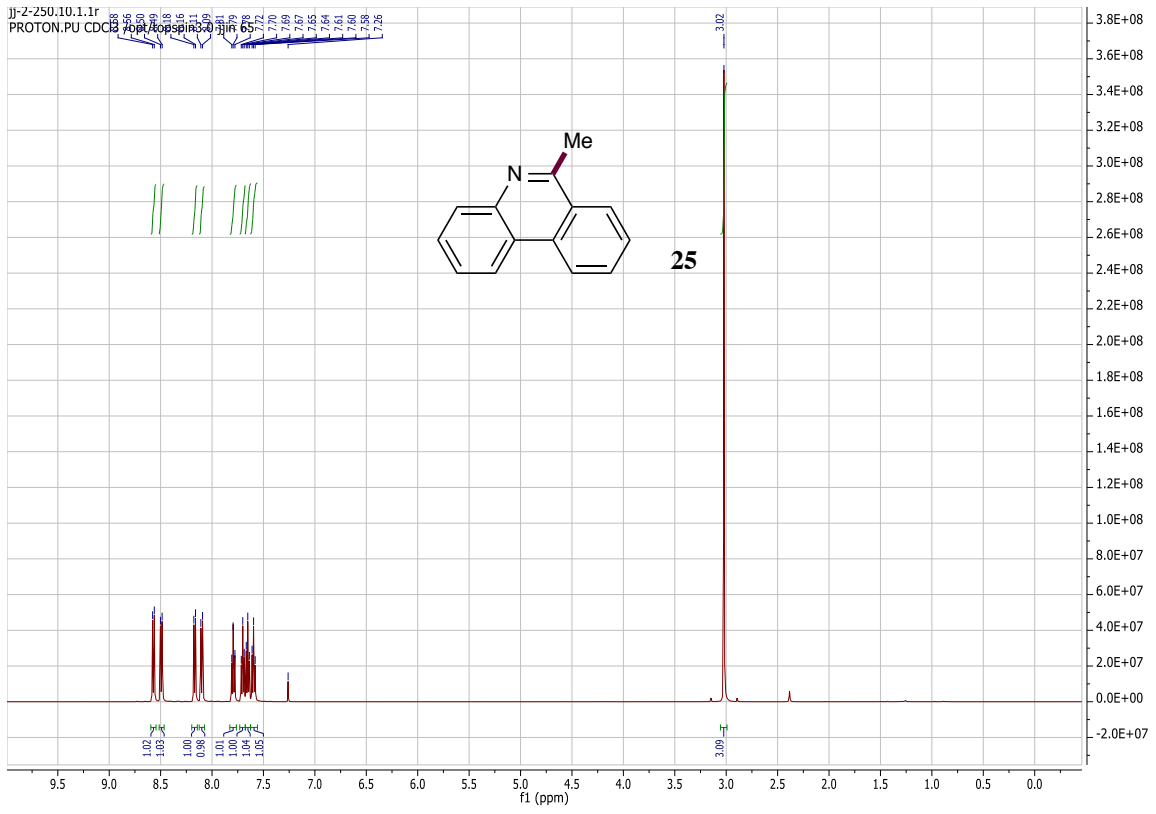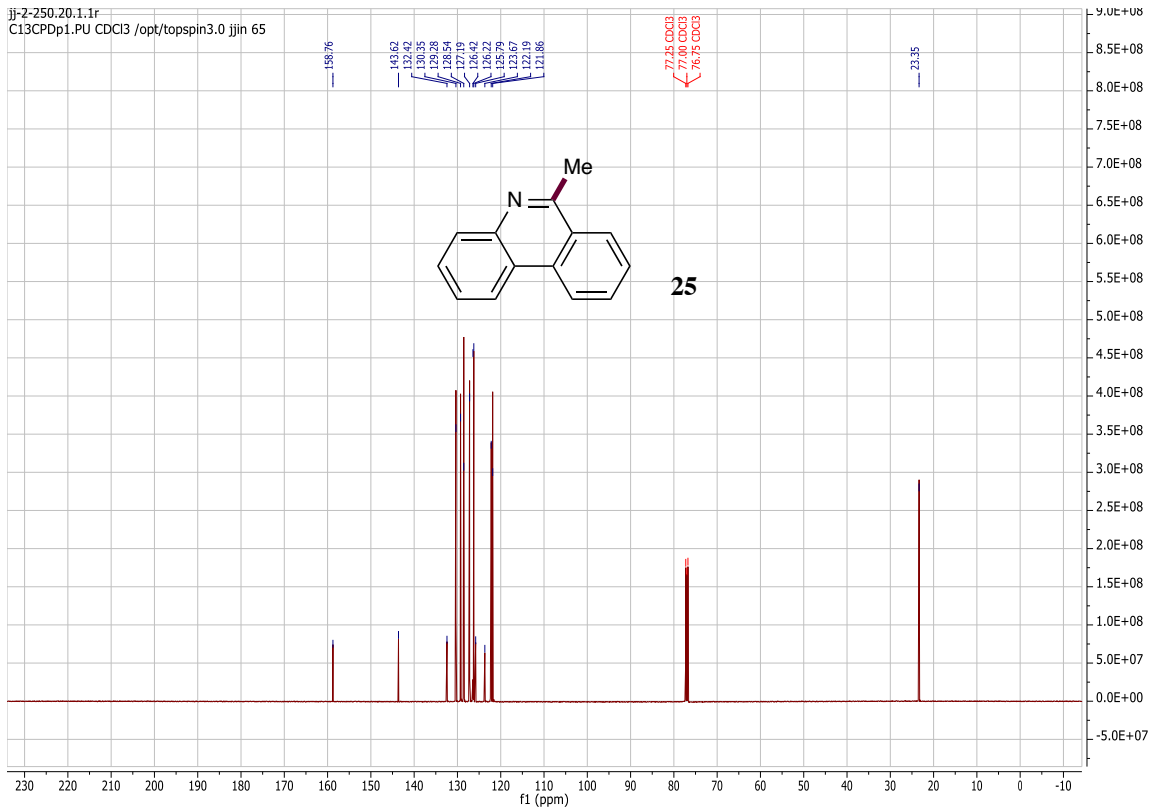

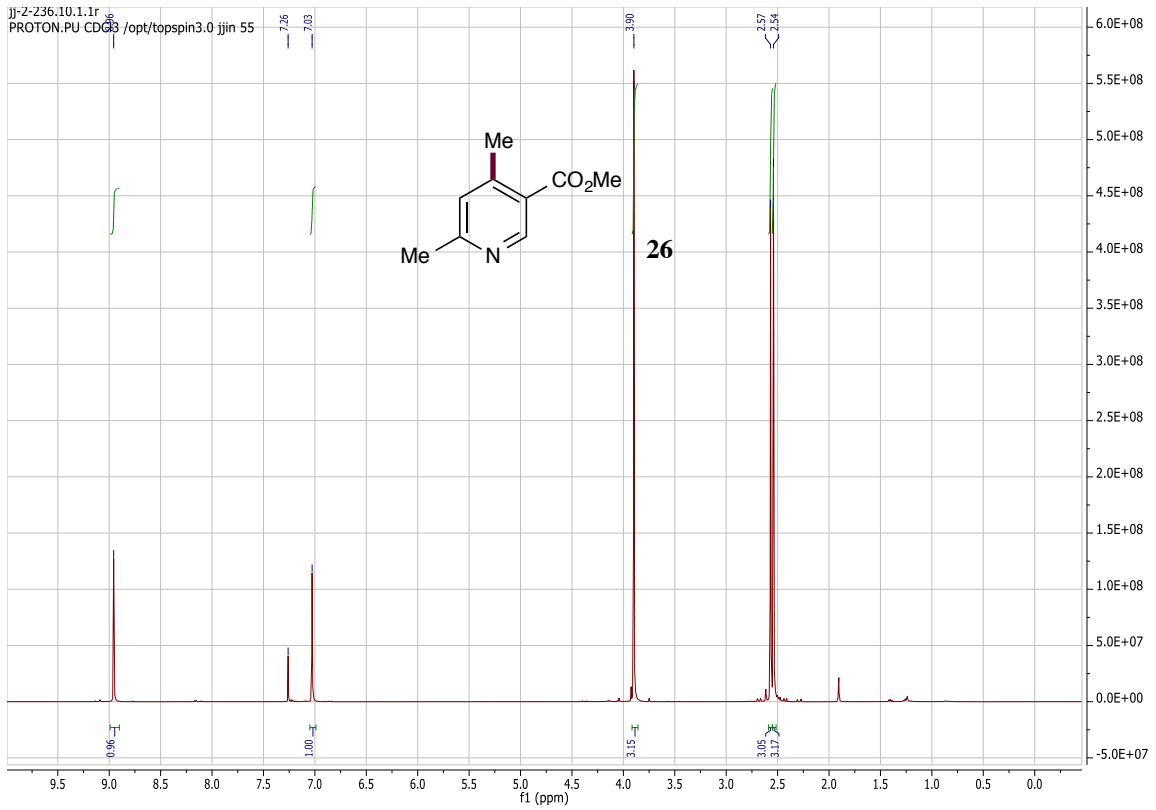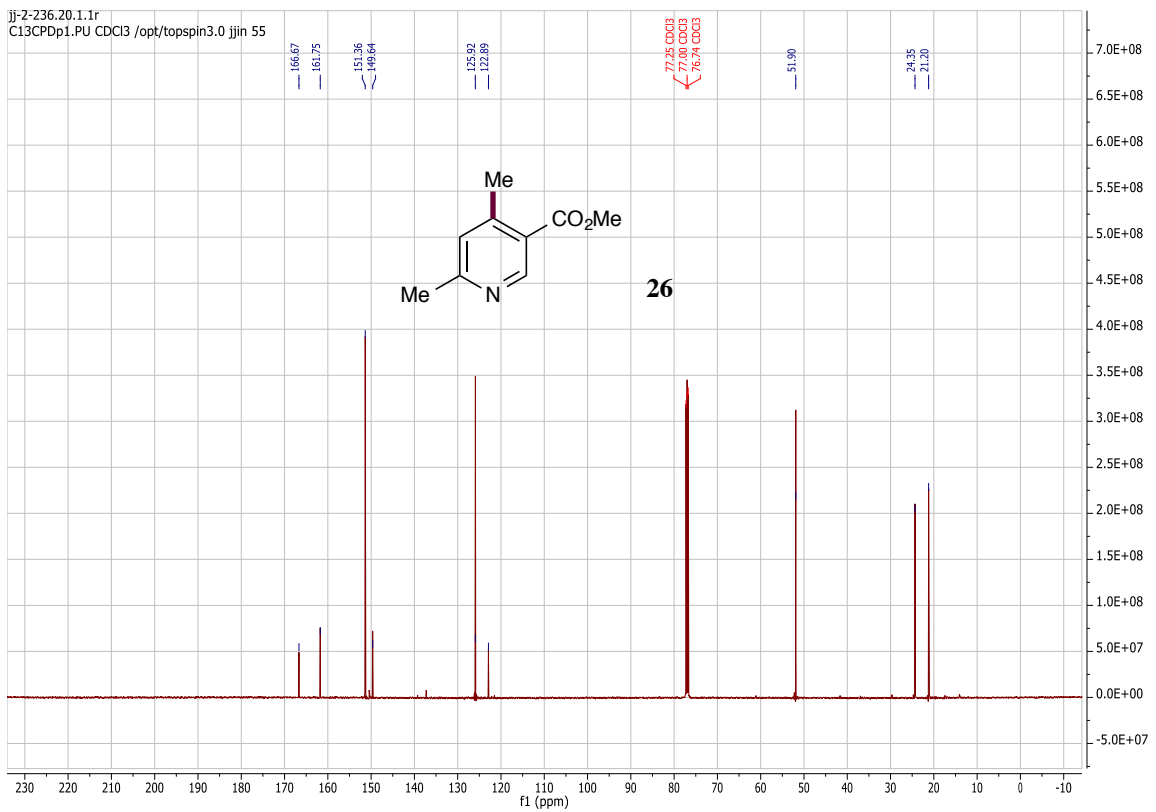

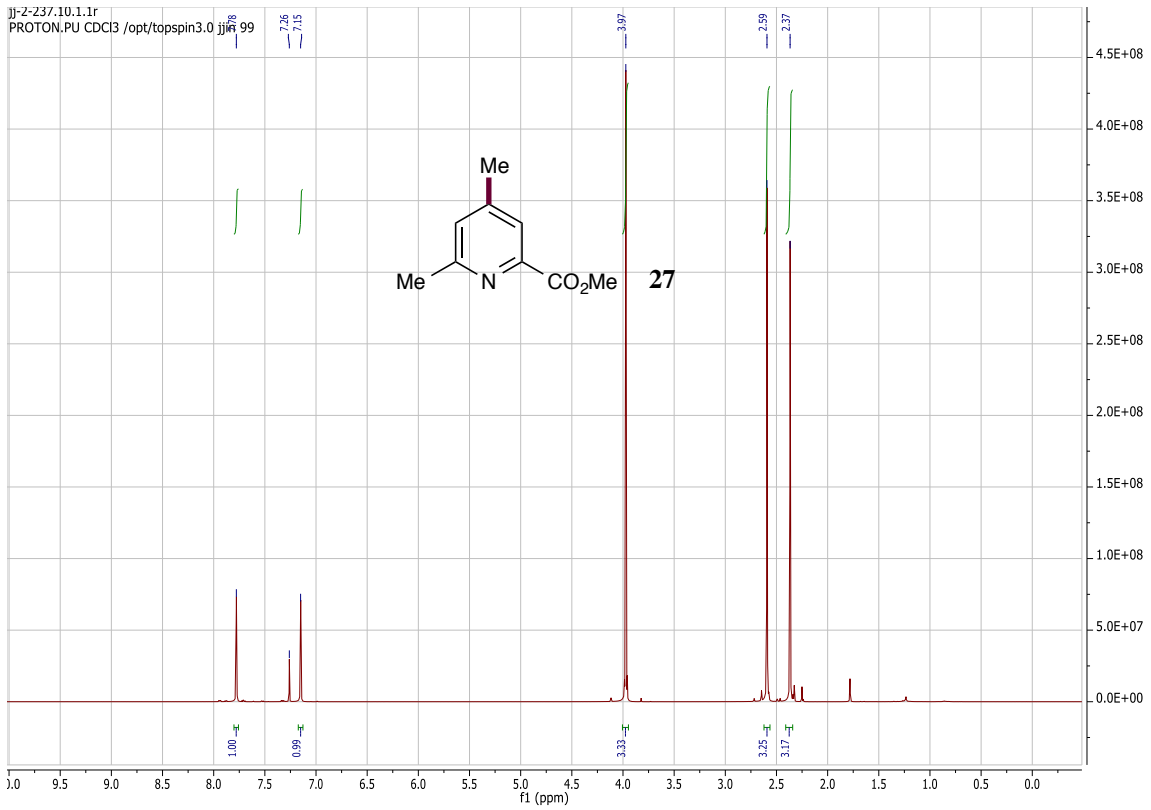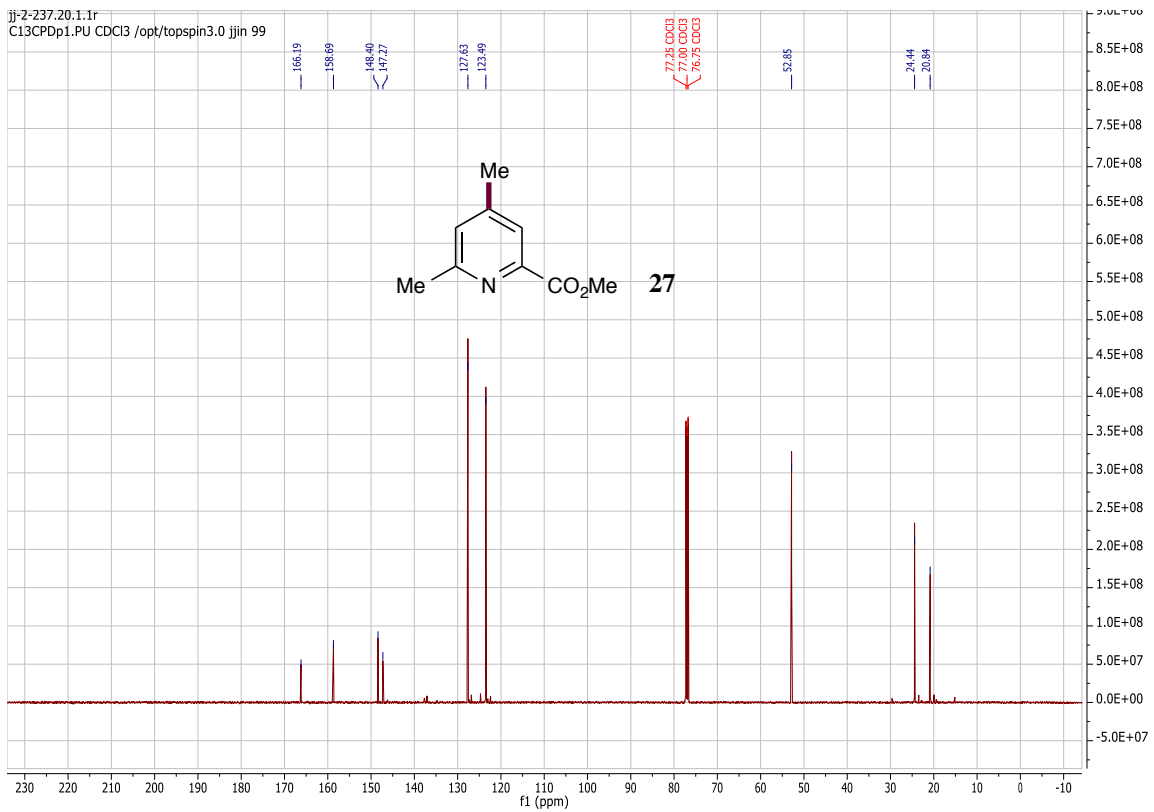

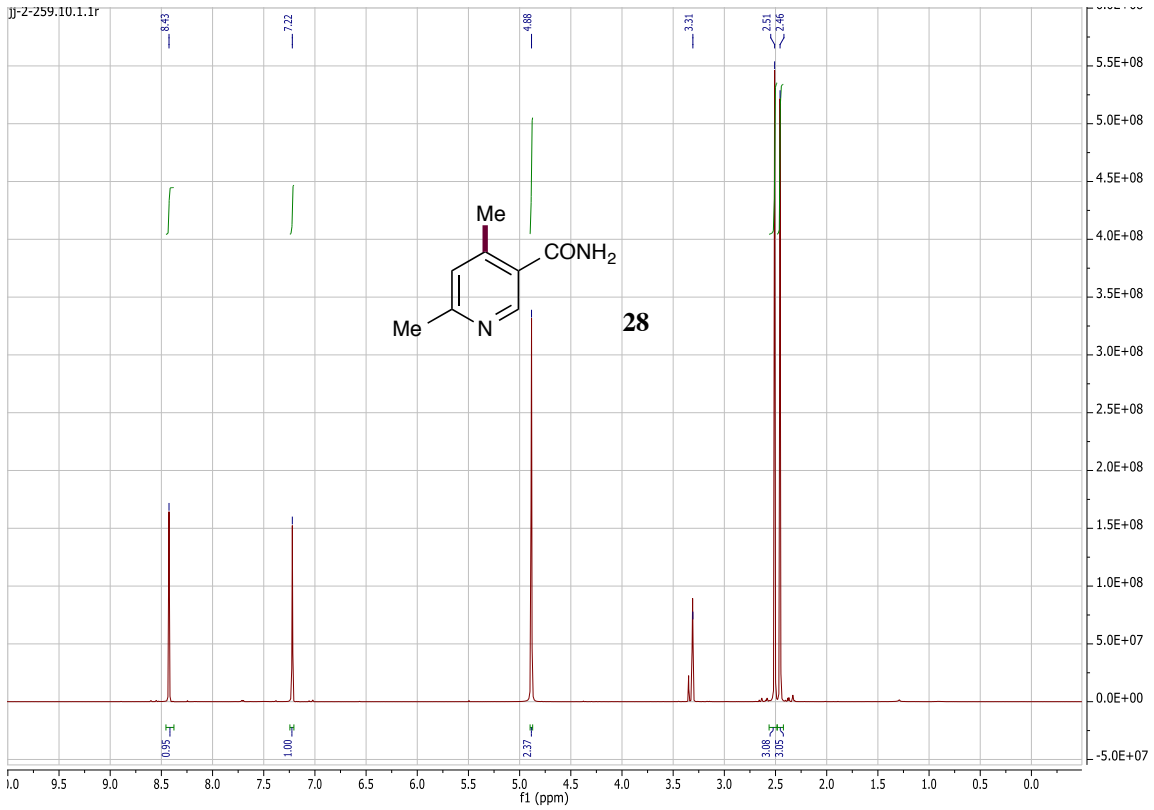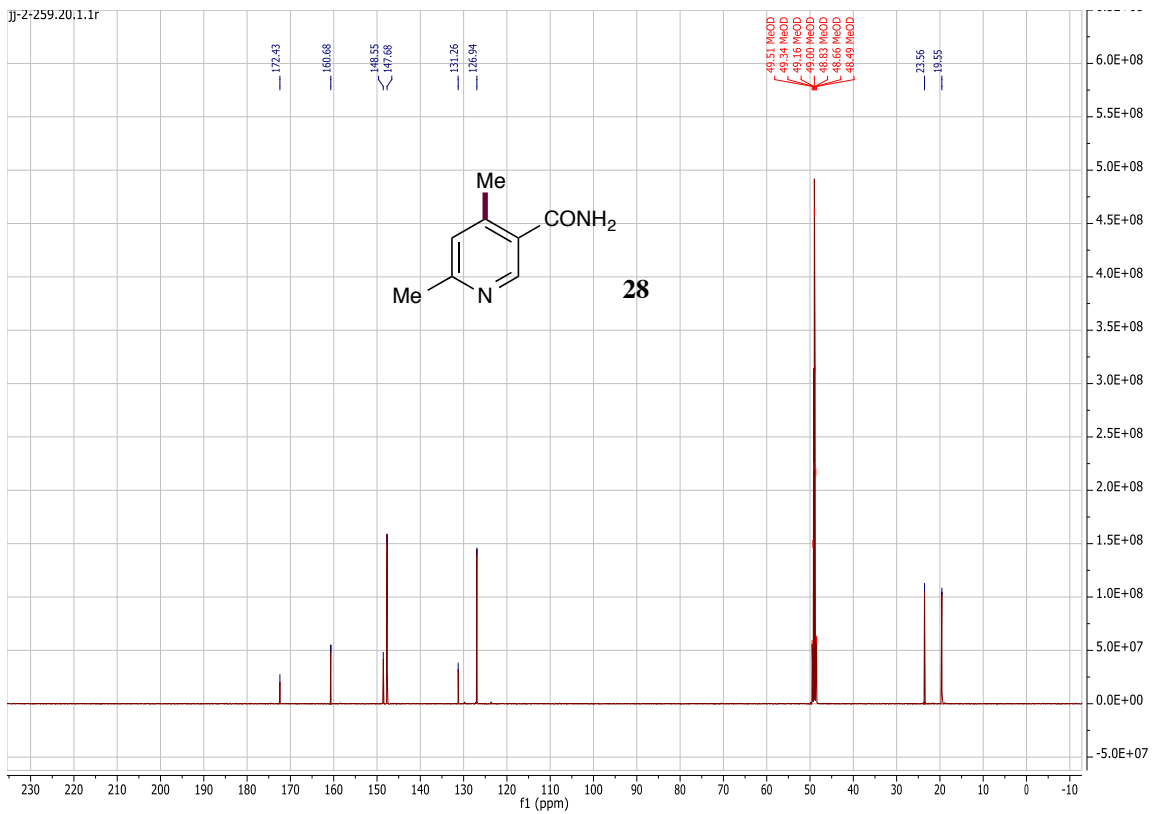

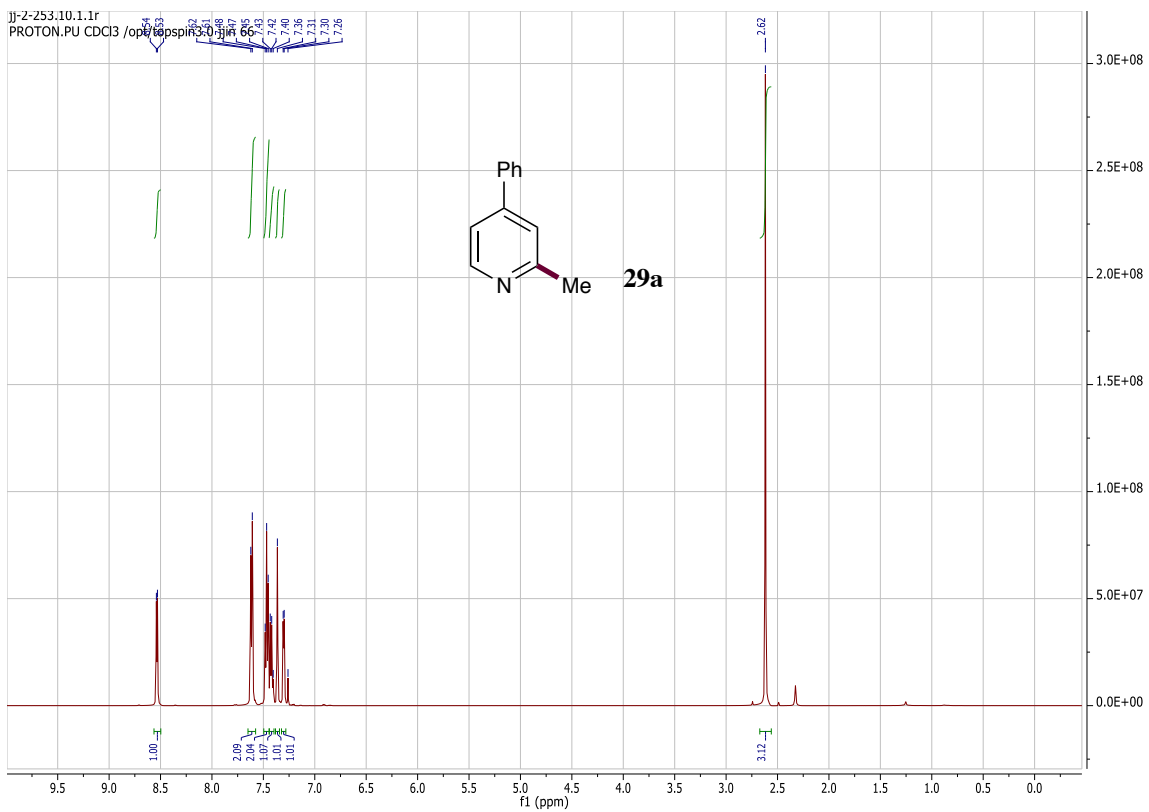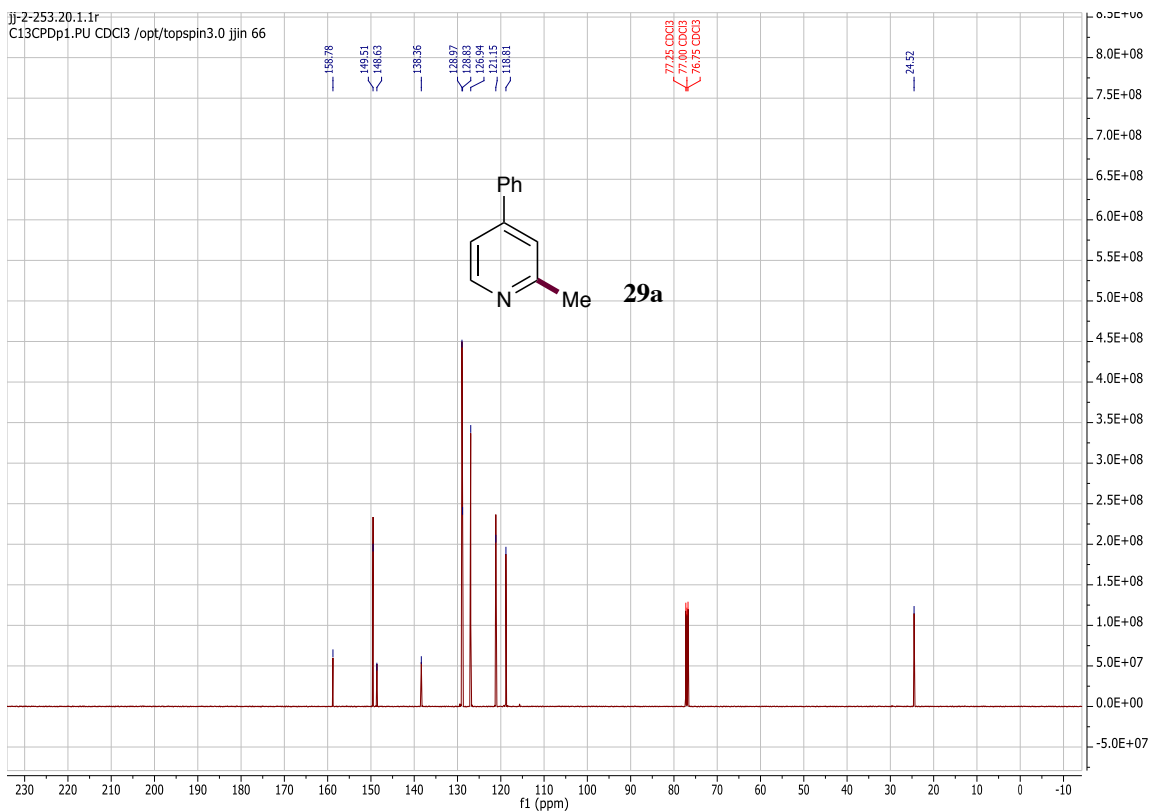

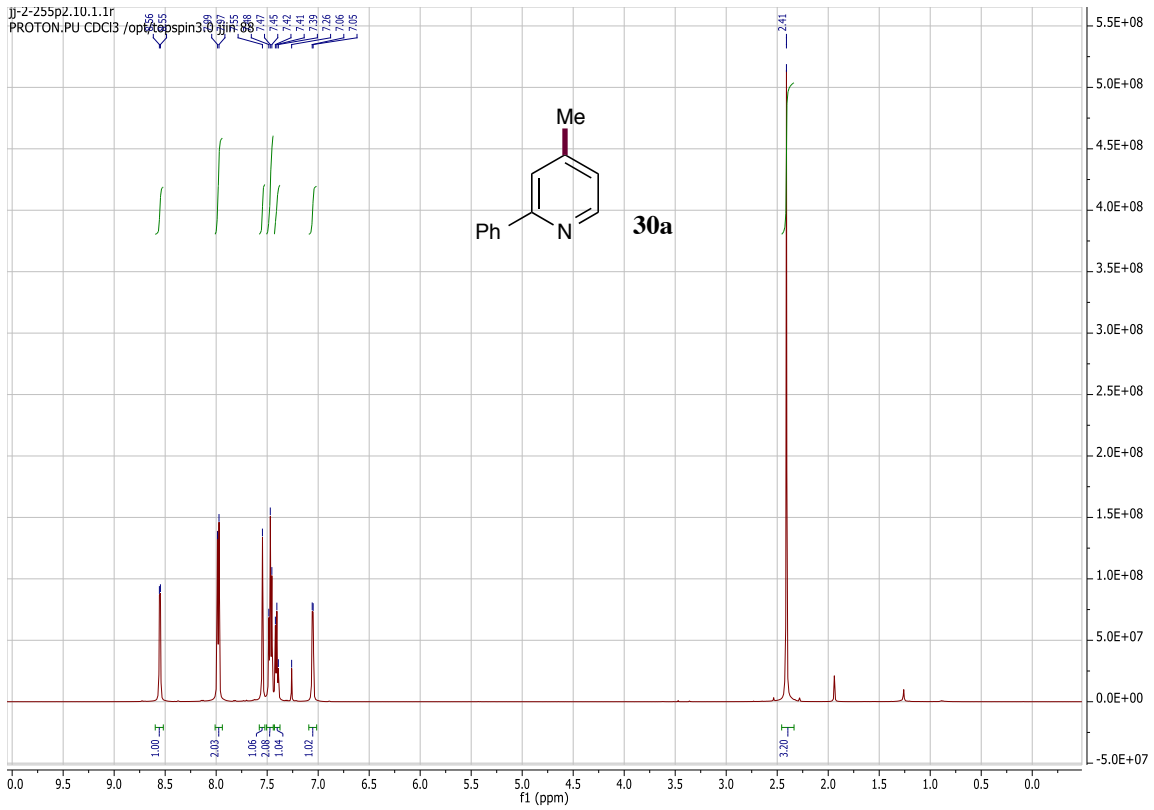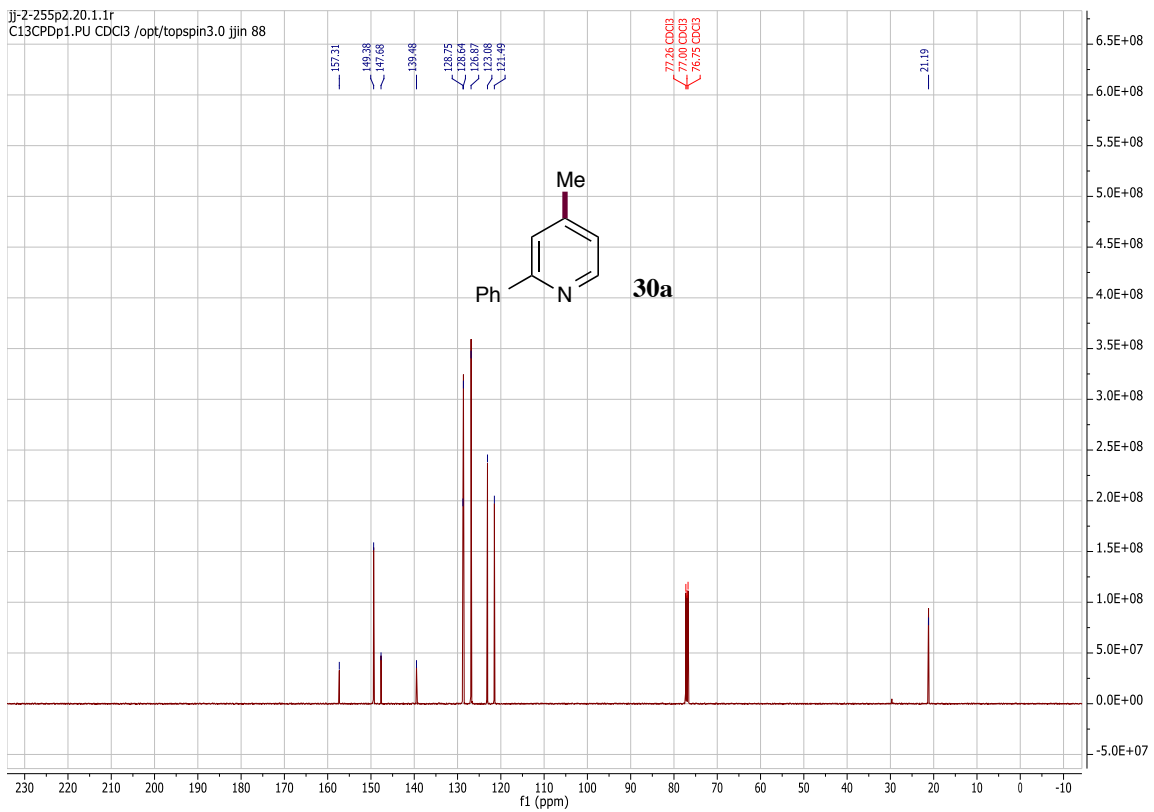

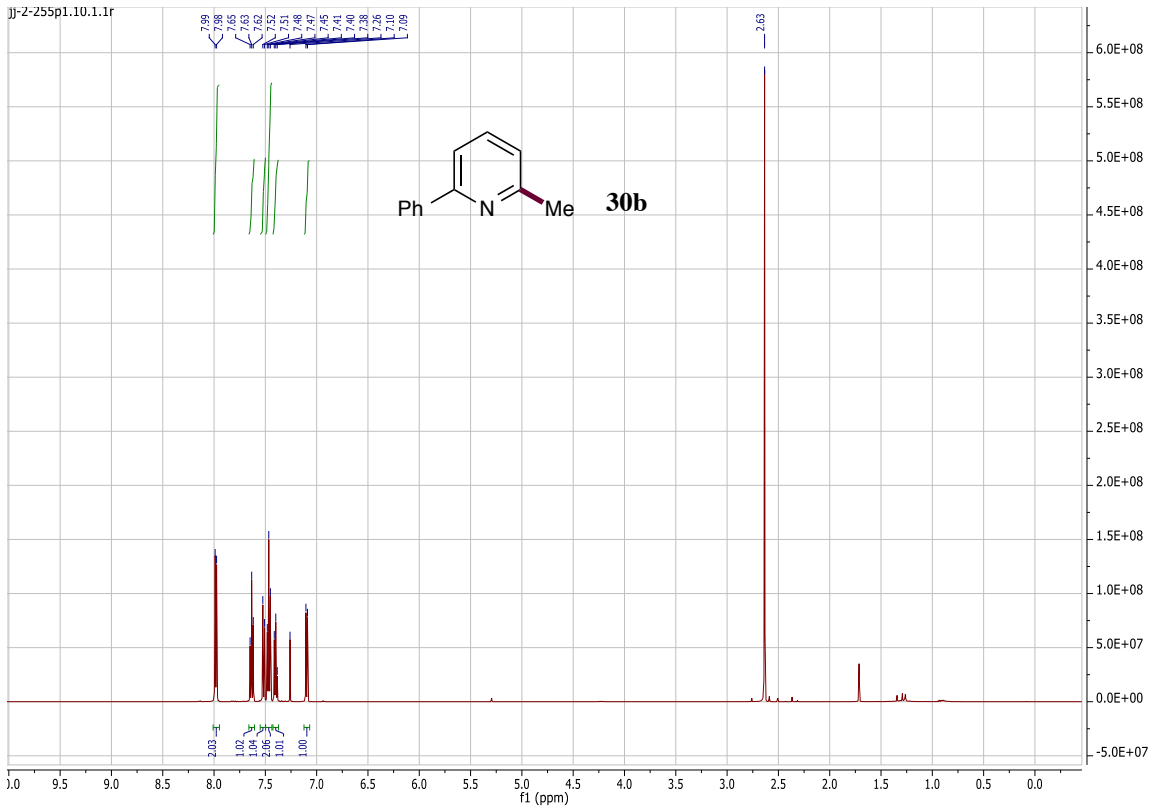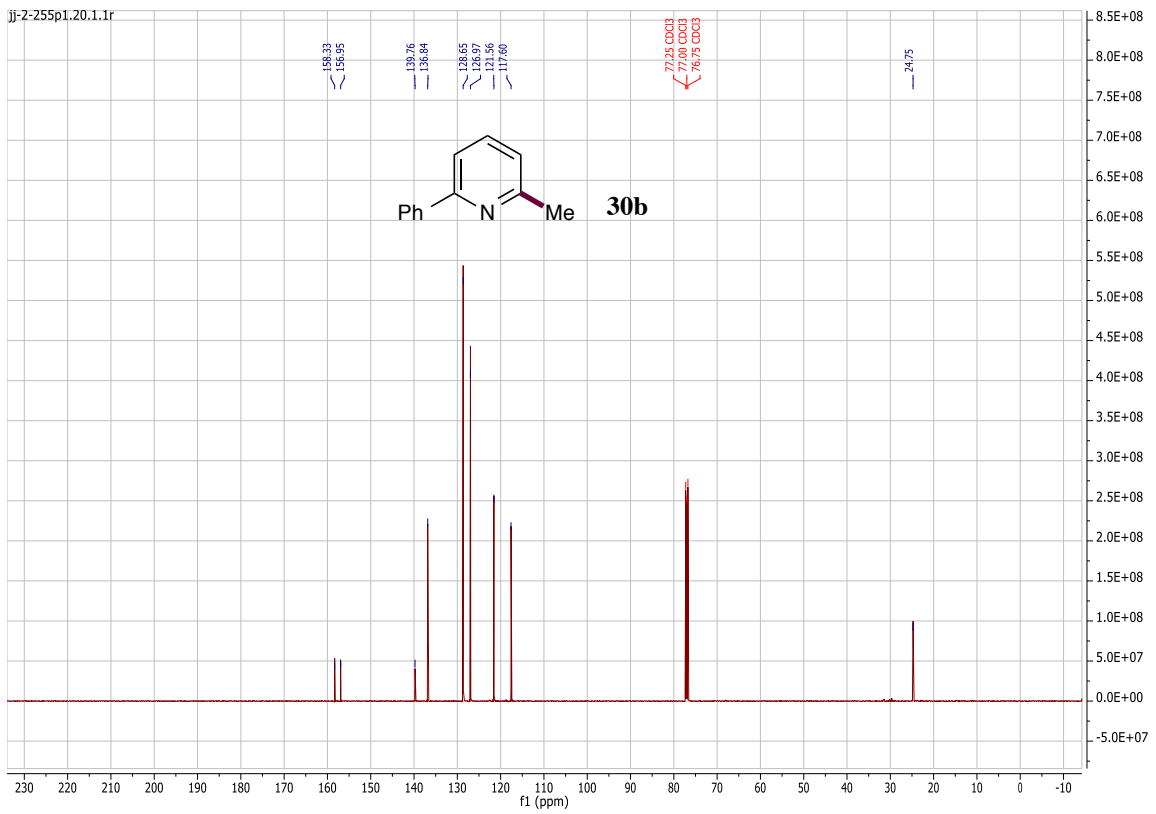



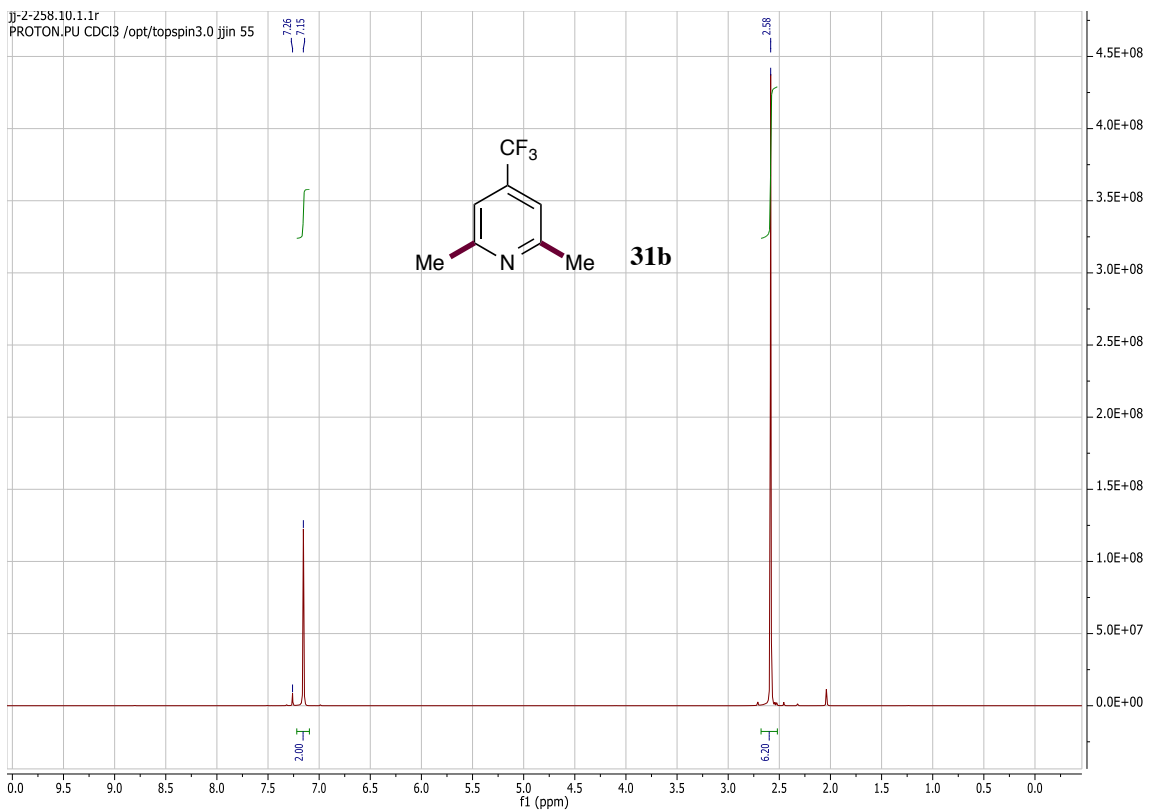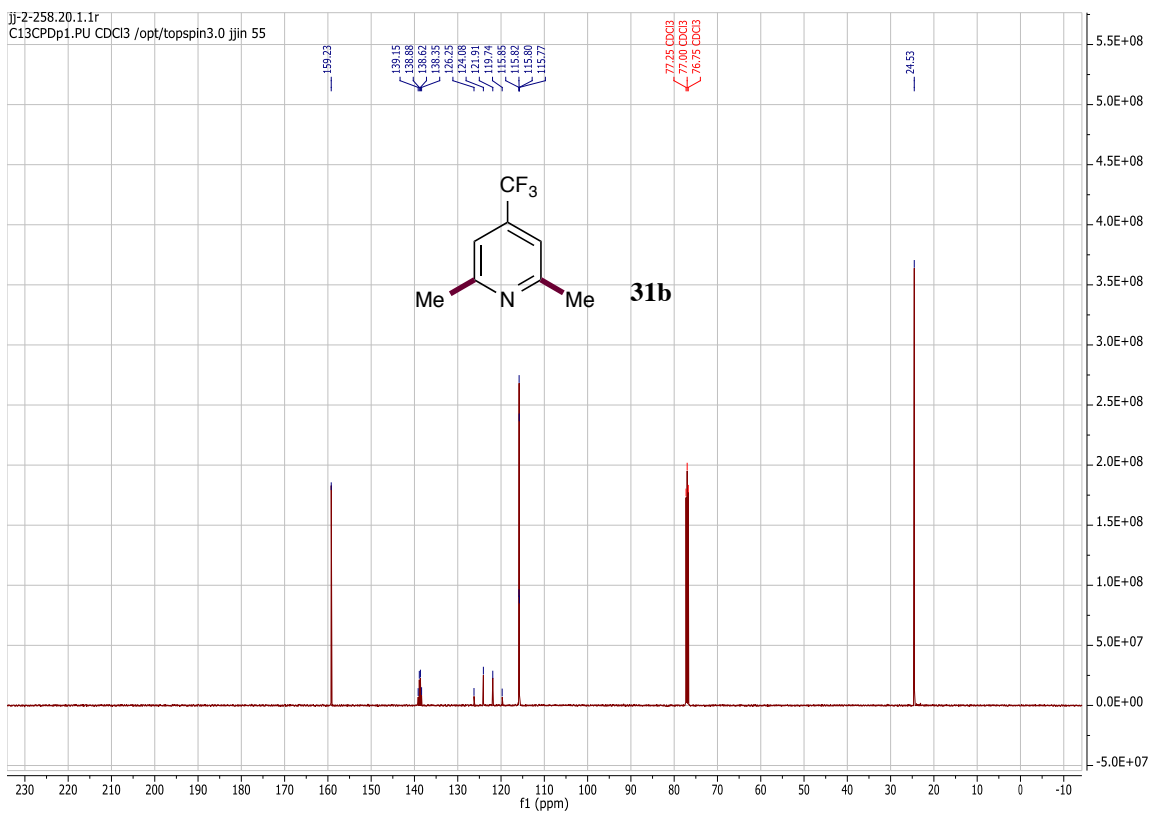

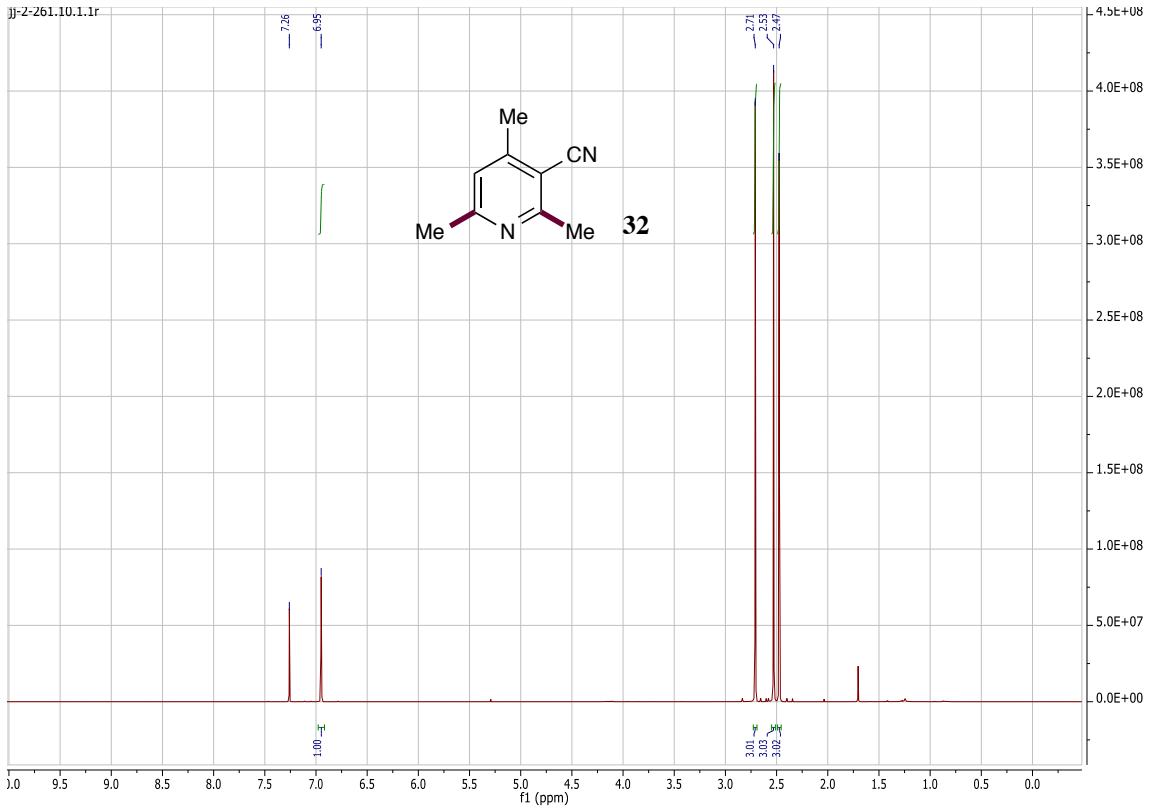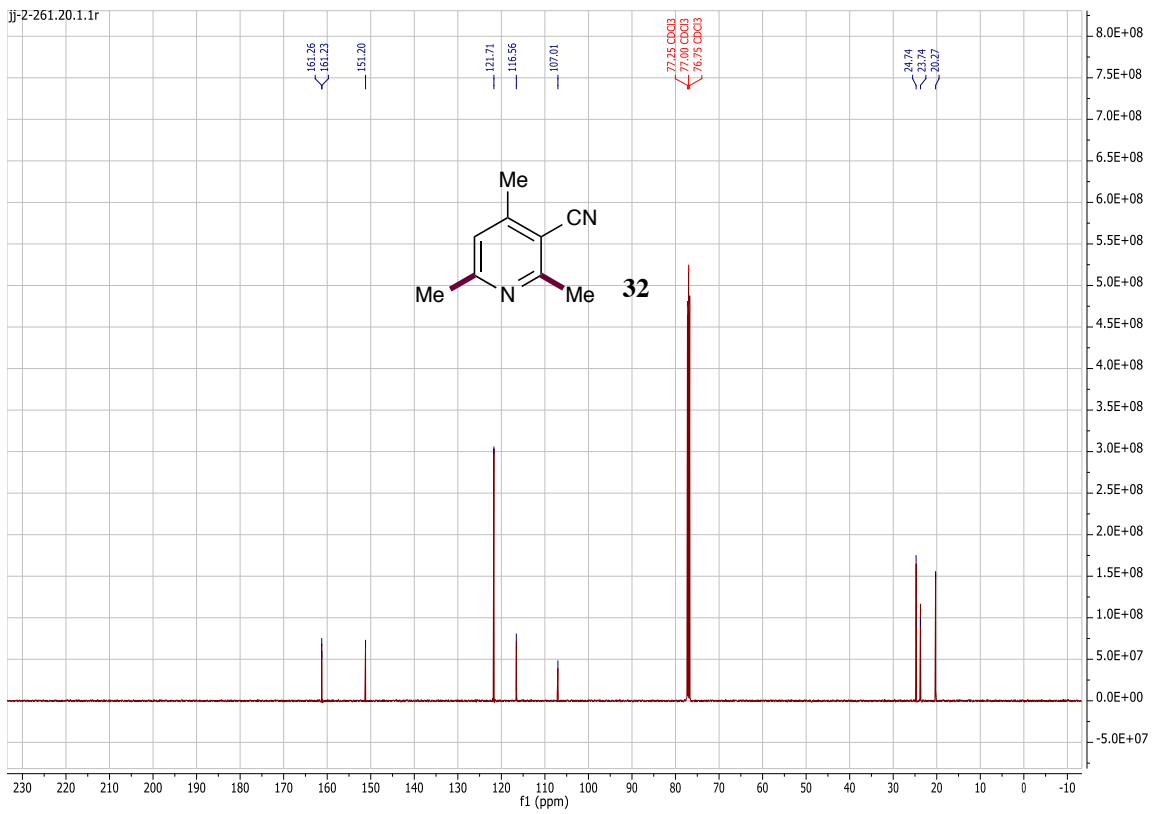

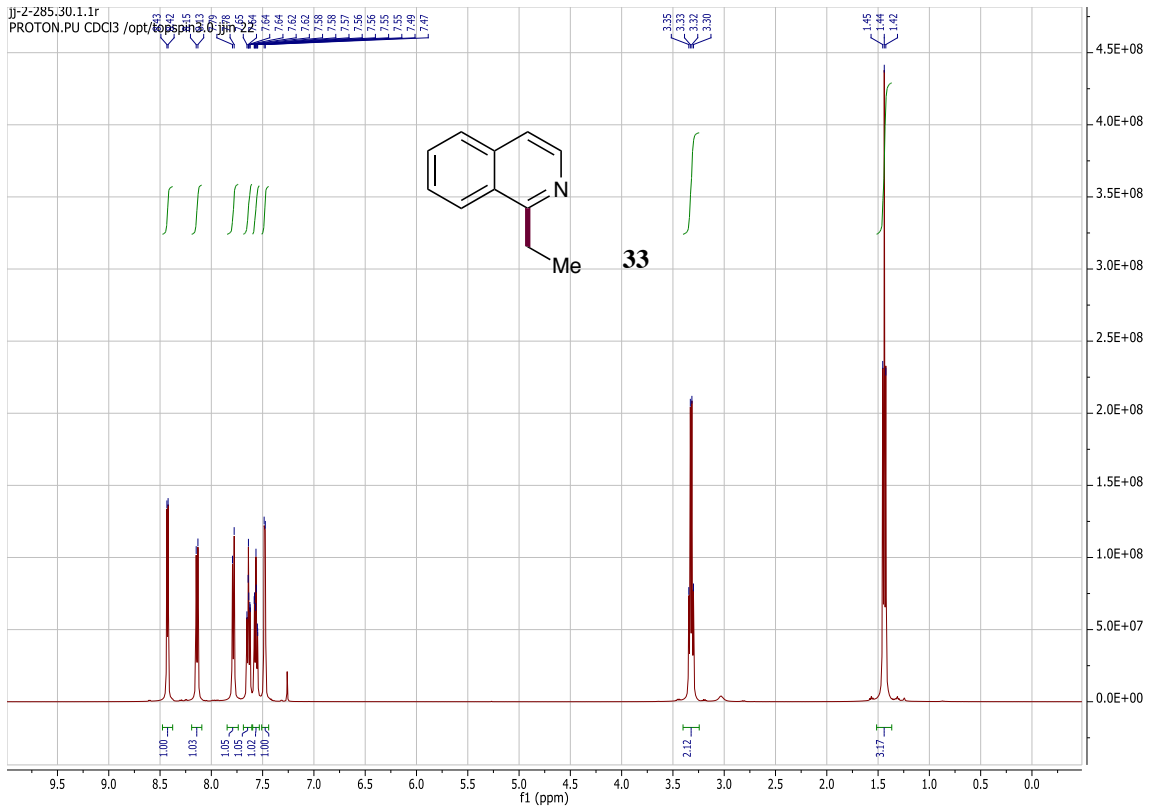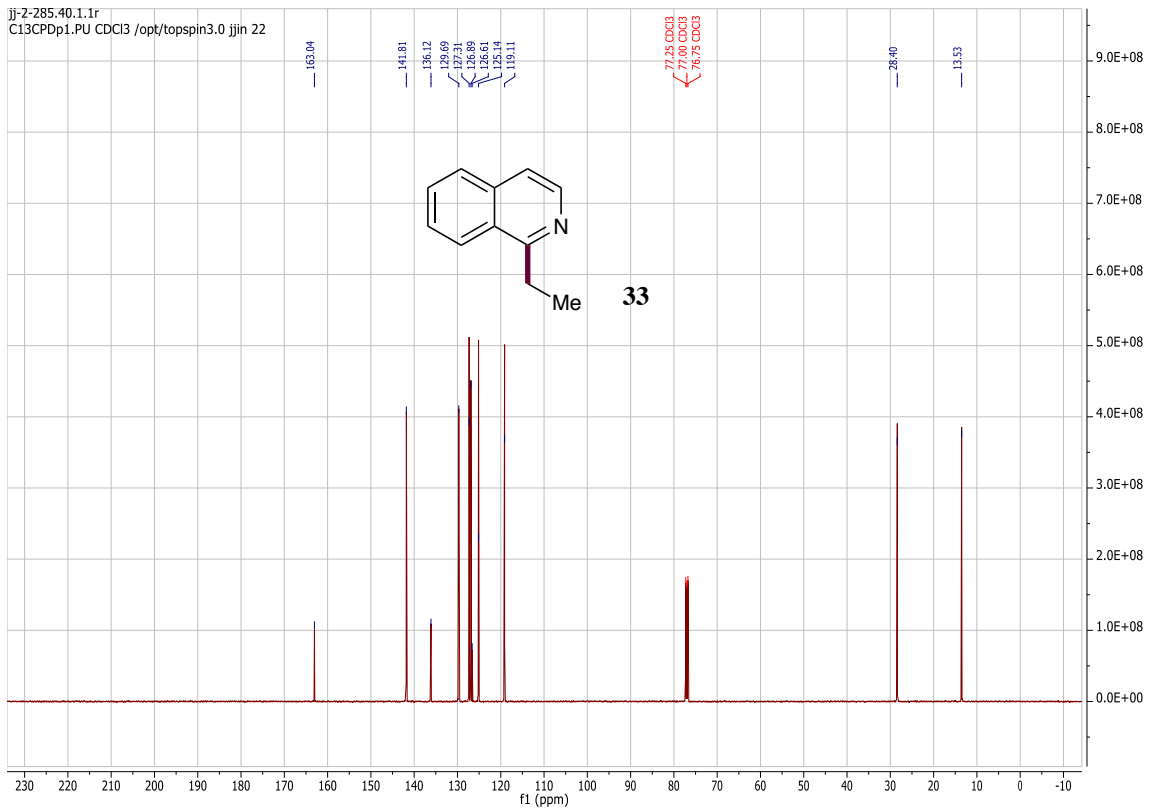

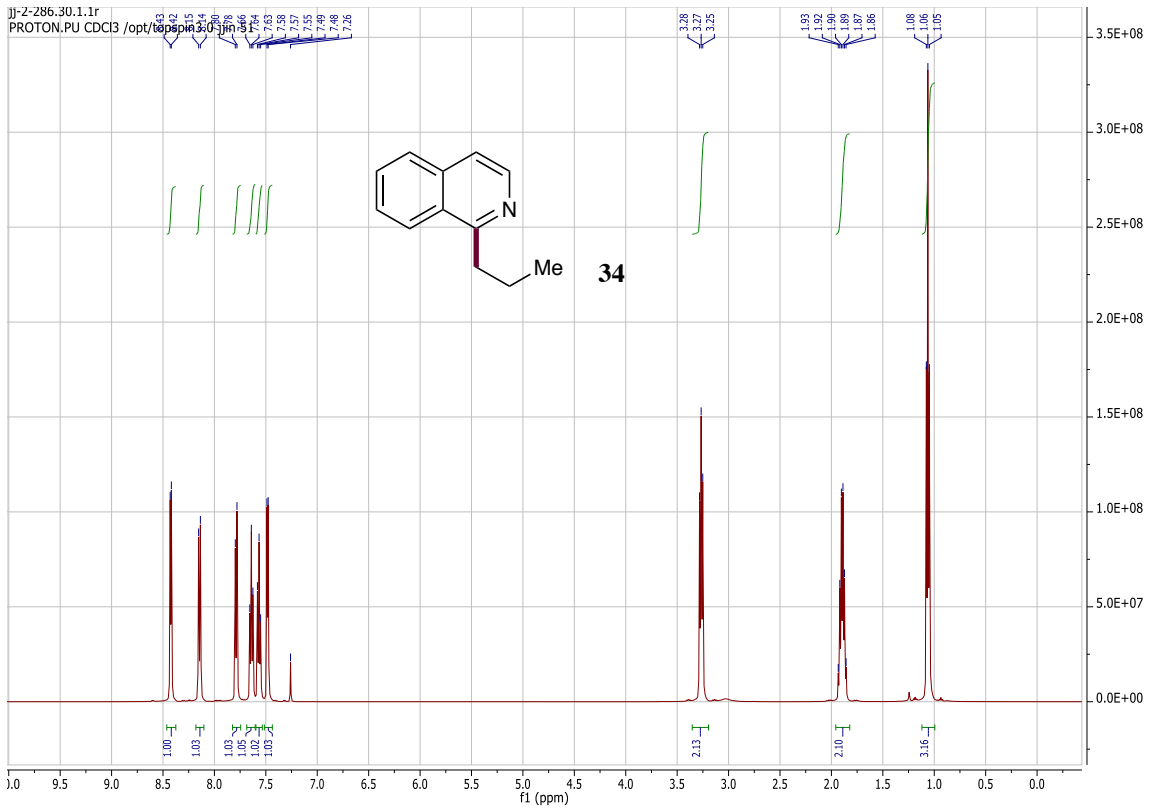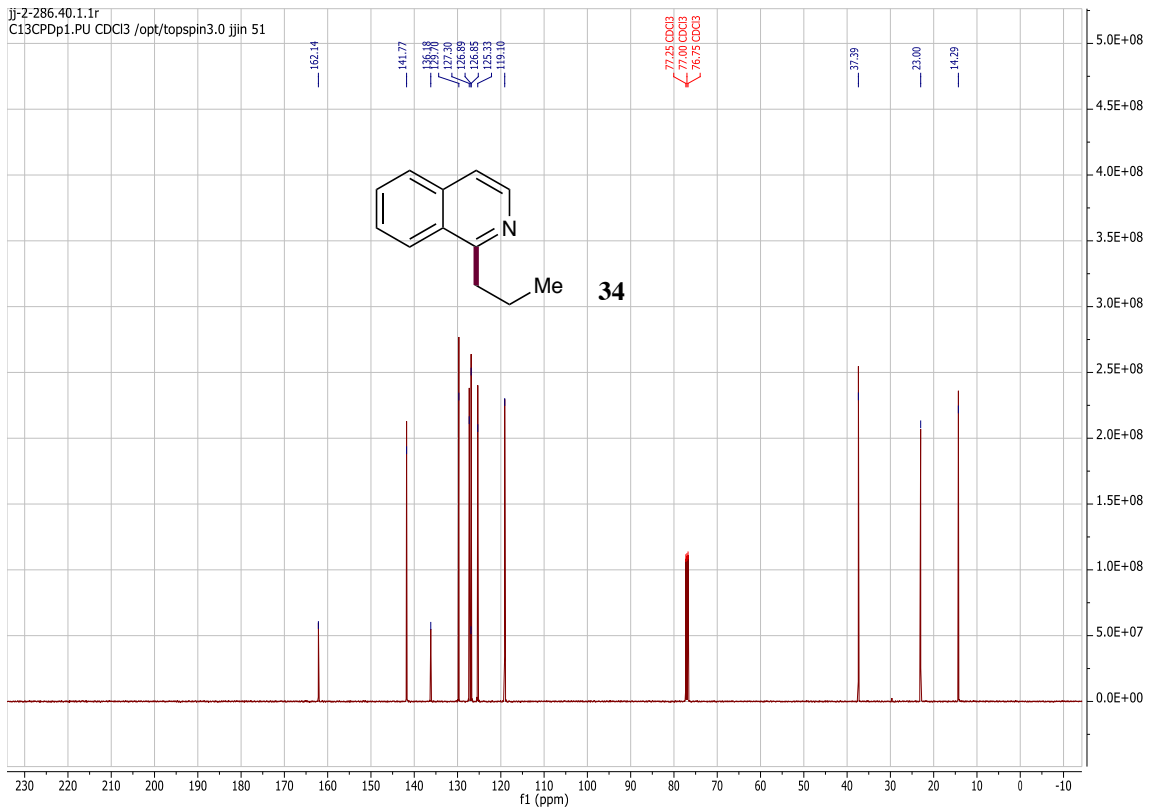

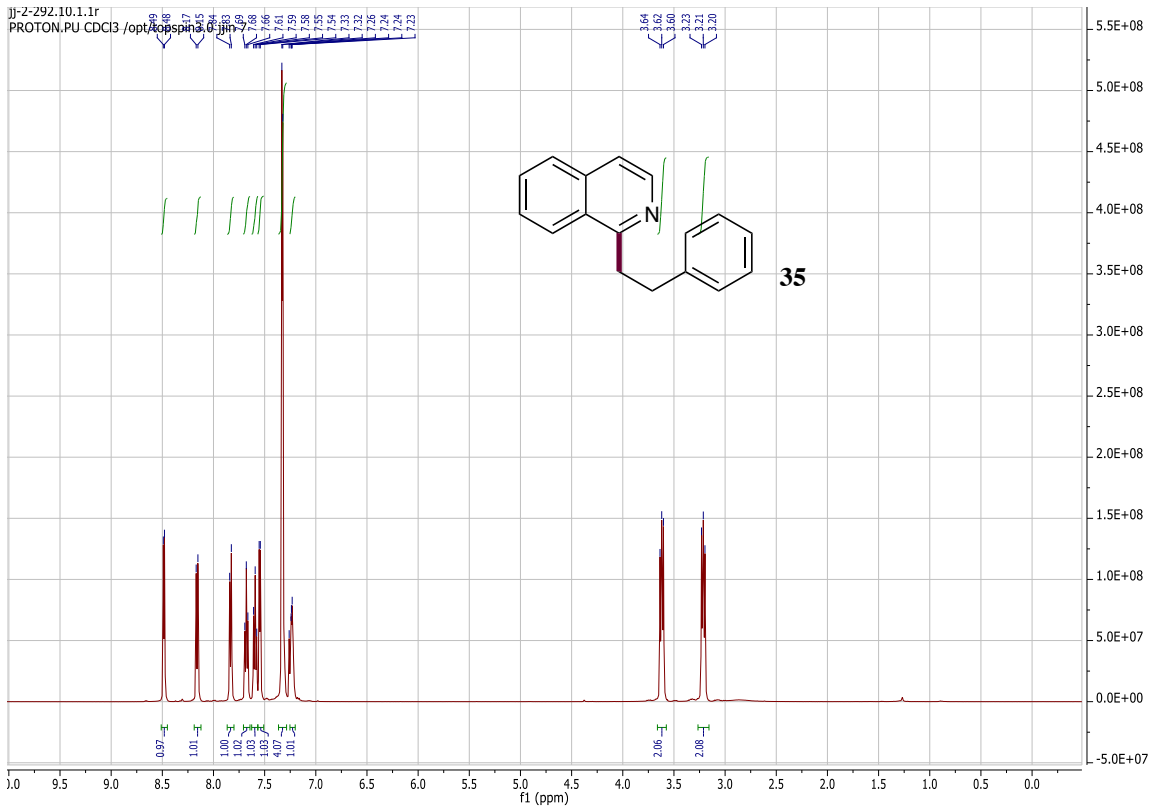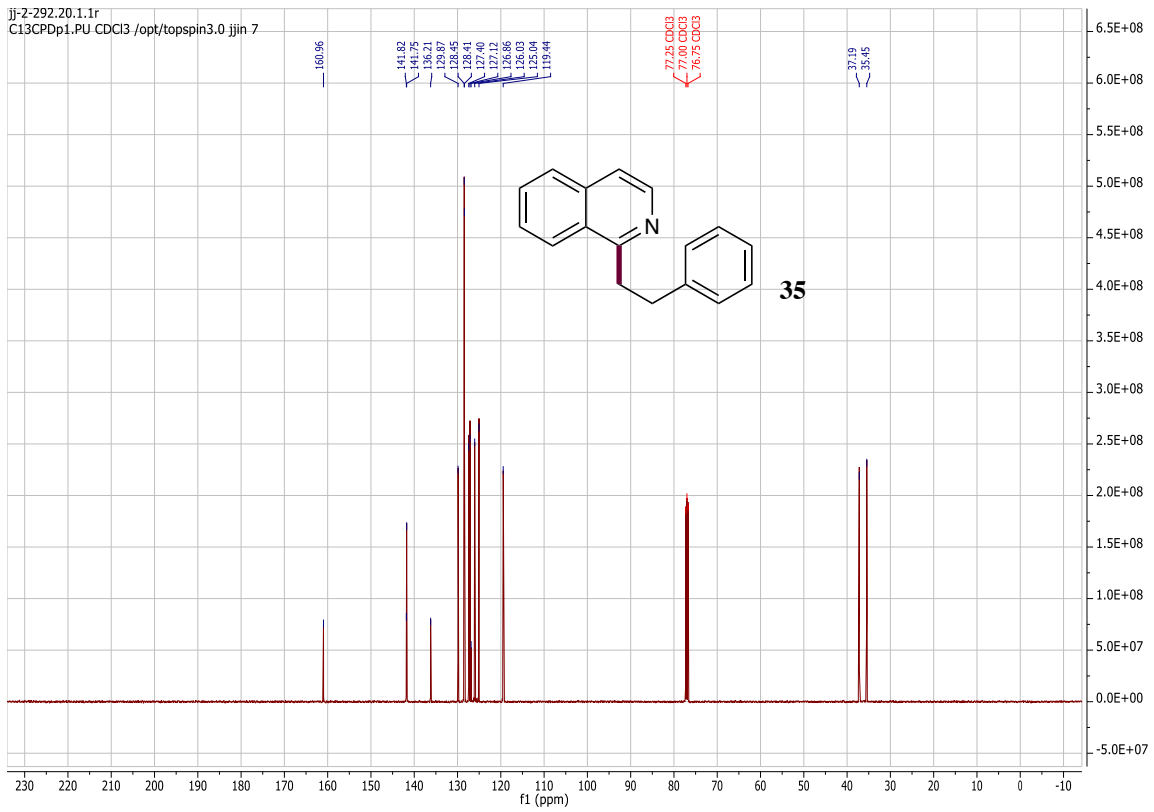

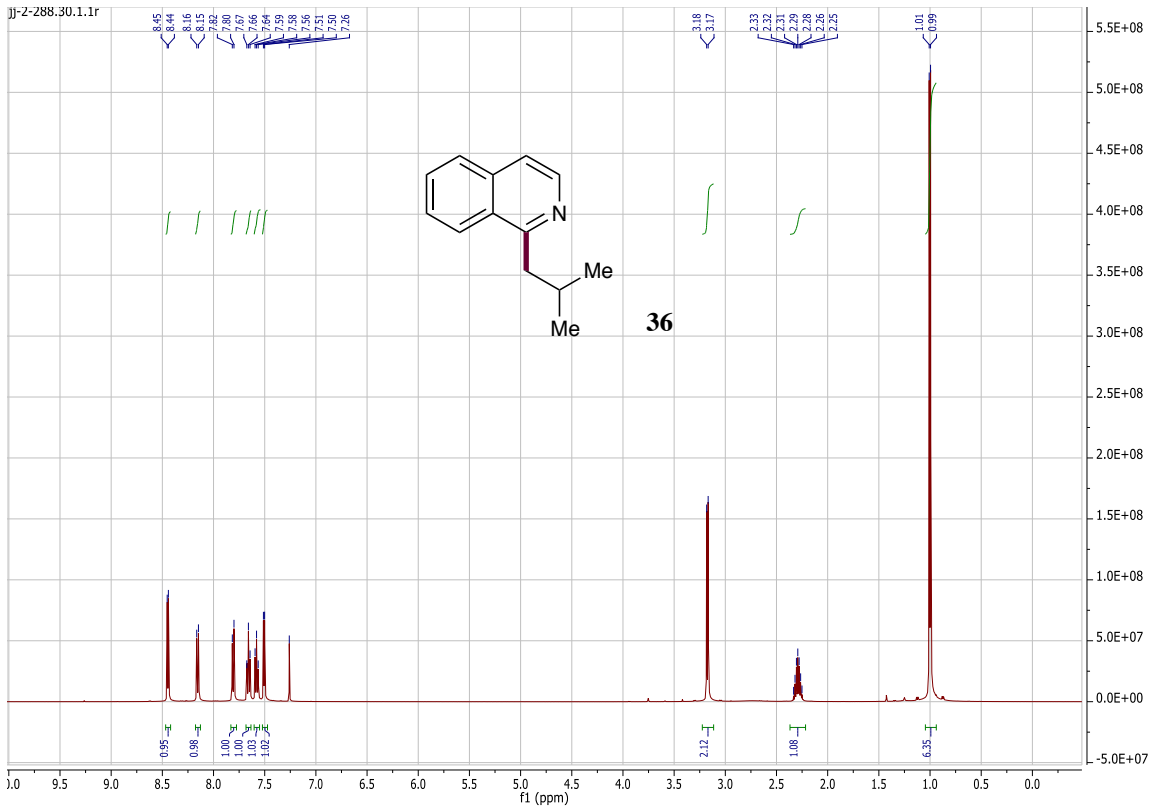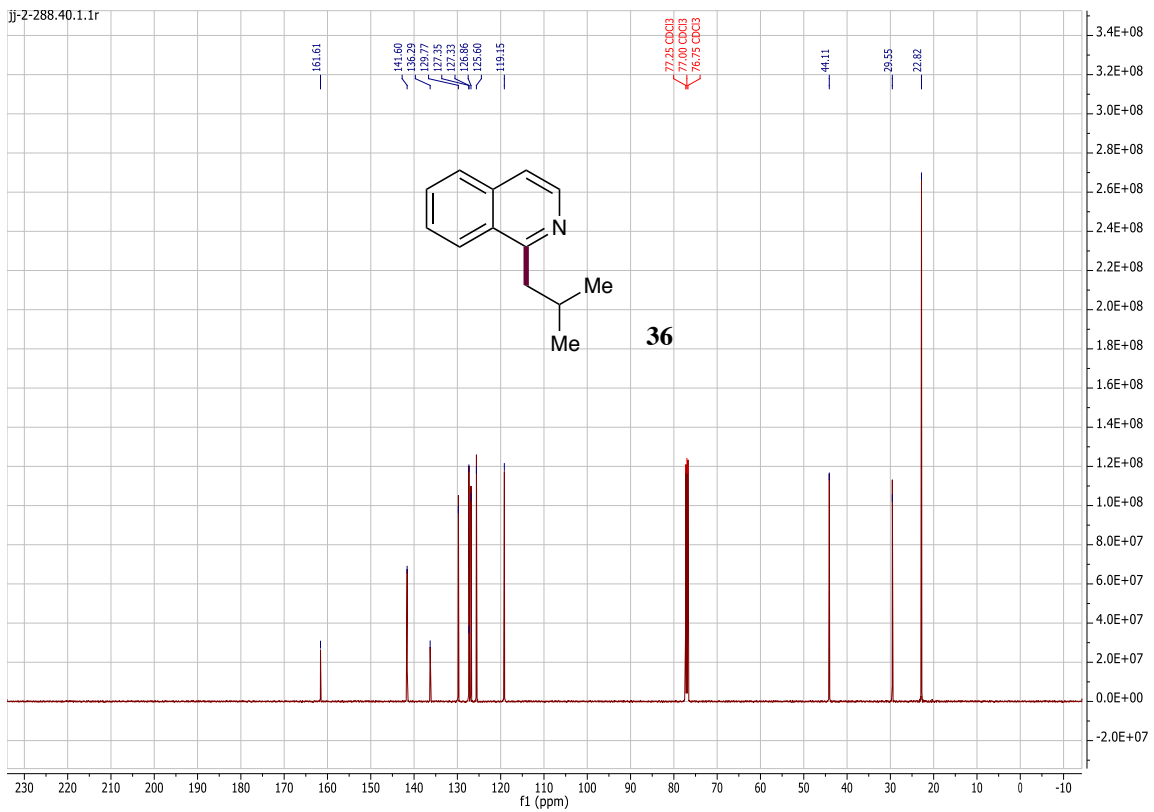

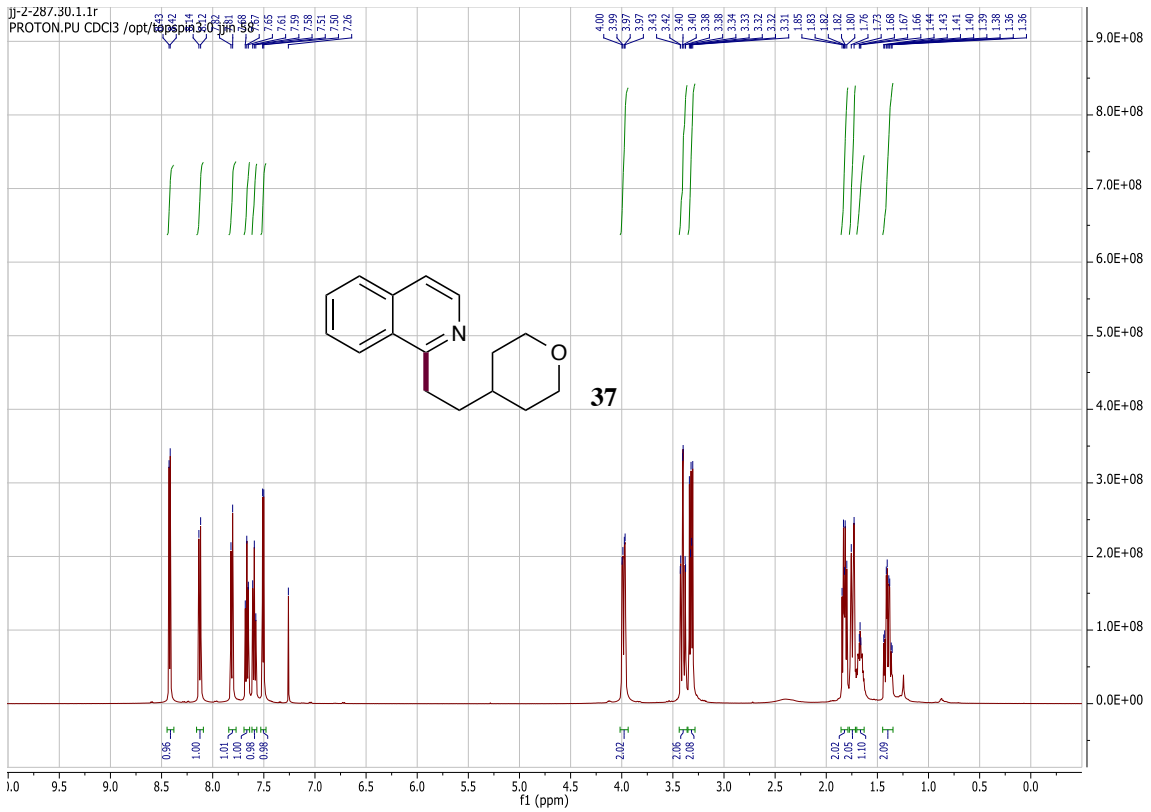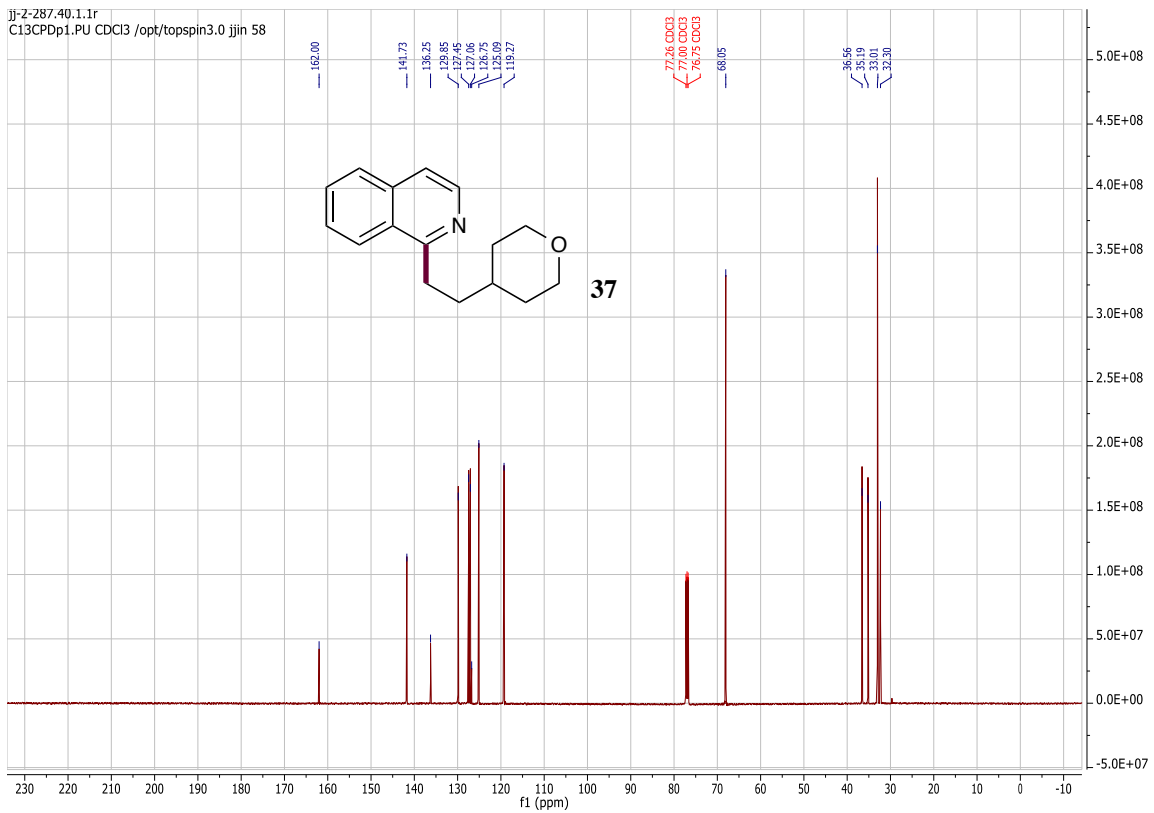

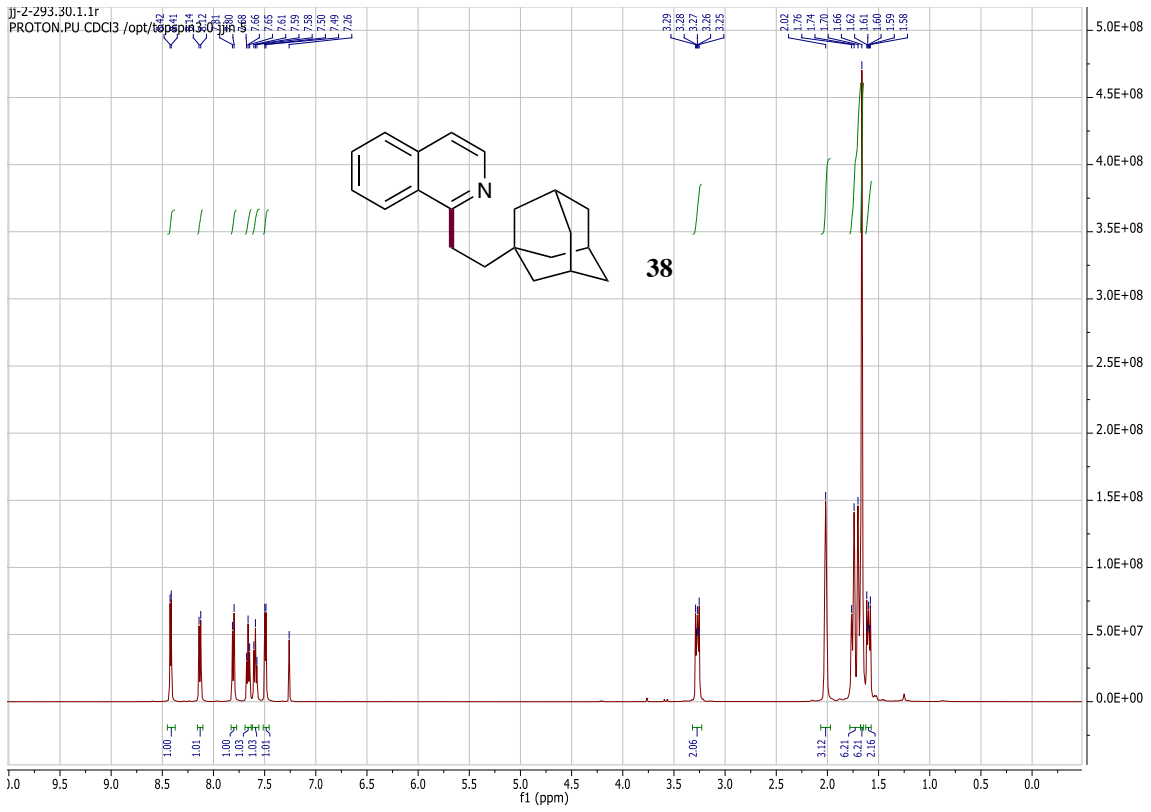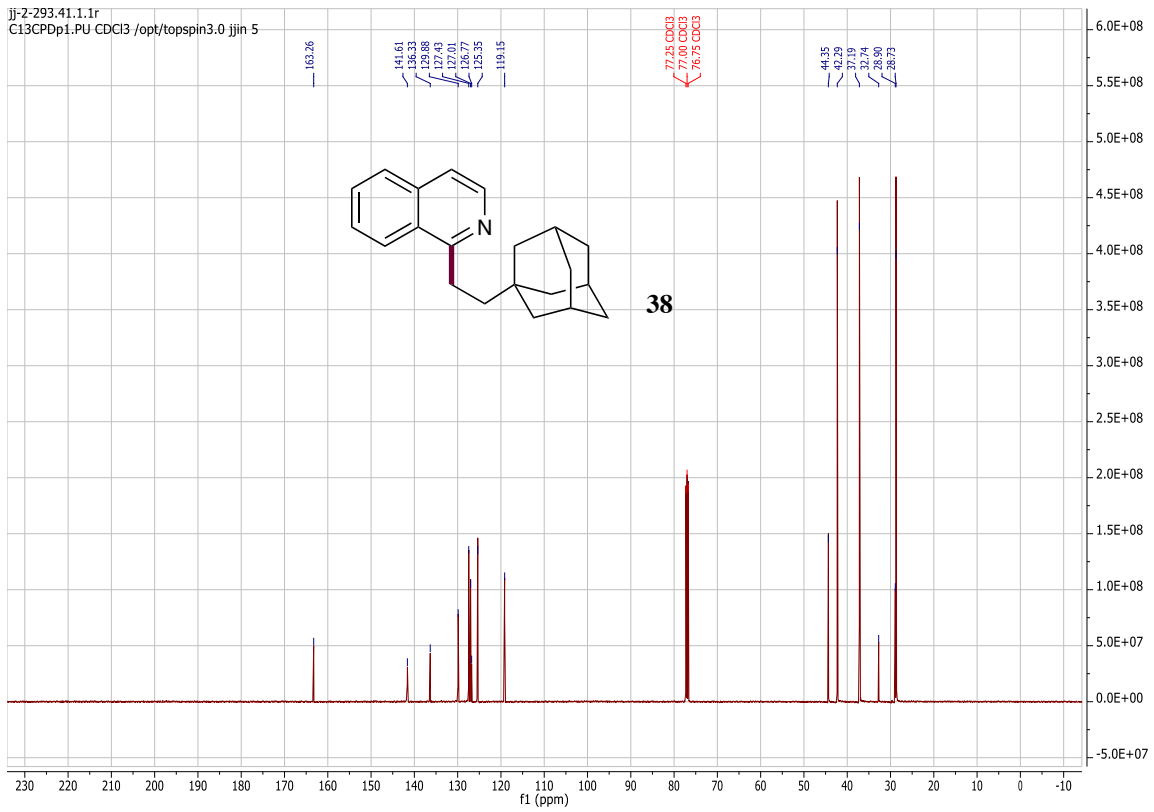



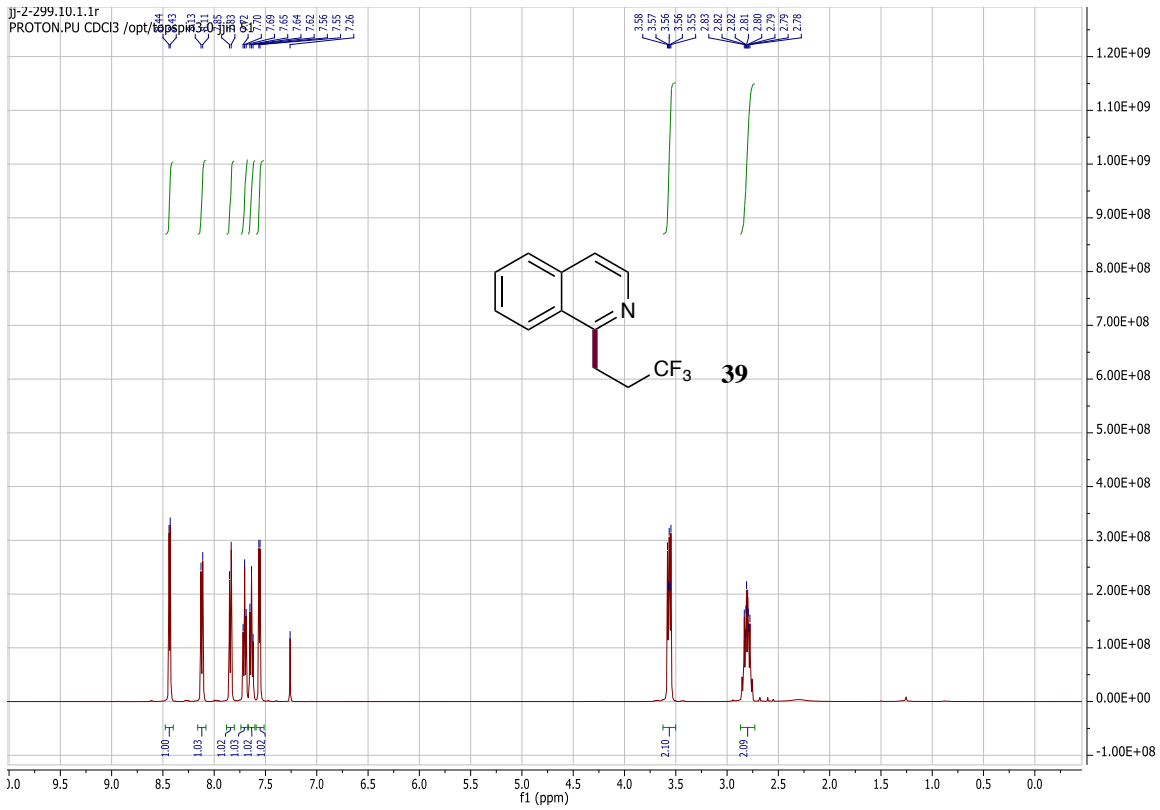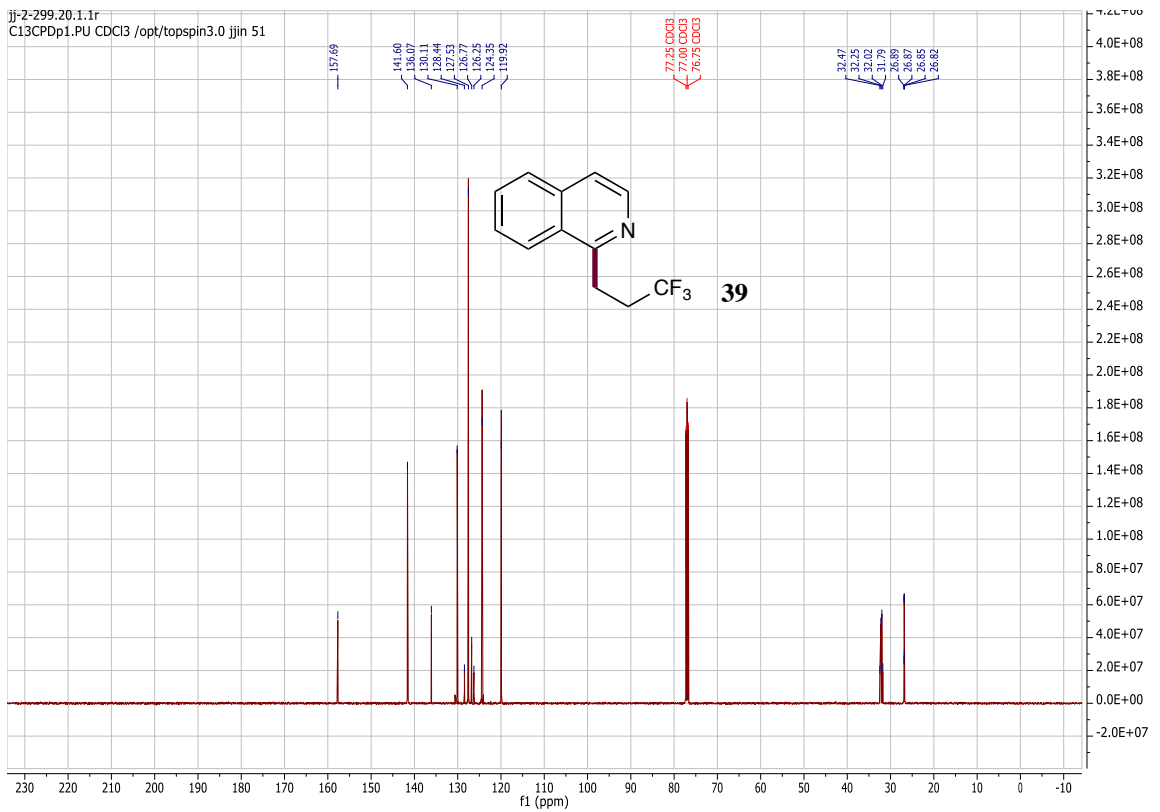

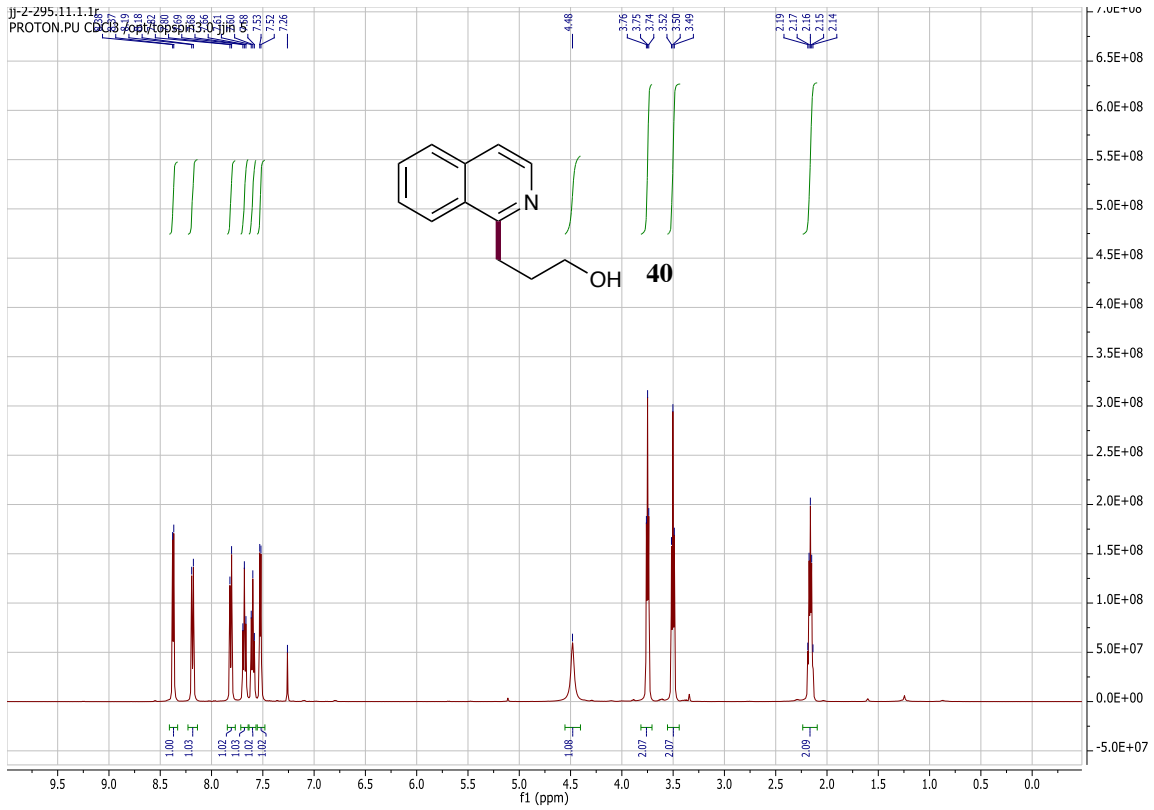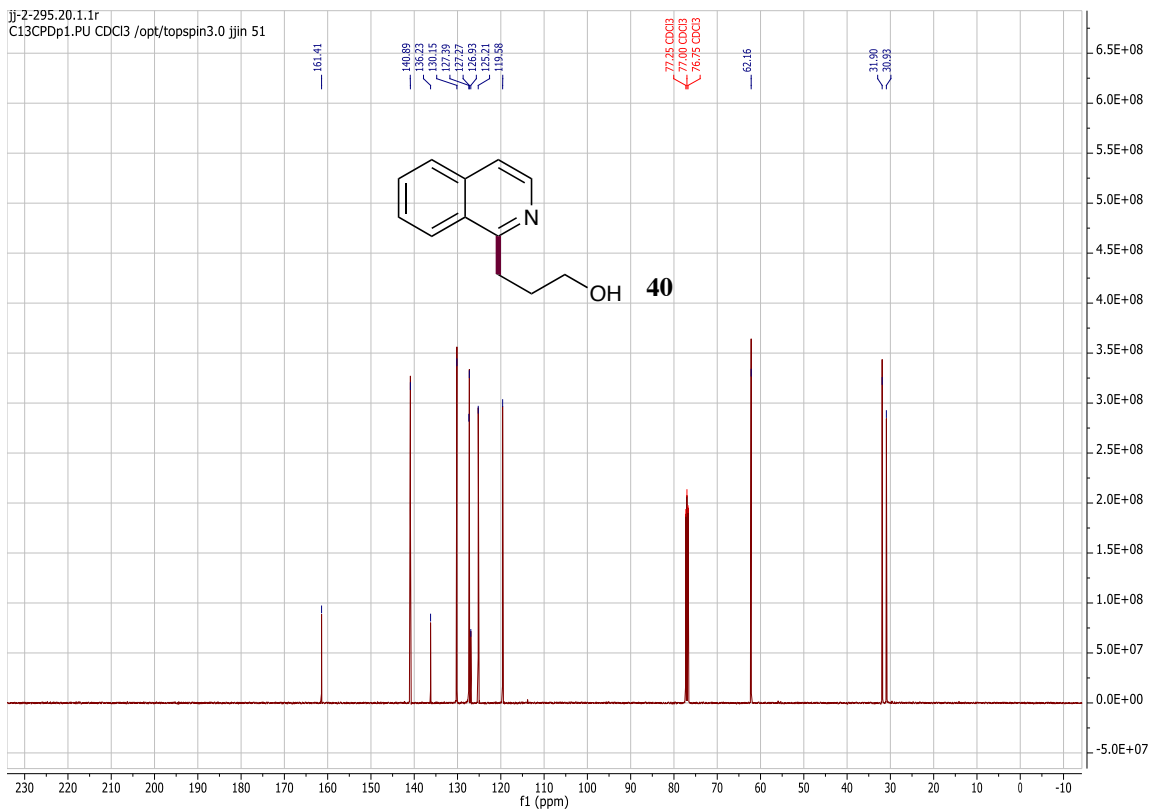

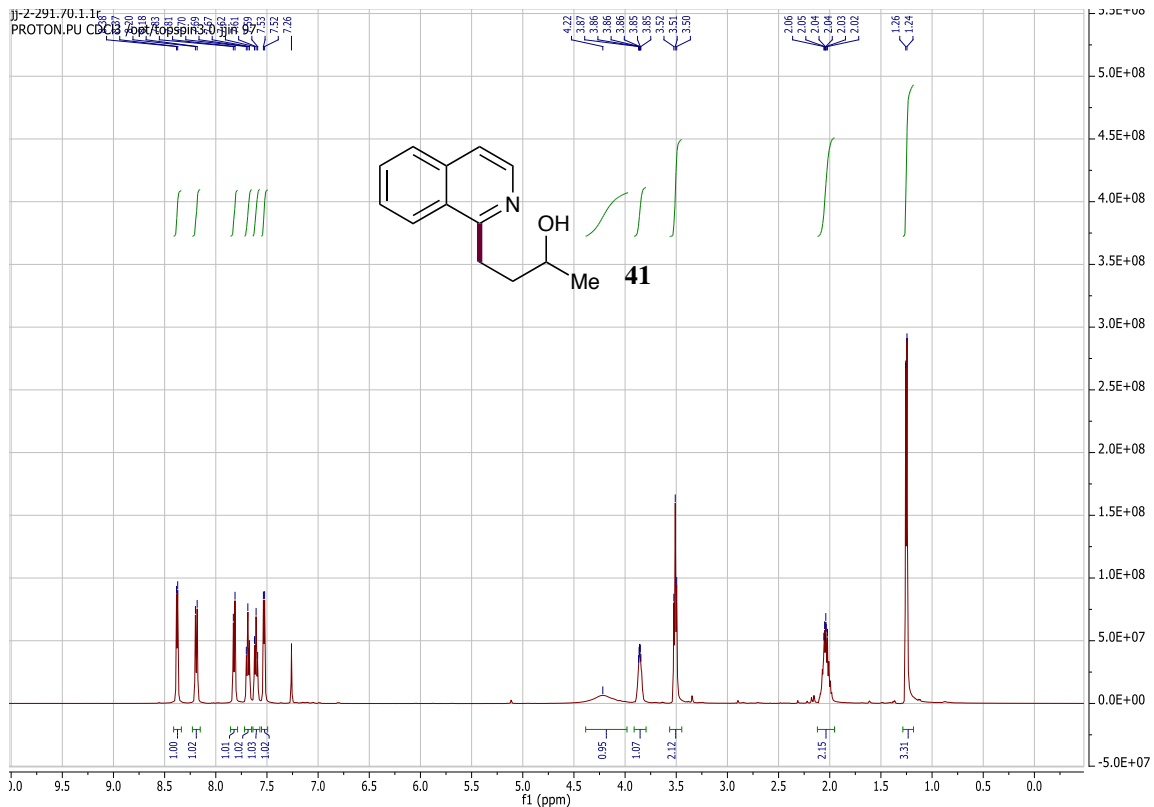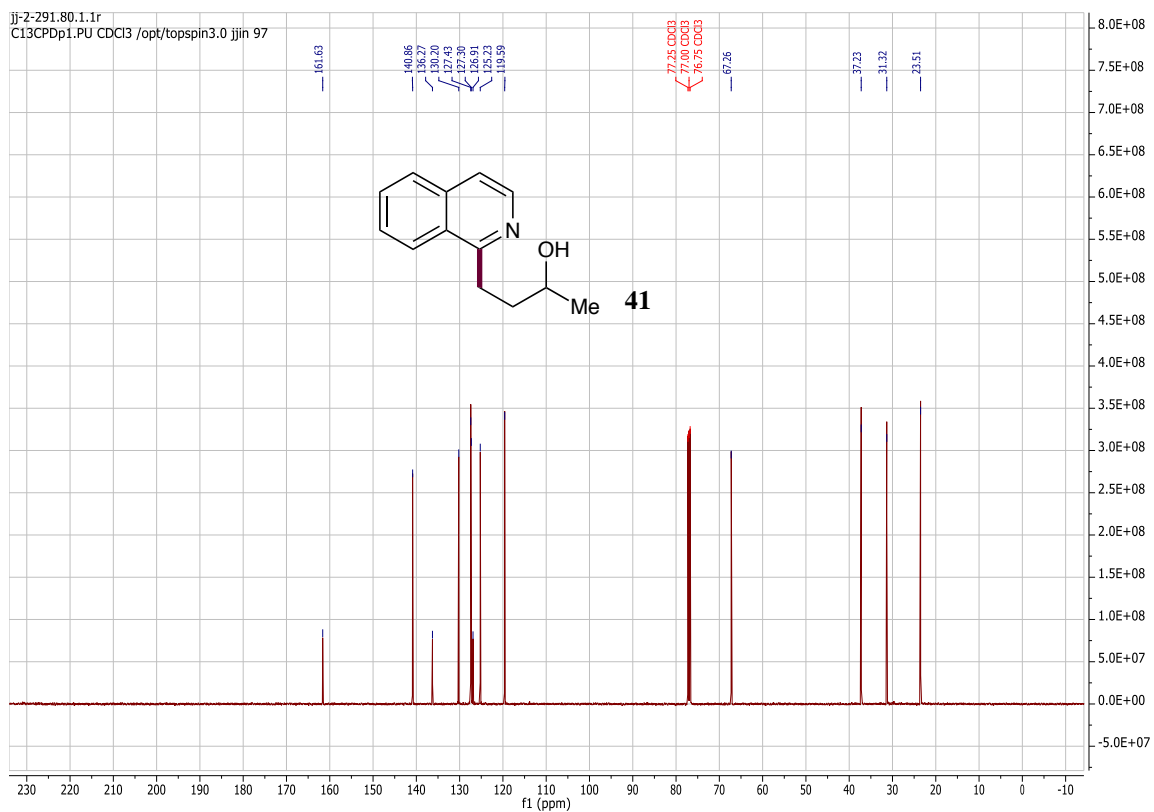

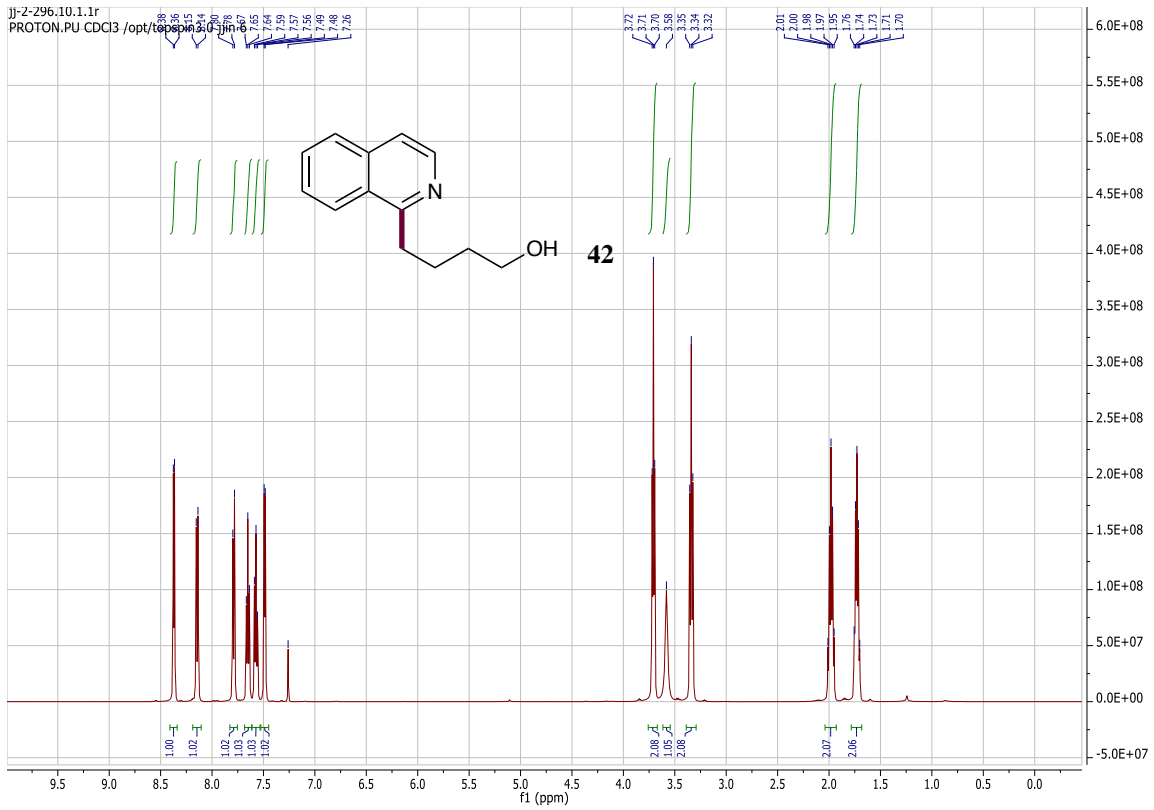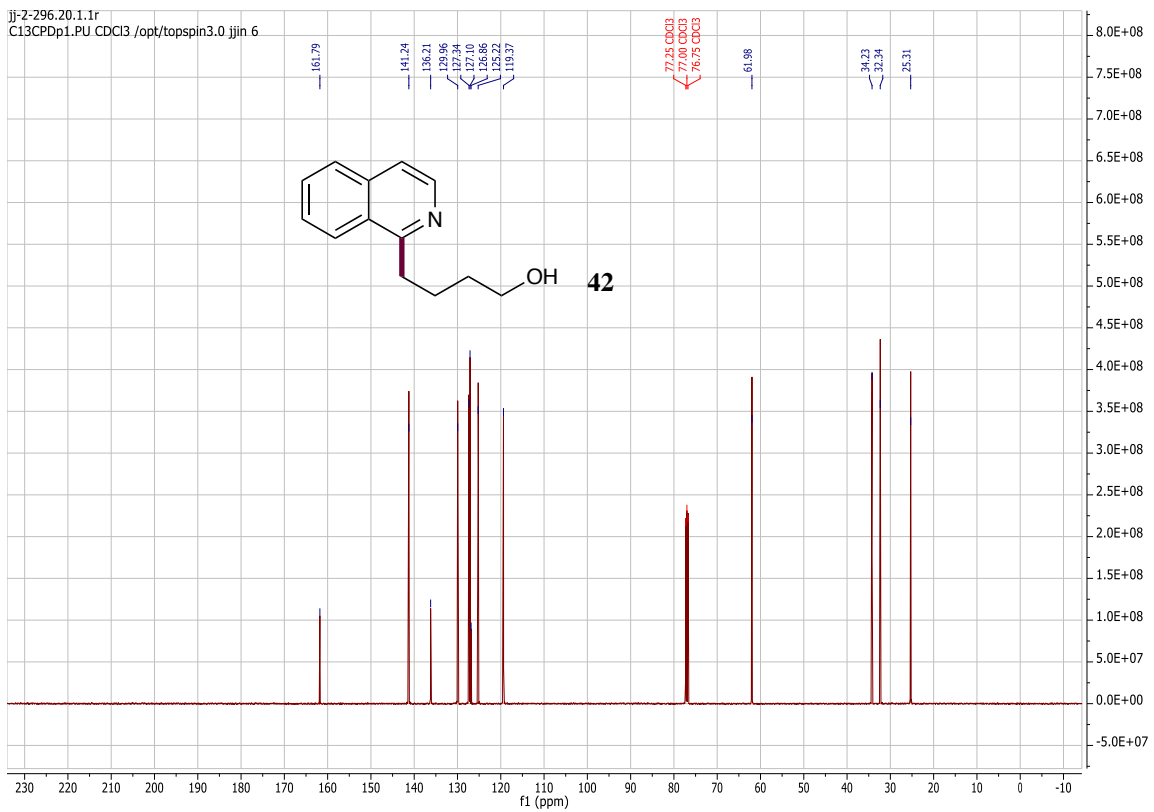

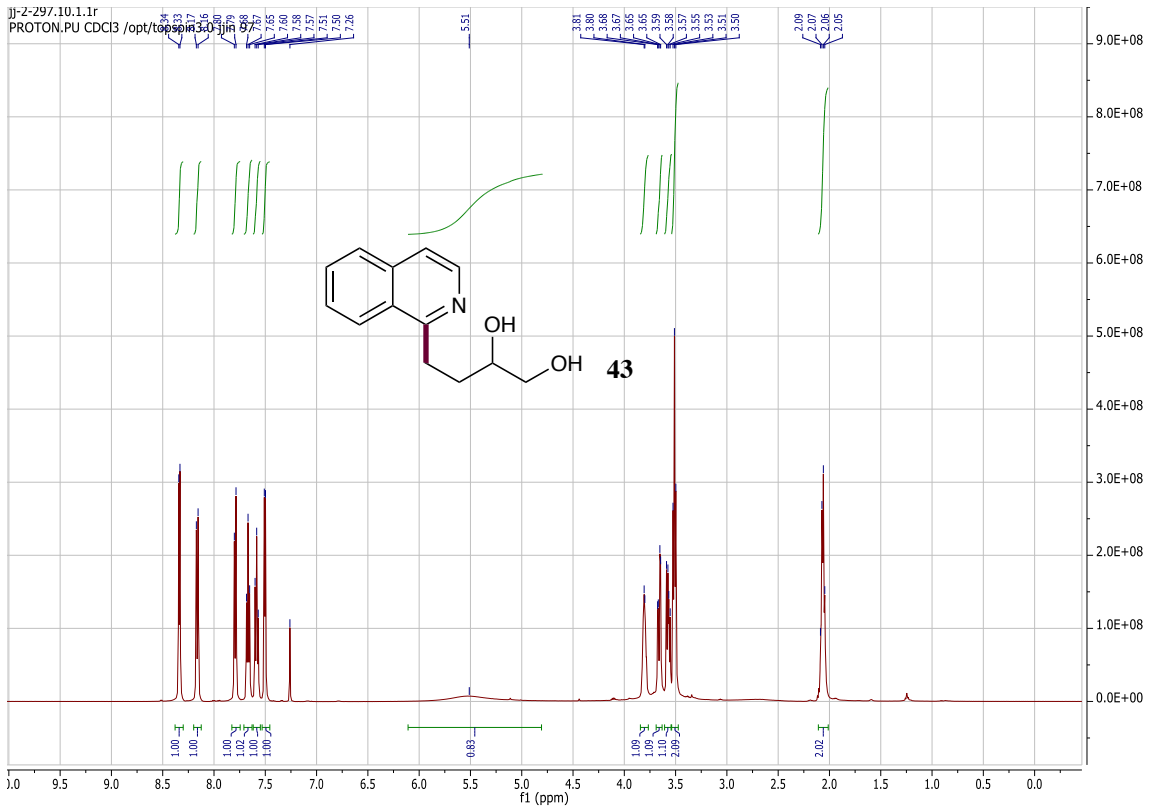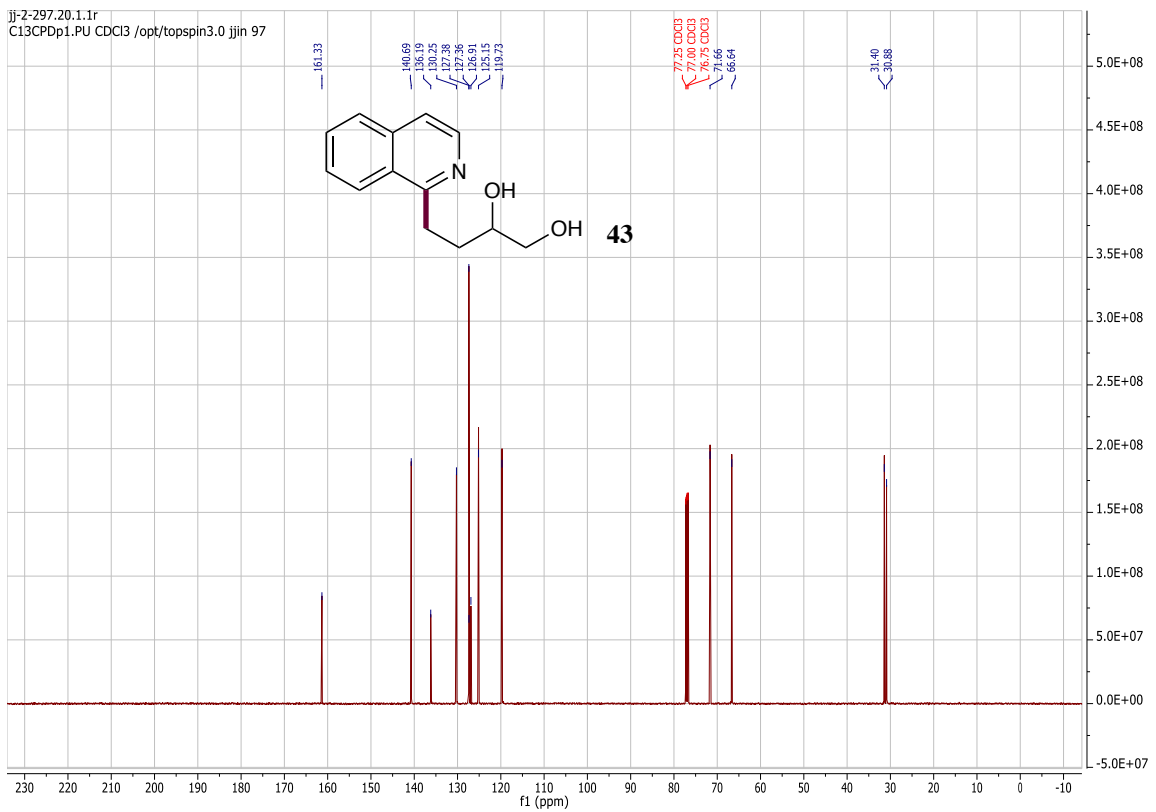

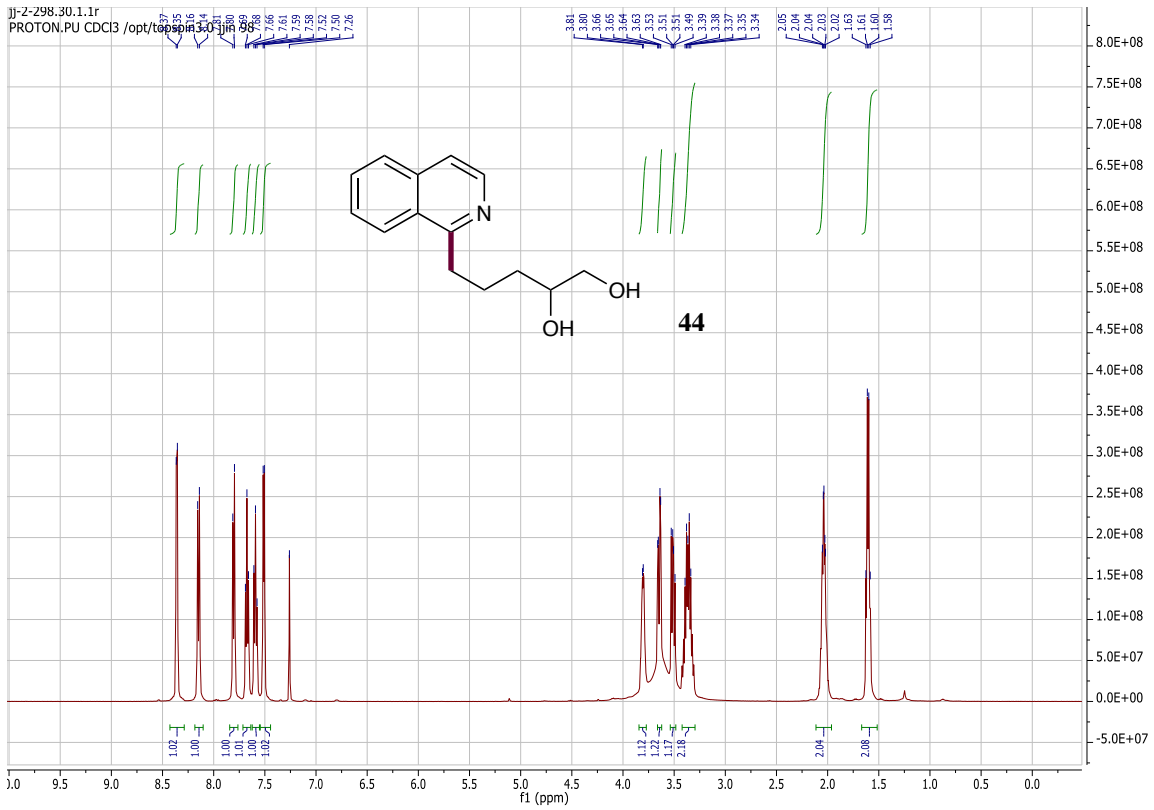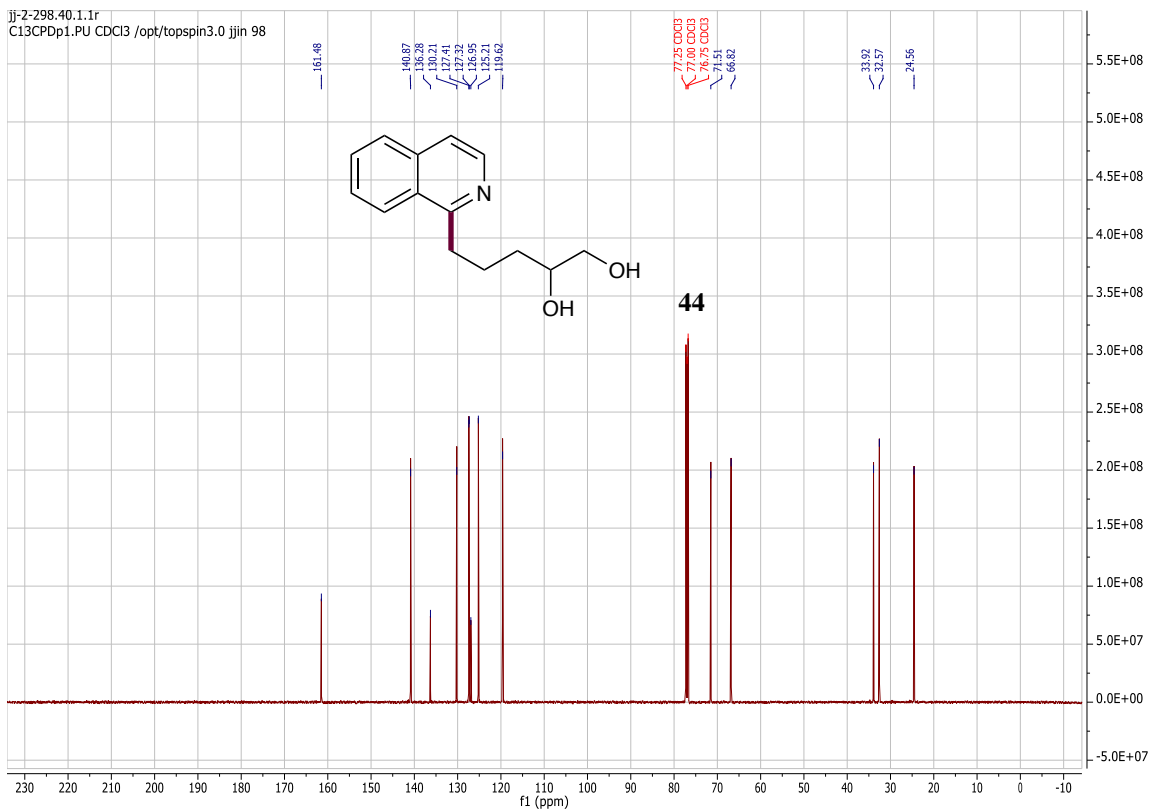

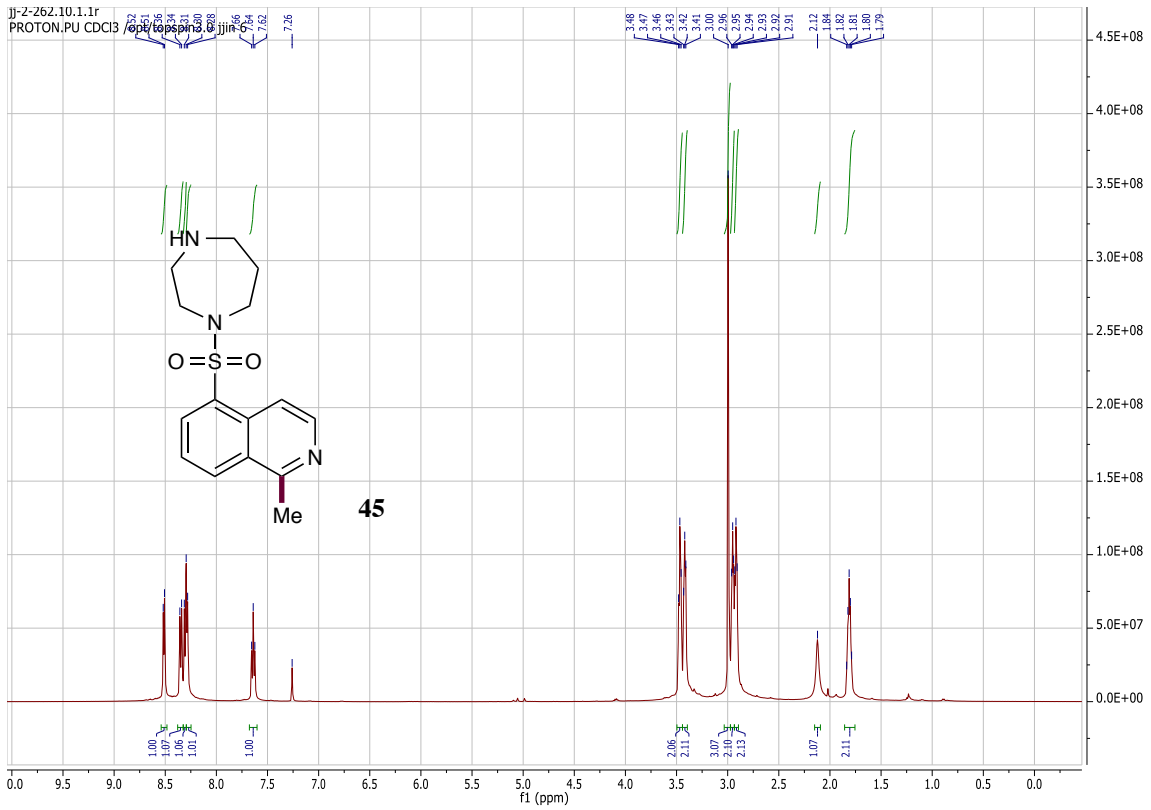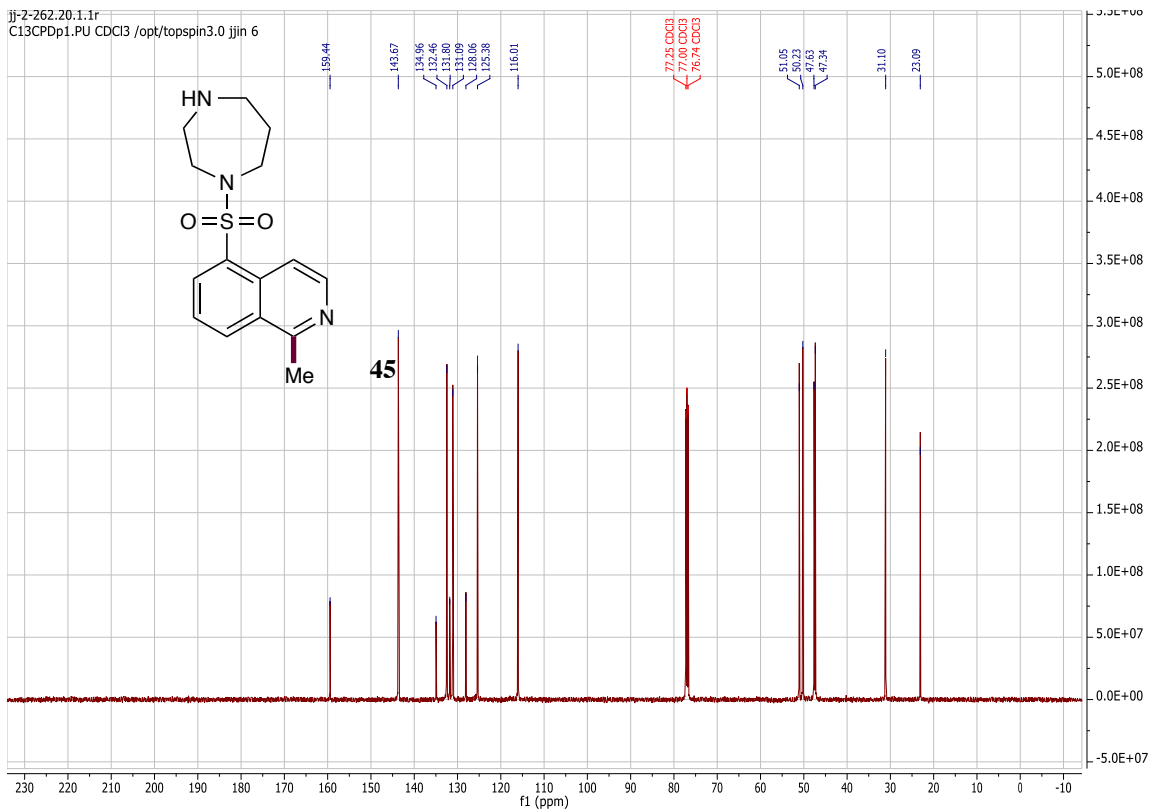

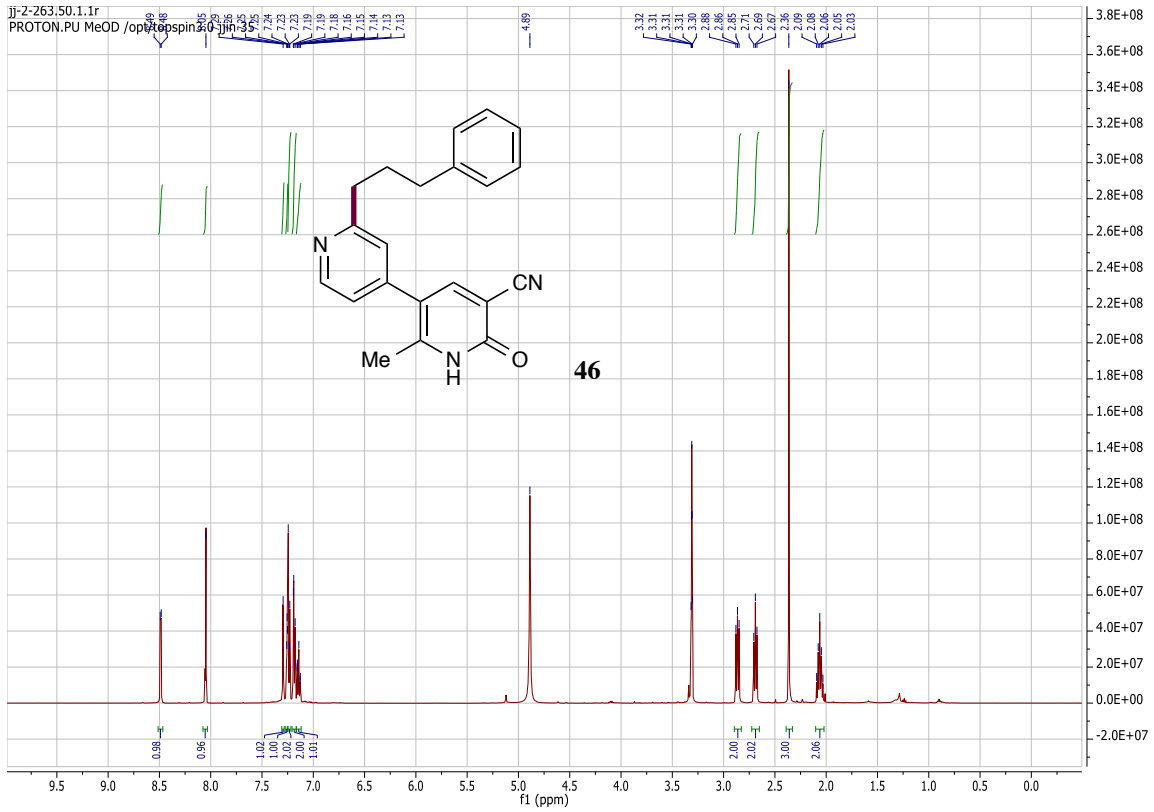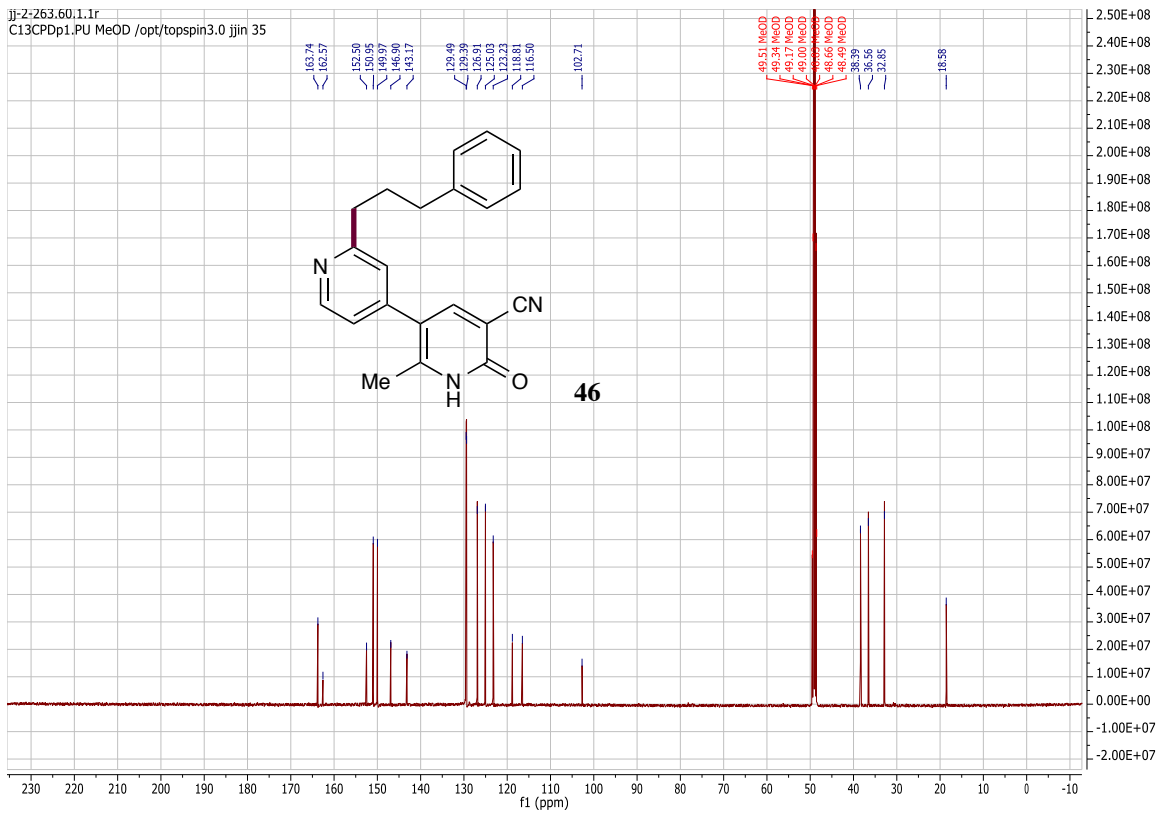



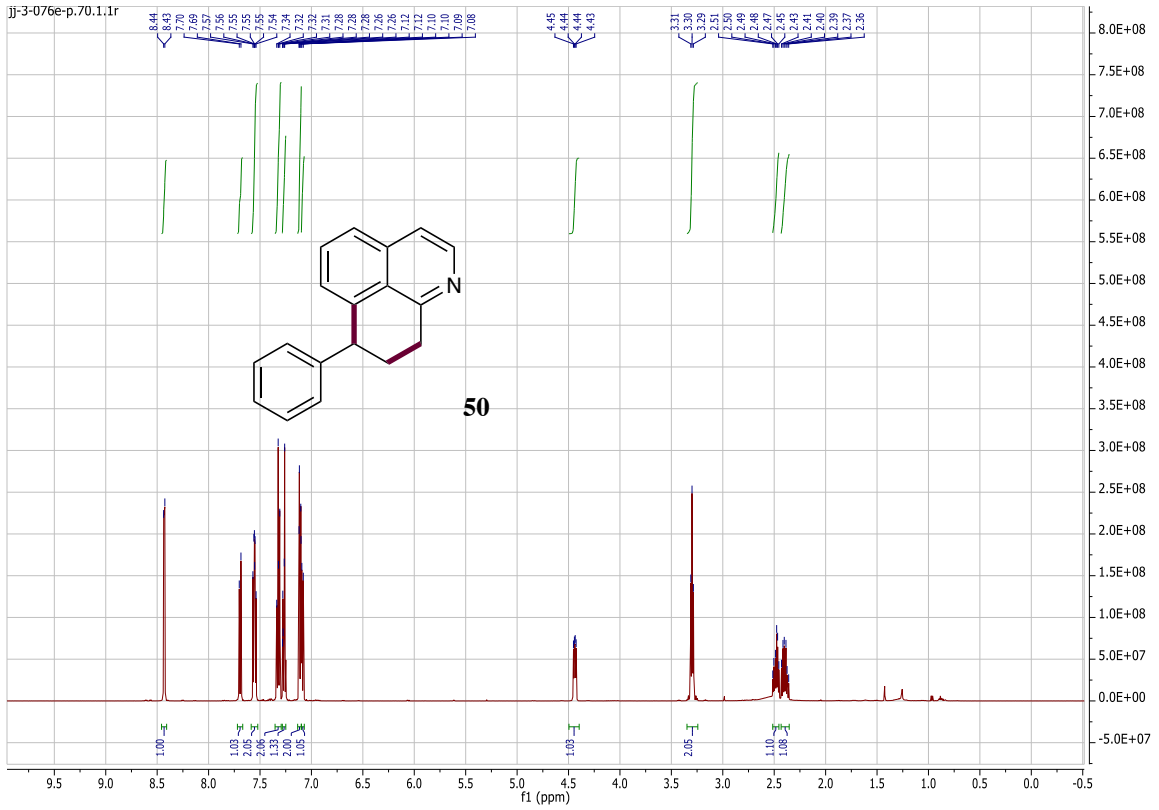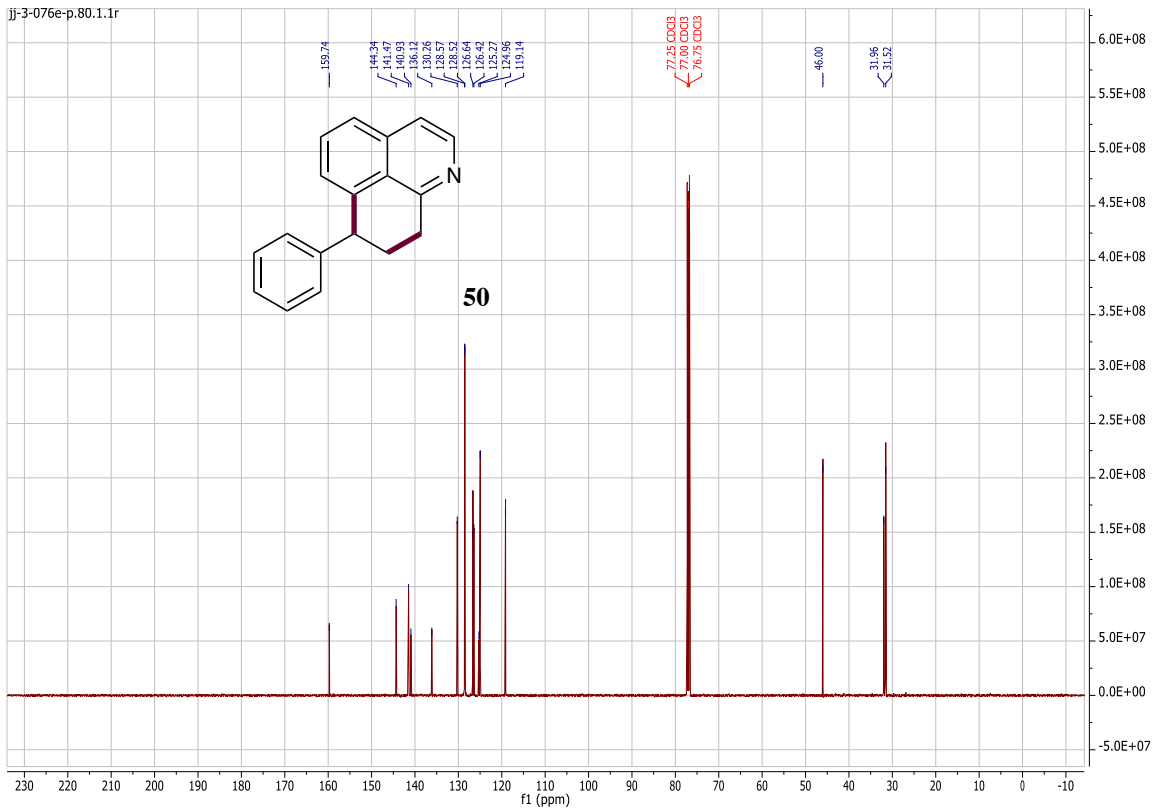

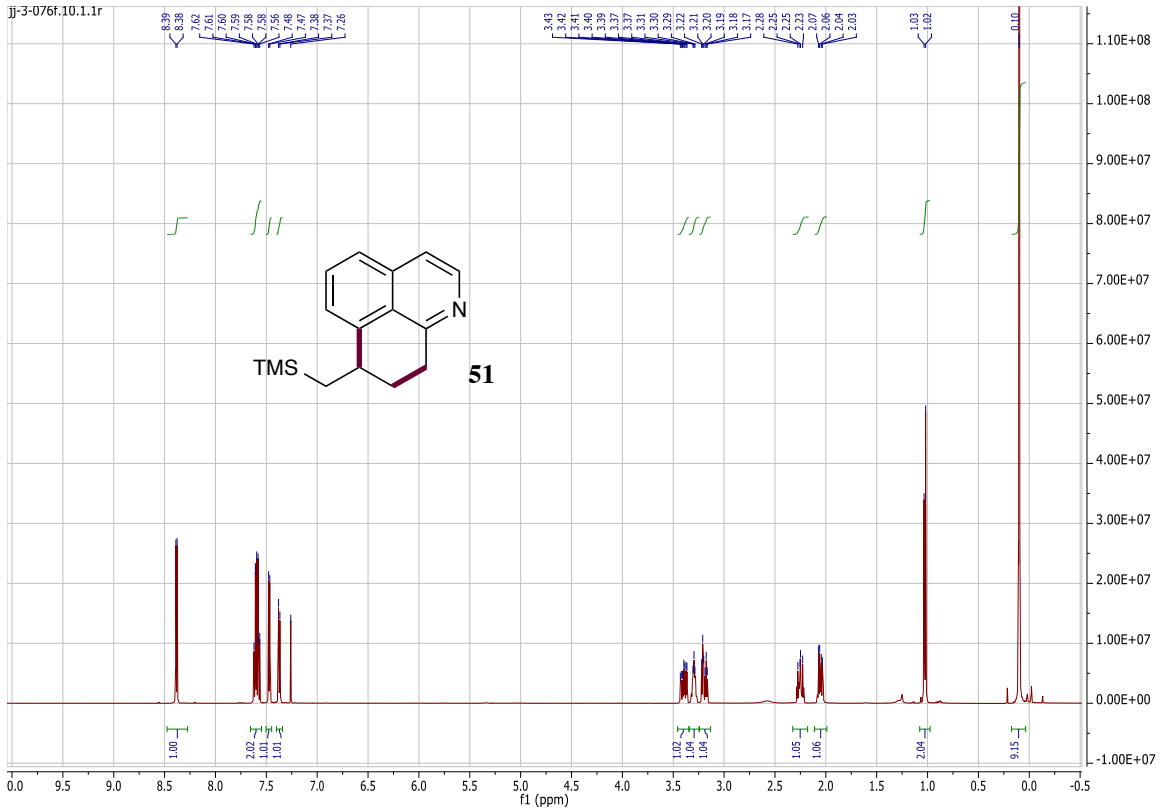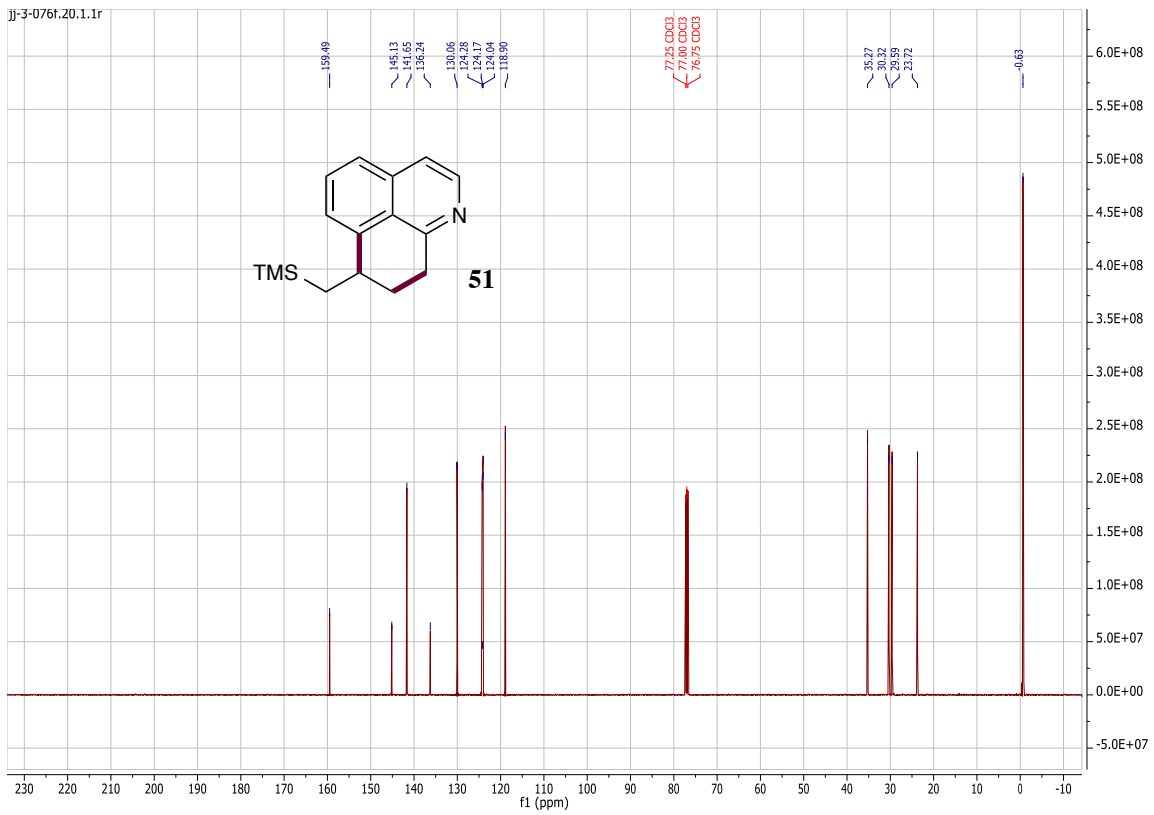

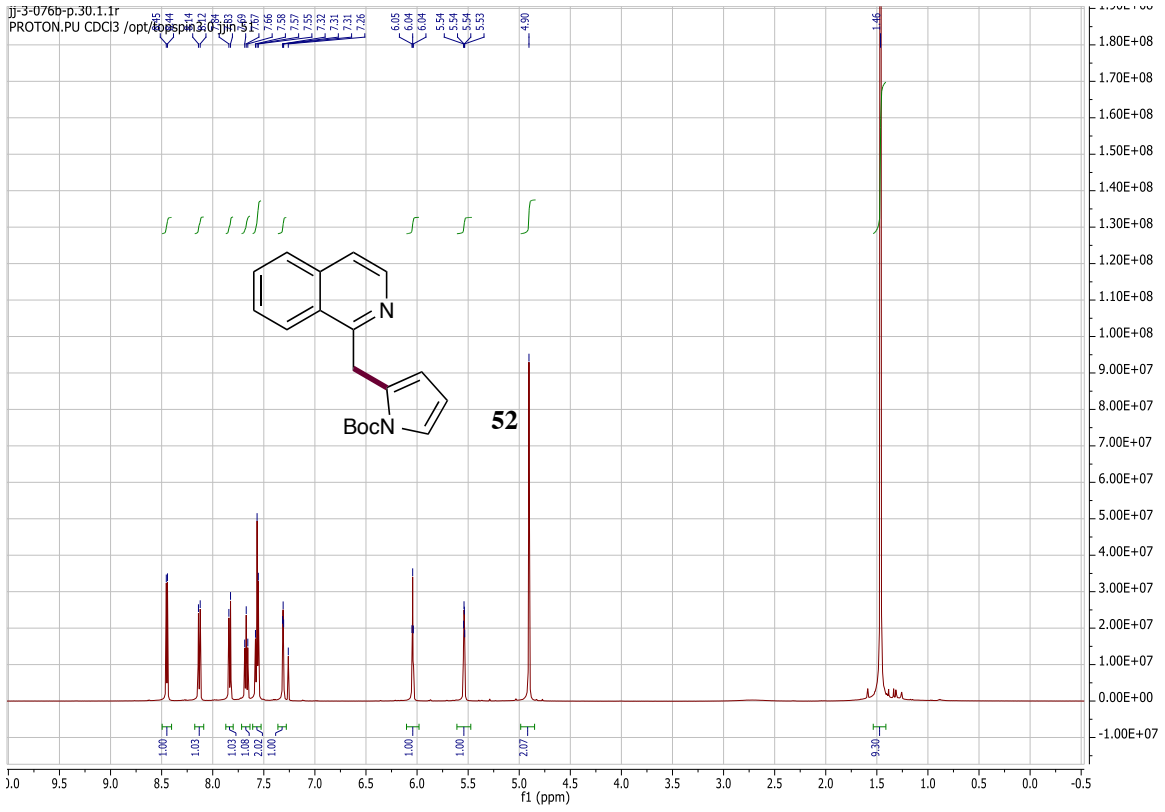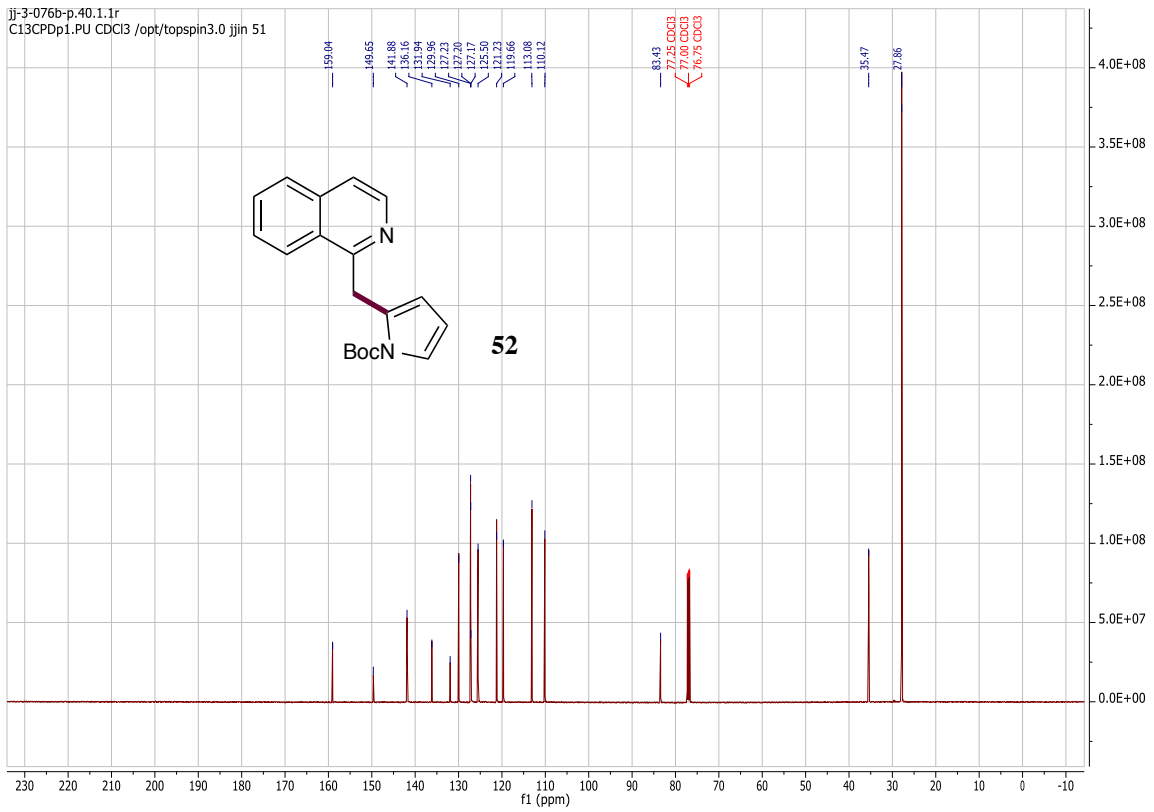

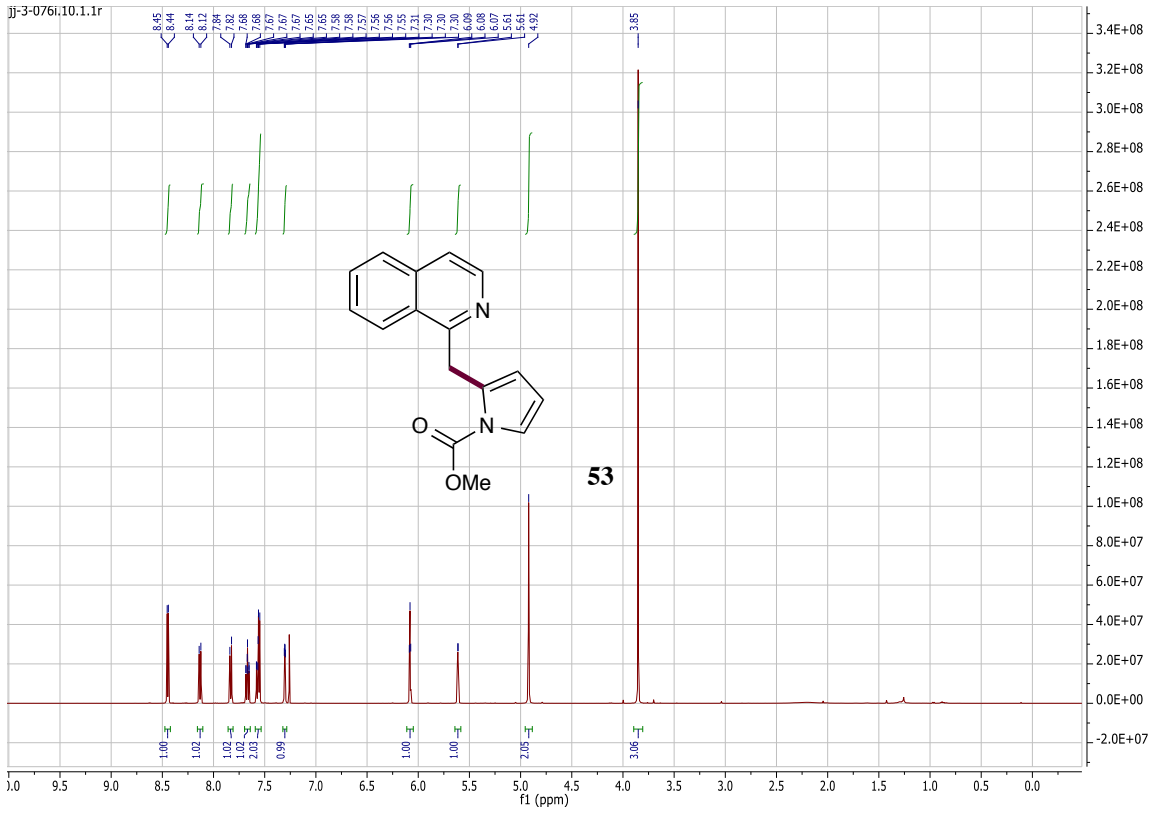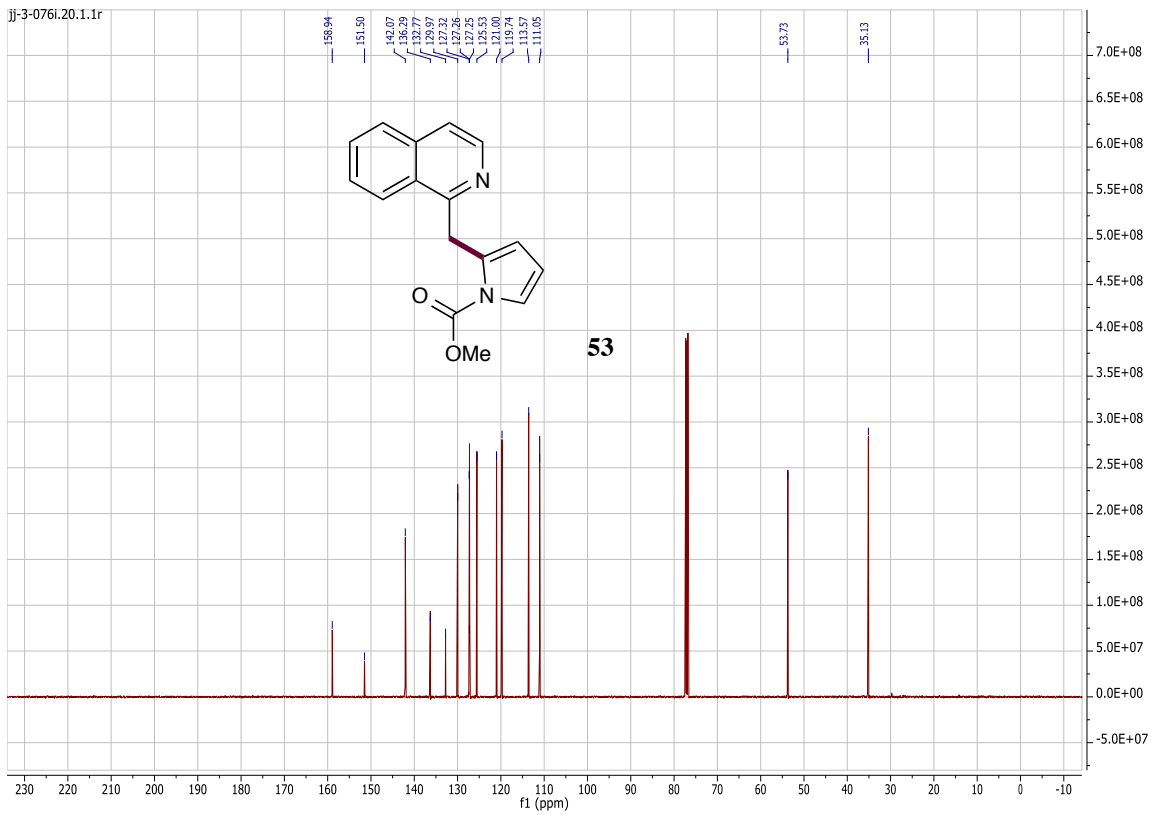

Supplement: NIHMS703713-supplement-1.pdf [file NIHMS703713-supplement-1.pdf]
